# Supplementary material for: Dissolution of Mn-bearing dolomite drives elevated Cr(vi) occurrence in a Permian redbed aquifer
Source: Royal Society of Chemistry journal article supplement (doi:10.1039/d2em00395c), 2022-01-01
Supplement: d2em00395c1.csv [file d2em00395c1.csv]

Site_ID	Depth_ft	Temp_C	pH	H_mmol_L	Cr_mcg_kg	Cr_mmol_kg	CO3_mmol_L	Ca_mmol_kg	Mg_mmol_kg	Na_mmol_kg	K_mmol_kg	Cl_mmol_kg	SO4_mmol_kg	SiO2_mmol_kg	Ca_Activ	Mg_Activ	Ca_Mg_mol_rat	CaCO3_log_QK	Dolo_log_QK	Dol_dis_logQK	Dol_ord_logQK	MgCO3_log_QK	Gypsum_logQK	Dol_dis_SI	CaCO3_SI	MgCO3_SI	Site_ID_1	Y	X
345729096530401	<140		7.1	7.94328E-05	5	9.61611E-05	0.002137	15.72	2.715	7.873		10.44	4.268		0.006596	0.001263	5.2	0.7008	1.589	0.04475	1.589	-0.7404	-0.691	0.04475	0.7008	-0.7404	345729096530401	34.9581357	-96.8847422
345729096530401	<140		7.2	6.30957E-05	5	9.61611E-05	0.002139	38.17	3.497	11.44		19.91	14.47		0.01217	0.001292	9.4	1.01	1.951	0.4067	1.951	-0.6876	-0.0593	0.4067	1.01	-0.6876	345729096530401	34.9581357	-96.8847422
345816097095101	<200	17.2	7	0.0001	0.78	1.50011E-05	0.003103	1.405	1.255	1.144	0.05755	0.5867	0.2332	0.2846	0.0008908	0.0008321	1.1	-0.1383	0.5514	-1.051	0.5514	-0.9881	-2.486	-1.051	-0.1383	-0.9881	345816097095101	34.97102778	-97.1640556
345908096593101	<84	17	6.6	0.000251189	2.5	4.80805E-05	0.000936	0.4491	0.3045	1.609	0.01023	0.4231	0.2707	0.2663	0.00033	0.000229	1.4	-1.473	-2.249	-3.854	-2.249	-2.455	-2.747	-3.854	-1.473	-2.455	345908096593101	34.9856336	-96.9922444
345908096593101	<84	19.5	6.6	0.000251189	5	9.61611E-05	0.001463	0.4741	0.3703	2.088	0.01279	0.141	0.9369		0.0003093	0.0002513	1.2	-1.277	-1.772	-3.358	-1.772	-2.159	-2.261	-3.358	-1.277	-2.159	345908096593101	34.9856336	-96.9922444
345908096593101	<84	18.6	6.4	0.000398107	5	9.61611E-05	0.001494	0.4491	0.3292	1.827	0.01279	0.141	0.2082		0.0003244	0.000244	1.3	-1.455	-2.168	-3.76	-2.168	-2.382	-2.876	-3.76	-1.455	-2.382	345908096593101	34.9856336	-96.9922444
345908096593101	<84	18.5	6.8	0.000158489	5	9.61611E-05	0.001494	0.3493	0.2469	2.392	0.02558	0.141	0.2082		0.0002525	0.0001832	1.4	-1.166	-1.606	-3.199	-1.606	-2.11	-2.978	-3.199	-1.166	-2.11	345908096593101	34.9856336	-96.9922444
345908096593101	<84	19	6.5	0.000316228	5	9.61611E-05	0.001494	0.3743	0.288	2.392	0.02558	0.141	0.5205		0.0002581	0.0002051	1.3	-1.451	-2.133	-3.722	-2.133	-2.348	-2.58	-3.722	-1.451	-2.348	345908096593101	34.9856336	-96.9922444
345908096593101	<84	18.7	6.1	0.000794328	5	9.61611E-05	0.001596	0.4741	0.3703	1.827	0.01279	0.141	0.2082		0.0003398	0.0002727	1.2	-1.705	-2.639	-4.231	-2.639	-2.602	-2.861	-4.231	-1.705	-2.602	345908096593101	34.9856336	-96.9922444
350001097130101	<120	17.5	6.2	0.000630957	2.5	4.80805E-05	0.001546	0.9481	0.6994	1	0.01279	0.5923	0.229	0.3994	0.0006592	0.000501	1.3	-1.354	-1.967	-3.568	-1.967	-2.289	-2.572	-3.568	-1.354	-2.289	350001097130101	35.00035204	-97.2172478
350003097003301	<150	18.5	8.3	5.01187E-06	2.5	4.80805E-05	0.004371	0.1347	0.1234	8.7	0.03325	0.5641	0.1457	0.1664	0.00007922	0.00007832	1	0.2716	1.404	-0.1891	1.404	-0.5372	-3.681	-0.1891	0.2716	-0.5372	350003097003301	35.00091077	-97.009467
350003097090101	<97	16.5	6.1	0.000794328	2.5	4.80805E-05	0.0007328	0.4491	0.3662	0.4785	0.007673	0.3667	0.1457	0.4993	0.0003451	0.0002864	1.2	-2.063	-3.354	-4.962	-3.354	-2.973	-2.986	-4.962	-2.063	-2.973	350003097090101	35.0009086	-97.1505802
350003097090102	<125	16.8	6.9	0.000125893	5	9.61611E-05	0.0008954	0.4491	0.3703	0.435	0.01279	0.141	0.1041		0.0003461	0.0002903	1.2	-1.172	-1.566	-3.171	-1.566	-2.074	-3.131	-3.171	-1.172	-2.074	350003097090102	35.0008333	-97.1502778
350003097090102	<125	16	6.2	0.000630957	5	9.61611E-05	0.0009163	0.4491	0.3703	0.522	0.01279	0.141	0.05205		0.0003484	0.000292	1.2	-1.869	-2.965	-4.577	-2.965	-2.781	-3.428	-4.577	-1.869	-2.781	350003097090102	35.0008333	-97.1502778
350003097090102	<125	17.3	6.1	0.000794328	5	9.61611E-05	0.0009155	0.4741	0.3703	0.4785	0.01279	0.141	0.1041		0.0003641	0.0002894	1.3	-1.932	-3.105	-4.707	-3.105	-2.85	-3.112	-4.707	-1.932	-2.85	350003097090102	35.0008333	-97.1502778
350003097090102	<125	17.4	6.2	0.000630957	5	9.61611E-05	0.0009357	0.4491	0.3703	0.4785	0.01279	0.141	0.05205		0.0003481	0.0002918	1.2	-1.84	-2.898	-4.499	-2.898	-2.734	-3.43	-4.499	-1.84	-2.734	350003097090102	35.0008333	-97.1502778
350003097090102	<125	18.1	6	0.001	5	9.61611E-05	0.0009658	0.4741	0.3703	0.4785	0.01279	0.141	0.1041		0.000363	0.0002887	1.3	-1.998	-3.232	-4.828	-3.232	-2.906	-3.115	-4.828	-1.998	-2.906	350003097090102	35.0008333	-97.1502778
350017096595501	<80	17.8	7.7	1.99526E-05	0.035	6.73127E-07	0.005553	0.272	0.3156	8.526	0.04092	1.213	0.1968	0.1847	0.0001571	0.0001954	0.8	0.06542	1.087	-0.5113	1.087	-0.6524	-3.275	-0.5113	0.06542	-0.6524	350017096595501	35.0046111	-96.9985278
350034097031201	<141	17.7	7.7	1.99526E-05	0.15	2.88483E-06	0.004303	0.3418	0.1284	13.75	0.03453	2.699	2.592	0.1658	0.000164	0.00006727	2.4	-0.03911	0.3954	-1.204	0.3954	-1.24	-2.174	-1.204	-0.03911	-1.24	350034097031201	35.00944444	-97.0533333
350055097125402	<435	18	8.8	1.58489E-06	30	0.000576966	0.002827	0.4491	0.3621	4.785	0.0179	0.9308	0.1666	0.2164	0.0002674	0.0002357	1.1	1.086	2.979	1.382	2.979	0.2207	-3.088	1.382	1.086	0.2207	350055097125402	35.01535176	-97.2153035
350101097125401	<442	19.5	8	0.00001	23	0.000442341	0.002864	0.4491	0.3621	4.785	0.0179	0.4513	0.09578	0.1664	0.0002938	0.0002485	1.2	0.3814	1.562	-0.02376	1.562	-0.4829	-3.288	-0.02376	0.3814	-0.4829	350101097125401	35.01701839	-97.2153035
350117096591001	<260	18	7.2	6.30957E-05	0.91	1.75013E-05	0.003315	1.659	1.605	2.262	0.03785	2.327	0.4664	0.2546	0.0009834	0.001006	1	0.1368	1.146	-0.4505	1.146	-0.6633	-2.174	-0.4505	0.1368	-0.6633	350117096591001	35.0214722	-96.9861111
350202096585901	<300	19.8	8.3	5.01187E-06	5	9.61611E-05	0.003494	0.1996	0.1646	8.265	0.02558	1.128	0.2082		0.0001201	0.0001061	1.1	0.3745	1.569	-0.01439	1.569	-0.467	-3.345	-0.01439	0.3745	-0.467	350202096585901	35.03396588	-96.9833556
350202096585901	<300	18.5	8.3	5.01187E-06	5	9.61611E-05	0.003588	0.1497	0.1234	8.569	0.02558	1.128	0.2082		0.00008999	0.00007951	1.1	0.242	1.296	-0.297	1.296	-0.6156	-3.468	-0.297	0.242	-0.6156	350202096585901	35.03396588	-96.9833556
350202096585901	<300	18.2	8.5	3.16228E-06	5	9.61611E-05	0.003609	0.1996	0.1646	9.047	0.02558	1.128	0.2082		0.0001166	0.0001042	1.1	0.5456	1.906	0.311	1.906	-0.3108	-3.361	0.311	0.5456	-0.3108	350202096585901	35.03396588	-96.9833556
350202096585901	<300	17	8.4	3.98107E-06	5	9.61611E-05	0.003755	0.1497	0.1234	9.221	0.02558	1.128	0.2082		0.00008835	0.00007854	1.1	0.3283	1.462	-0.1424	1.462	-0.5454	-3.478	-0.1424	0.3283	-0.5454	350202096585901	35.03396588	-96.9833556
350202096585901	<300	19.1	8.3	5.01187E-06	5	9.61611E-05	0.004389	0.1996	0.1646	8.613	0.02558	1.128	0.2082		0.0001155	0.0001031	1.1	0.4445	1.709	0.1205	1.709	-0.4013	-3.369	0.1205	0.4445	-0.4013	350202096585901	35.03396588	-96.9833556
350203097072201	<75	17	6.1	0.000794328	2.5	4.80805E-05	0.0009462	0.8234	0.8229	1.305	0.03069	2.257	0.177	0.2496	0.0005744	0.0005916	1	-1.734	-2.6	-4.204	-2.6	-2.544	-2.746	-4.204	-1.734	-2.544	350203097072201	35.0342416	-97.12308
350234097040401	<80	16.9	7.2	6.30957E-05	2	3.84644E-05	0.003643	1.255	0.971	3.036	0.03913	0.9195	0.4352	0.2663	0.0007627	0.0006222	1.2	0.05723	0.8818	-0.7234	0.8818	-0.8552	-2.276	-0.7234	0.05723	-0.8552	350234097040401	35.04291667	-97.0677222
350236097191501	<360	18.2	8.4	3.98107E-06	0.035	6.73127E-07	0.003824	0.1337	0.07447	17.79	0.02327	2.115	5.497	0.1425	0.00005296	0.00003311	1.6	0.1069	0.8737	-0.7217	0.8736	-0.9048	-2.367	-0.7217	0.1069	-0.9048	350236097191501	35.0433333	-97.3208333
350240097064101	<160	17.5	7.6	2.51189E-05	2.5	4.80805E-05	0.002095	0.8234	0.576	1.696	0.05371	0.2341	0.07808	0.233	0.0005714	0.0004131	1.4	0.1108	0.9401	-0.6604	0.9401	-0.8465	-3.094	-0.6604	0.1108	-0.8465	350240097064101	35.0445193	-97.111691
350338097180301	<585		8.4	3.98107E-06	33	0.000634663	0.003096	0.1248	0.04114	6.394		0.3667	0.1041		0.00007735	0.00002741	2.8	0.3074	1.069	-0.4749	1.069	-0.8667	-3.819	-0.4749	0.3074	-0.8667	350338097180301	35.0606274	-97.3011389
350338097180301	<585		9.1	7.94328E-07	34	0.000653895	0.002904	0.0499	0.04114	6.22		0.3385	0.1041		0.00002602	0.0000249	1	0.4591	1.804	0.26	1.804	-0.2835	-4.287	0.26	0.4591	-0.2835	350338097180301	35.0606274	-97.3011389
350412097105001	-999		6.9	0.000125893	5	9.61611E-05	0.003673	1.971	1.07	0.522		0.141	0.1041		0.001227	0.0007007	1.8	0.08296	0.8278	-0.7166	0.8278	-0.8839	-2.725	-0.7166	0.08296	-0.8839	350412097105001	35.0700733	-97.1808589
350419097093801	-999		7.4	3.98107E-05	5	9.61611E-05	0.002145	1.223	0.8229	0.783		0.141	0.1041		0.0008274	0.0005774	1.4	0.1849	1.119	-0.4255	1.119	-0.6948	-2.848	-0.4255	0.1849	-0.6948	350419097093801	35.072018	-97.1608586
350603096550801	<40.0	17	6.9	0.000125893	2.5	4.80805E-05	0.005252	4.741	3.374	5.655	0.02046	9.59	1.249	0.2996	0.002259	0.001771	1.3	0.3552	1.461	-0.1433	1.461	-0.5732	-1.521	-0.1433	0.3552	-0.5732	350603096550801	35.10090949	-96.9191881
350603096550801	<40.0	17.7	6.7	0.000199526	5	9.61611E-05	0.004699	2.794	2.098	4.045	0.01279	3.949	0.9369		0.001477	0.001195	1.2	-0.04865	0.6716	-0.9275	0.6716	-0.9544	-1.753	-0.9275	-0.04865	-0.9544	350603096550801	35.10090949	-96.9191881
350603096550801	<40.0	15	6.9	0.000125893	5	9.61611E-05	0.004799	2.819	2.139	4.263	0.01279	3.667	0.8328		0.001499	0.001226	1.2	0.1257	1.008	-0.612	1.008	-0.8099	-1.794	-0.612	0.1257	-0.8099	350603096550801	35.10090949	-96.9191881
350603096550801	<40.0	17.7	6.9	0.000125893	5	9.61611E-05	0.004831	3.019	2.263	4.176	0.01279	3.949	0.9369		0.001582	0.00128	1.2	0.1895	1.148	-0.4514	1.148	-0.7164	-1.733	-0.4514	0.1895	-0.7164	350603096550801	35.10090949	-96.9191881
350603096550801	<40.0	16.3	6.9	0.000125893	5	9.61611E-05	0.004877	2.844	2.222	4.393	0.01279	4.231	0.8328		0.001499	0.001264	1.2	0.1505	1.079	-0.5307	1.079	-0.755	-1.801	-0.5307	0.1505	-0.755	350603096550801	35.10090949	-96.9191881
350603096550801	<40.0	18.7	6.9	0.000125893	5	9.61611E-05	0.00493	2.994	2.263	4.393	0.01279	4.513	0.8328		0.001566	0.001279	1.2	0.208	1.195	-0.3966	1.195	-0.6813	-1.791	-0.3966	0.208	-0.6813	350603096550801	35.10090949	-96.9191881
350603097065901	<176	17.5	6.7	0.000199526	1	1.92322E-05	0.002258	1.01	0.8805	0.6829	0.03657	0.3413	0.05132	0.2896	0.0006945	0.0006254	1.1	-0.6706	-0.5271	-2.128	-0.5271	-1.532	-3.211	-2.128	-0.6706	-1.532	350603097065901	35.10102778	-97.1158611
350610096555001	<103	16.5	7.1	7.94328E-05	2.5	4.80805E-05	0.00342	2.445	1.563	1.261	0.0179	0.4231	0.9578	0.2996	0.00141	0.0009535	1.5	0.1829	1.049	-0.559	1.049	-0.8159	-1.721	-0.559	0.1829	-0.8159	350610096555001	35.1028537	-96.930855
350624097005601	<80	18.1	6.7	0.000199526	1.3	2.50019E-05	0.002501	1.125	0.8846	0.7743	0.01765	0.3046	0.1364	0.3212	0.0007555	0.0006159	1.2	-0.5826	-0.3906	-1.987	-0.3907	-1.48	-2.759	-1.987	-0.5826	-1.48	350624097005601	35.1067222	-97.0155278
350715097054101	<137.5		7.5	3.16228E-05	5	9.61611E-05	0.002975	1.322	1.234	1.131		0.3667	0.1041		0.0008447	0.0008265	1	0.4294	1.755	0.2102	1.755	-0.3036	-2.866	0.2102	0.4294	-0.3036	350715097054101	35.12090669	-97.0950244
350747097113701	<106		6.1	0.000794328	5	9.61611E-05	0.0004656	2.769	2.469	3.001		5.049	0.7808		0.001622	0.00152	1.1	-1.5	-2.123	-3.667	-2.123	-2.252	-1.808	-3.667	-1.5	-2.252	350747097113701	35.1297941	-97.1939152
350756097232001	<440	18	8.7	1.99526E-06	2.5	4.80805E-05	0.003132	0.07735	0.04937	6.96	0.02046	0.2369	0.3227	0.1581	0.0000456	0.00003175	1.4	0.2725	1.25	-0.3465	1.25	-0.6949	-3.551	-0.3465	0.2725	-0.6949	350756097232001	35.13229145	-97.3891973
350806097230201	-999		8.2	6.30957E-06	5	9.61611E-05	0.003127	0.07485	0.08229	6.742		0.141	0.1041		0.00004737	0.00005541	0.9	-0.09653	0.7803	-0.7641	0.7803	-0.752	-4.033	-0.7641	-0.09653	-0.752	350806097230201	35.13506924	-97.3841972
350845097214501	<690	17.5	7.6	2.51189E-05	17	0.000326948	0.002929	0.9232	1.152	2.479	0.0665	0.7052	0.1041	0.2829	0.0005958	0.0007772	0.8	0.266	1.507	-0.09375	1.507	-0.435	-2.991	-0.09375	0.266	-0.435	350845097214501	35.14590265	-97.362808
351027097131401	<156	17.5	7.4	3.98107E-05	2.5	4.80805E-05	0.002705	1.522	1.275	0.2871		0.268	0.06767	0.2829	0.000998	0.0008697	1.1	0.2552	1.31	-0.2904	1.31	-0.621	-2.973	-0.2904	0.2552	-0.621	351027097131401	35.17423728	-97.2208606
351040097124001	-999		6.9	0.000125893	5	9.61611E-05	0.00337	1.846	1.029	0.2175		0.141	0.1041		0.00117	0.0006837	1.7	0.02656	0.7252	-0.8192	0.7252	-0.9302	-2.737	-0.8192	0.02656	-0.9302	351040097124001	35.1778484	-97.211416
351103096534601	<70	18.4	6.7	0.000199526	0.16	3.07715E-06	0.005245	2.388	1.93	1.409	0.0179	0.3413	0.432	0.3029	0.00135	0.001162	1.2	-0.02262	0.7547	-0.8391	0.7547	-0.8929	-2.102	-0.8391	-0.02262	-0.8929	351103096534601	35.18405556	-96.8961389
351106097155201	<280	18	8.6	2.51189E-06	47	0.000903914	0.002136	0.8982	0.9052	14.79	0.1202	12.69	0.7496	0.3495	0.0004591	0.000511	0.9	0.9779	2.865	1.268	2.865	0.2143	-2.31	1.268	0.9779	0.2143	351106097155201	35.18506984	-97.2647506
351106097155202	<355	19.5	7.5	3.16228E-05	2.5	4.80805E-05	0.002265	0.7236	0.6583	1.957	0.07929	0.1382	0.1145	0.1831	0.0004956	0.0004668	1.1	0.01183	0.8695	-0.7161	0.8695	-0.8057	-2.993	-0.7161	0.01183	-0.8057	351106097155202	35.18506984	-97.2647506
351106097155202	155		7.5	3.16228E-05	5	9.61611E-05	0.002682	0.4741	0.3703	7.786	0.05115	2.792	0.4581	0.08322	0.0002867	0.0002368	1.2	-0.08435	0.6537	-0.8907	0.6537	-0.8908	-2.658	-0.8907	-0.08435	-0.8908	351106097155202	35.18506984	-97.2647506
351106097155202	225		7.6	2.51189E-05	5	9.61611E-05	0.002479	0.9481	0.7817	6.307		2.821	0.7704	0.06657	0.0005553	0.0004857	1.1	0.2634	1.374	-0.1704	1.374	-0.5182	-2.176	-0.1704	0.2634	-0.5182	351106097155202	35.18506984	-97.2647506
351106097155202	265		7.8	1.58489E-05	5	9.61611E-05	0.002915	0.4491	0.3292	10.4	0.07673	3.385	0.6142	0.1331	0.0002584	0.0002022	1.3	0.2003	1.199	-0.345	1.199	-0.6297	-2.589	-0.345	0.2003	-0.6297	351106097155202	35.18506984	-97.2647506
351106097155202	346		7.7	1.99526E-05	5	9.61611E-05	0.002592	1.198	0.6994	21.75	0.05115	12.41	2.884	0.06657	0.0005373	0.0003471	1.5	0.342	1.399	-0.145	1.399	-0.5713	-1.703	-0.145	0.342	-0.5713	351106097155202	35.18506984	-97.2647506
351118097114901	<100	16.5	6.4	0.000398107	2.5	4.80805E-05	0.0006513	0.3493	0.3168	0.1783	0.02046	0.07898	0.06038	0.3495	0.0002799	0.0002571	1.1	-1.902	-2.988	-4.596	-2.988	-2.768	-3.441	-4.596	-1.902	-2.768	351118097114901	35.1884039	-97.1972491
351123097062901	-999		6.5	0.000316228	5	9.61611E-05	0.0004149	0.6986	0.4937	0.2175		0.141	0.1041		0.0005396	0.0003868	1.4	-1.597	-2.434	-3.978	-2.434	-2.465	-2.97	-3.978	-1.597	-2.465	351123097062901	35.18979384	-97.1083583
351123097062901	-999		7	0.0001	5	9.61611E-05	0.001204	0.6986	0.6583	0.5655		0.677	0.1041		0.0005056	0.0004888	1	-0.6698	-0.449	-1.993	-0.449	-1.408	-3.02	-1.993	-0.6698	-1.408	351123097062901	35.18979384	-97.1083583
351123097175601	<100		6.9	0.000125893	5	9.61611E-05	0.002469	1.497	1.317	0.2175		0.3949	0.1041		0.0009787	0.0008963	1.1	-0.184	0.4991	-1.045	0.4991	-0.9457	-2.808	-1.045	-0.184	-0.9457	351123097175601	35.1897915	-97.2991959
351128096555701	<85		7	0.0001	5	9.61611E-05	0.002935	1.996	1.563	2.001		3.074	0.1041		0.001208	0.0009983	1.2	0.07181	0.9662	-0.5782	0.9662	-0.7344	-2.759	-0.5782	0.07181	-0.7344	351128096555701	35.19118478	-96.9327996
351208097190001	95		7	0.0001	5	9.61611E-05	0.002924	1.198	1.399	1.218	0.07673	0.5359	0.05205	0.08322	0.0007707	0.0009408	0.8	-0.1152	0.7615	-0.7829	0.7615	-0.7521	-3.21	-0.7829	-0.1152	-0.7521	351208097190001	35.202291	-97.3169743
351208097190001	155		6.7	0.000199526	5	9.61611E-05	0.001983	0.8483	0.9463	3.393	0.05115	0.7616	0.2707	0.2996	0.0005555	0.0006442	0.9	-0.7212	-0.4728	-2.017	-0.4728	-1.38	-2.608	-2.017	-0.7212	-1.38	351208097190001	35.202291	-97.3169743
351208097190001	195		7.3	5.01187E-05	5	9.61611E-05	0.00255	0.5988	0.6172	4.48	0.05115	1.297	0.3123	0.09986	0.0003818	0.0004124	0.9	-0.1767	0.5854	-0.959	0.5854	-0.8667	-2.693	-0.959	-0.1767	-0.8667	351208097190001	35.202291	-97.3169743
351208097190001	235		7.2	6.30957E-05	5	9.61611E-05	0.0025	0.8234	0.8229	5.307	0.05115	2.031	0.635	0.1997	0.0004973	0.0005242	0.9	-0.1757	0.5768	-0.9676	0.5768	-0.8763	-2.297	-0.9676	-0.1757	-0.8763	351208097190001	35.202291	-97.3169743
351208097190001	255		8	0.00001	5	9.61611E-05	0.002479	0.5739	0.5349	6.786	0.05115	2.51	0.76	0.09986	0.0003364	0.0003339	1	0.4455	1.793	0.2486	1.793	-0.2812	-2.375	0.2486	0.4455	-0.2812	351208097190001	35.202291	-97.3169743
351208097190001	295		7.6	2.51189E-05	5	9.61611E-05	0.002186	0.7984	0.7406	5.133	0.05115	2.031	0.3852	0.08322	0.0004994	0.0004866	1	0.1676	1.229	-0.3152	1.229	-0.5672	-2.504	-0.3152	0.1676	-0.5672	351208097190001	35.202291	-97.3169743
351208097190001	315		7.7	1.99526E-05	5	9.61611E-05	0.00251	0.5739	0.5349	9.613	0.05115	5.641	0.8328	0.08322	0.0003226	0.0003219	1	0.1298	1.164	-0.3805	1.164	-0.5946	-2.376	-0.3805	0.1298	-0.5946	351208097190001	35.202291	-97.3169743
351214097192701	115		7.6	2.51189E-05	5	9.61611E-05	0.002196	0.7984	0.7817	3.654	0.05115	1.495	0.2499	0.1331	0.0005146	0.0005271	1	0.1853	1.286	-0.2581	1.286	-0.5278	-2.671	-0.2581	0.1853	-0.5278	351214097192701	35.20395755	-97.3244745
351214097192701	135		7.2	6.30957E-05	5	9.61611E-05	0.001783	14.35	0.9875	5.046	0.07673	2.228	15.51	0.08322	0.00465	0.0003605	12.9	0.5857	0.966	-0.5784	0.966	-1.248	-0.2093	-0.5784	0.5857	-1.248	351214097192701	35.20395755	-97.3244745
351219097262301	<660	19	8.6	2.51189E-06	14	0.000269251	0.00311	0.1472	0.09463	13.05	0.03581	1.326	3.227	0.1648	0.00006687	0.00004775	1.4	0.3339	1.39	-0.1991	1.39	-0.6101	-2.458	-0.1991	0.3339	-0.6101	351219097262301	35.20534487	-97.4400329
351236097262801	<654	19	8.8	1.58489E-06	100	0.001923221	0.003455	0.09731	0.06172	10.87	0.03581	0.677	1.978	0.1614	0.00004643	0.00003306	1.4	0.4172	1.556	-0.03366	1.556	-0.528	-2.805	-0.03366	0.4172	-0.528	351236097262801	35.21006698	-97.4414219
351239097221101	155		7.7	1.99526E-05	5	9.61611E-05	0.002995	1.572	1.605	1.74	0.05115	0.4231	0.1457	0.1331	0.0009735	0.001046	0.9	0.6866	2.31	0.7653	2.31	-0.005629	-2.685	0.7653	0.6866	-0.005629	351239097221101	35.21090125	-97.3700313
351239097221101	195		7.8	1.58489E-05	5	9.61611E-05	0.002854	1.597	1.646	1.522		0.4231	0.1249	0.1331	0.0009935	0.001077	0.9	0.7732	2.487	0.9424	2.487	0.08488	-2.744	0.9424	0.7732	0.08488	351239097221101	35.21090125	-97.3700313
351239097221101	275		7.9	1.25893E-05	5	9.61611E-05	0.002692	0.9731	0.9875	2.523	0.05115	0.2539	0.1353	0.1165	0.0006251	0.0006662	0.9	0.6543	2.242	0.6971	2.242	-0.04158	-2.862	0.6971	0.6543	-0.04158	351239097221101	35.21090125	-97.3700313
351239097221101	335		7.9	1.25893E-05	5	9.61611E-05	0.002692	1.347	1.317	2.088		0.3385	0.1353	0.1331	0.0008504	0.000874	1	0.7826	2.482	0.9381	2.482	0.07105	-2.756	0.9381	0.7826	0.07105	351239097221101	35.21090125	-97.3700313
351239097221101	355		8	0.00001	5	9.61611E-05	0.002752	1.397	1.358	1.783		0.3385	0.05205	0.1331	0.0008828	0.0009036	1	0.9065	2.728	1.184	2.728	0.1931	-3.157	1.184	0.9065	0.1931	351239097221101	35.21090125	-97.3700313
351239097221101	455		7.7	1.99526E-05	5	9.61611E-05	0.003076	0.998	0.9875	3.306	0.05115	0.4513	0.1249	0.1165	0.00063	0.0006558	1	0.5159	1.954	0.4101	1.954	-0.1902	-2.901	0.4101	0.5159	-0.1902	351239097221101	35.21090125	-97.3700313
351239097221101	495		7.7	1.99526E-05	5	9.61611E-05	0.003158	0.9232	0.864	8.221		3.667	0.5518	0.09986	0.0005273	0.0005274	1	0.4414	1.788	0.2438	1.788	-0.282	-2.356	0.2438	0.4414	-0.282	351239097221101	35.21090125	-97.3700313
351239097221101	515		8	0.00001	5	9.61611E-05	0.003158	0.8982	0.864	11.79		6.318	0.8745	0.09986	0.0004769	0.0004975	1	0.6877	2.299	0.7547	2.299	-0.0174	-2.219	0.7547	0.6877	-0.0174	351239097221101	35.21090125	-97.3700313
351251097000801	<220	18.7	7	0.0001	1.3	2.50019E-05	0.003374	1.524	1.358	0.5959	0.02762	0.409	0.1437	0.2513	0.0009643	0.0008992	1.1	-0.0464	0.7438	-0.8478	0.7437	-0.8782	-2.67	-0.8478	-0.0464	-0.8782	351251097000801	35.21425	-97.0024444
351314097254701	<648	18.5	8.8	1.58489E-06	2.7	5.1927E-05	0.004249	0.04242	0.03003	10.44	0.0179	0.3385	0.8641	0.1448	0.00002133	0.00001706	1.3	0.1665	1.102	-0.4915	1.102	-0.7345	-3.487	-0.4915	0.1665	-0.7345	351314097254701	35.22062248	-97.4300329
351349097175501	75		8.1	7.94328E-06	5	9.61611E-05	0.001073	0.5739	0.4937	0.7395		0.6487	0.05205	0.1165	0.0004218	0.0003731	1.1	0.296	1.444	-0.1004	1.444	-0.4808	-3.381	-0.1004	0.296	-0.4808	351349097175501	35.23034625	-97.2989186
351349097175501	95		8.2	6.30957E-06	5	9.61611E-05	0.001174	0.6986	0.5349	0.783		0.6487	0.1145	0.1165	0.0004997	0.0003953	1.3	0.5037	1.811	0.2666	1.811	-0.3215	-2.977	0.2666	0.5037	-0.3215	351349097175501	35.23034625	-97.2989186
351349097175501	120		8.3	5.01187E-06	5	9.61611E-05	0.001133	0.6238	0.5349	0.7395		0.677	0.05205	0.1165	0.0004511	0.0003997	1.1	0.5428	1.938	0.394	1.938	-0.2332	-3.358	0.394	0.5428	-0.2332	351349097175501	35.23034625	-97.2989186
351349097175501	135		8.3	5.01187E-06	5	9.61611E-05	0.001093	0.6487	0.576	0.696		0.6487	0.05205	0.1165	0.0004693	0.0004302	1.1	0.5436	1.955	0.4104	1.955	-0.2176	-3.344	0.4104	0.5436	-0.2176	351349097175501	35.23034625	-97.2989186
351349097175501	175		8.2	6.30957E-06	5	9.61611E-05	0.001214	0.6986	0.576	0.696		0.6487	0.05205	0.09986	0.0005023	0.0004278	1.2	0.5206	1.877	0.3324	1.877	-0.2726	-3.319	0.3324	0.5206	-0.2726	351349097175501	35.23034625	-97.2989186
351349097175501	205		8.3	5.01187E-06	5	9.61611E-05	0.001245	0.6986	0.6172	0.783		0.677	0.1145	0.1165	0.0004933	0.0004519	1.1	0.6197	2.107	0.5622	2.107	-0.1419	-2.988	0.5622	0.6197	-0.1419	351349097175501	35.23034625	-97.2989186
351349097175501	225		8.2	6.30957E-06	5	9.61611E-05	0.001255	0.6737	0.576	0.696		0.6487	0.05205	0.09986	0.0004838	0.0004275	1.1	0.5188	1.889	0.3447	1.889	-0.2585	-3.334	0.3447	0.5188	-0.2585	351349097175501	35.23034625	-97.2989186
351349097175501	251		8.3	5.01187E-06	5	9.61611E-05	0.001174	0.5739	0.5349	0.6525		0.6205	0.1249	0.08322	0.0004114	0.0003969	1	0.5187	1.927	0.3827	1.927	-0.2204	-3.015	0.3827	0.5187	-0.2204	351349097175501	35.23034625	-97.2989186
351349097175501	274		8.3	5.01187E-06	5	9.61611E-05	0.001326	0.6238	0.576	0.87		0.5923	0.05205	0.09986	0.0004444	0.0004255	1	0.6033	2.093	0.5486	2.093	-0.1391	-3.369	0.5486	0.6033	-0.1391	351349097175501	35.23034625	-97.2989186
351349097175501	283		8	0.00001	5	9.61611E-05	0.001396	0.6986	0.576	0.87		0.5923	0.05205	0.08322	0.0004997	0.0004253	1.2	0.3823	1.6	0.05553	1.6	-0.4112	-3.324	0.05553	0.3823	-0.4112	351349097175501	35.23034625	-97.2989186
351349097175501	340		8	0.00001	5	9.61611E-05	0.001396	0.6737	0.5349	1.087		0.5641	0.05205	0.08322	0.0004823	0.0003953	1.2	0.3673	1.553	0.009005	1.553	-0.4427	-3.336	0.009005	0.3673	-0.4427	351349097175501	35.23034625	-97.2989186
351349097175501	360		7.8	1.58489E-05	5	9.61611E-05	0.001275	0.4741	0.5349	1.261	0.07673	0.5923	0.1145	0.09986	0.0003421	0.0003973	0.9	-0.01691	0.9365	-0.6079	0.9365	-0.6754	-3.132	-0.6079	-0.01691	-0.6754	351349097175501	35.23034625	-97.2989186
351349097175501	415		7.8	1.58489E-05	5	9.61611E-05	0.001255	0.4741	0.5349	1.305		0.5641	0.1145	0.08322	0.0003428	0.000398	0.9	-0.02287	0.9244	-0.62	0.9244	-0.6816	-3.131	-0.62	-0.02287	-0.6816	351349097175501	35.23034625	-97.2989186
351349097175501	463		7.9	1.25893E-05	5	9.61611E-05	0.001457	0.5489	0.5349	1.783		0.8744	0.05205	0.08322	0.0003897	0.0003922	1	0.1941	1.296	-0.248	1.296	-0.5265	-3.428	-0.248	0.1941	-0.5265	351349097175501	35.23034625	-97.2989186
351349097175501	475		8.1	7.94328E-06	5	9.61611E-05	0.001437	0.5489	0.4937	1.914		0.9872	0.1457	0.08322	0.0003824	0.0003569	1.1	0.3764	1.628	0.08378	1.628	-0.377	-2.989	0.08378	0.3764	-0.377	351349097175501	35.23034625	-97.2989186
351349097175501	515		8.3	5.01187E-06	5	9.61611E-05	0.001376	0.499	0.5349	5.742		5.641	0.6038	0.06657	0.0003005	0.0003423	0.9	0.4357	1.833	0.289	1.833	-0.2311	-2.519	0.289	0.4357	-0.2311	351349097175501	35.23034625	-97.2989186
351357097242001	435		8.3	5.01187E-06	20	0.000384644	0.003501	0.1764	0.1819	6.525	0.02507	0.3385	0.2072		0.0001065	0.0001182	0.9	0.3988	1.748	0.2038	1.748	-0.2794	-3.397	0.2038	0.3988	-0.2794	351357097242001	35.23260556	-97.4056583
351357097242001	480		8.4	3.98107E-06	20	0.000384644	0.003673	0.1712	0.167	6.916	0.02251	0.3667	0.2176		0.0001007	0.0001066	0.9	0.4915	1.913	0.369	1.913	-0.2069	-3.403	0.369	0.4915	-0.2069	351357097242001	35.23260556	-97.4056583
351357097242001	540		8.4	3.98107E-06	20	0.000384644	0.003562	0.1724	0.1716	6.699	0.02481	0.3385	0.2103		0.0001022	0.0001103	0.9	0.4854	1.909	0.3647	1.909	-0.2051	-3.409	0.3647	0.4854	-0.2051	351357097242001	35.23260556	-97.4056583
351357097242001	580		8.4	3.98107E-06	20	0.000384644	0.003491	0.1809	0.1749	6.481	0.02481	0.3103	0.203		0.0001079	0.000113	1	0.5007	1.927	0.3821	1.927	-0.203	-3.399	0.3821	0.5007	-0.203	351357097242001	35.23260556	-97.4056583
351357097242001	620		8.8	1.58489E-06	20	0.000384644	0.003866	0.1183	0.1012	7.96	0.01969	0.7616	0.2634		0.00006187	0.00006012	1	0.6806	2.254	0.7097	2.254	-0.05534	-3.536	0.7097	0.6806	-0.05534	351357097242001	35.23260556	-97.4056583
351357097242001	-999	17.6	8.3	5.01187E-06	20	0.000384644	0.003488	0.1664	0.1695	6.525	0.02481	0.4231	0.2124		0.0001028	0.0001117	0.9	0.2781	1.453	-0.1472	1.453	-0.5007	-3.389	-0.1472	0.2781	-0.5007	351357097242001	35.23260556	-97.4056583
351357097242001	605		8.7	1.99526E-06	30	0.000576966	0.003846	0.1168	0.09463	9.178	0.01918	1.692	0.3685		0.00006151	0.00005598	1.1	0.5795	2.023	0.4789	2.023	-0.185	-3.403	0.4789	0.5795	-0.185	351357097242001	35.23260556	-97.4056583
351401097252301	<589	18.6	8.9	1.25893E-06	10	0.000192322	0.003405	0.03268	0.02222	9.743	0.01432	0.3667	0.7881		0.00001695	0.00001298	1.3	0.06807	0.8864	-0.7059	0.8864	-0.8506	-3.616	-0.7059	0.06807	-0.8506	351401097252301	35.23367786	-97.4233663
351401097252301	<589	19.5	8.9	1.25893E-06	10	0.000192322	0.003423	0.03219	0.02222	9.7	0.01407	0.3667	0.7974		0.00001658	0.00001292	1.3	0.07348	0.9102	-0.6754	0.9102	-0.8266	-3.621	-0.6754	0.07348	-0.8266	351401097252301	35.23367786	-97.4233663
351401097252301	<589	20	8.9	1.25893E-06	10	0.000192322	0.003483	0.03343	0.02304	9.743	0.01407	0.3667	0.7964		0.00001711	0.00001333	1.3	0.1012	0.969	-0.6129	0.969	-0.7925	-3.61	-0.6129	0.1012	-0.7925	351401097252301	35.23367786	-97.4233663
351401097252301	<589	19.5	8.9	1.25893E-06	10	0.000192322	0.003525	0.03443	0.02386	9.787	0.01407	0.3667	0.7922		0.00001762	0.00001381	1.3	0.1122	0.9902	-0.5954	0.9902	-0.7853	-3.599	-0.5954	0.1122	-0.7853	351401097252301	35.23367786	-97.4233663
351401097252301	<589	20.1	8.8	1.58489E-06	10	0.000192322	0.003544	0.03568	0.02427	10.09	0.01432	0.3949	0.8599		0.00001854	0.00001411	1.3	0.05139	0.8598	-0.7213	0.8598	-0.8512	-3.544	-0.7213	0.05139	-0.8512	351401097252301	35.23367786	-97.4233663
351401097252301	<589	19.5	9	0.000001	10	0.000192322	0.003809	0.03219	0.02469	9.134	0.03709	0.3667	0.7142		0.0000158	0.00001398	1.1	0.19	1.199	-0.3867	1.199	-0.6545	-3.69	-0.3867	0.19	-0.6545	351401097252301	35.23367786	-97.4233663
351401097252301	<589	19.8	9	0.000001	10	0.000192322	0.004154	0.03343	0.02304	9.613	0.01304	0.3667	0.7829		0.00001587	0.00001273	1.2	0.2319	1.242	-0.3417	1.242	-0.6517	-3.654	-0.3417	0.2319	-0.6517	351401097252301	35.23367786	-97.4233663
351401097252301	420		9	0.000001	20	0.000384644	0.003623	0.03219	0.02427	8.656	0.03709	0.2821	0.5393		0.00001555	0.00001366	1.1	0.2354	1.32	-0.2246	1.32	-0.5444	-3.822	-0.2246	0.2354	-0.5444	351401097252301	35.23367786	-97.4233663
351401097252301	445		9	0.000001	20	0.000384644	0.00341	0.03219	0.02757	8.134	0.03453	0.2708	0.5028		0.00001592	0.0000158	1	0.2209	1.344	-0.2007	1.344	-0.506	-3.838	-0.2007	0.2209	-0.506	351401097252301	35.23367786	-97.4233663
351401097252301	485		9	0.000001	20	0.000384644	0.003572	0.03144	0.02674	7.786	0.03478	0.3103	0.6028		0.00001523	0.00001508	1	0.2214	1.344	-0.2006	1.344	-0.5064	-3.779	-0.2006	0.2214	-0.5064	351401097252301	35.23367786	-97.4233663
351401097252301	510		9	0.000001	20	0.000384644	0.003592	0.03194	0.02592	8.787	0.03223	0.3103	0.6121		0.00001536	0.00001452	1.1	0.2259	1.332	-0.212	1.332	-0.5223	-3.774	-0.212	0.2259	-0.5223	351401097252301	35.23367786	-97.4233663
351401097252301	550		9	0.000001	20	0.000384644	0.002844	0.03194	0.02469	9.047	0.03836	0.3385	0.6392		0.00001629	0.00001436	1.1	0.1512	1.153	-0.3914	1.153	-0.627	-3.726	-0.3914	0.1512	-0.627	351401097252301	35.23367786	-97.4233663
351401097252301	560		8.9	1.25893E-06	20	0.000384644	0.003016	0.03194	0.02469	9.265	0.03274	0.3385	0.6496		0.00001657	0.00001447	1.1	0.09326	1.033	-0.5113	1.033	-0.6889	-3.714	-0.5113	0.09326	-0.6889	351401097252301	35.23367786	-97.4233663
351401097252301	<589	18.7	9	0.000001	20	0.000384644	0.003181	0.03069	0.02757	7.83	0.01253	0.2341	0.3904		0.00001645	0.00001675	1	0.1239	1.123	-0.4689	1.123	-0.6697	-3.916	-0.4689	0.1239	-0.6697	351401097252301	35.23367786	-97.4233663
351409097231801	430		6.7	0.000199526	60	0.001153933	0.002145	0.225	0.2971	3.541	0.03453	0.0959	0.1104		0.0001574	0.0002148	0.7	-1.225	-1.409	-2.953	-1.409	-1.813	-3.477	-2.953	-1.225	-1.813	351409097231801	35.2359005	-97.3886432
351409097231801	435		8.1	7.94328E-06	60	0.001153933	0.002267	0.2378	0.311	3.545	0.05064	0.0818	0.1083		0.0001613	0.0002209	0.7	0.2015	1.445	-0.09968	1.445	-0.3856	-3.477	-0.09968	0.2015	-0.3856	351409097231801	35.2359005	-97.3886432
351409097231801	660		8.9	1.25893E-06	60	0.001153933	0.002955	0.1365	0.167	5.655	0.02558	0.3949	0.1541		0.00007609	0.0001048	0.7	0.7516	2.548	1.003	2.548	0.1671	-3.659	1.003	0.7516	0.1671	351409097231801	35.2359005	-97.3886432
351409097231801	470		8.3	5.01187E-06	70	0.001346255	0.002317	0.1754	0.2168	3.78	0.02992	0.05923	0.1041		0.0001175	0.0001531	0.8	0.2705	1.561	0.01702	1.561	-0.3379	-3.624	0.01702	0.2705	-0.3379	351409097231801	35.2359005	-97.3886432
351409097231801	470		6.9	0.000125893	70	0.001346255	0.002165	0.1764	0.2222	3.771	0.03223	0.0677	0.1062		0.0001237	0.0001611	0.8	-1.125	-1.23	-2.775	-1.23	-1.734	-3.592	-2.775	-1.125	-1.734	351409097231801	35.2359005	-97.3886432
351409097231801	470		8	0.00001	70	0.001346255	0.002155	0.1659	0.2098	3.867	0.0289	0.0677	0.1051		0.0001143	0.0001507	0.8	-0.06704	0.8913	-0.6531	0.8913	-0.6705	-3.63	-0.6531	-0.06704	-0.6705	351409097231801	35.2359005	-97.3886432
351409097231801	470		7.9	1.25893E-05	70	0.001346255	0.002145	0.1677	0.2115	3.871	0.02813	0.05923	0.1041		0.0001161	0.0001523	0.8	-0.1613	0.7008	-0.8436	0.7008	-0.7667	-3.628	-0.8436	-0.1613	-0.7667	351409097231801	35.2359005	-97.3886432
351409097231801	470		8.2	6.30957E-06	70	0.001346255	0.002135	0.1702	0.2156	3.776	0.03018	0.07334	0.1187		0.0001159	0.0001539	0.8	0.1319	1.292	-0.2523	1.292	-0.4686	-3.571	-0.2523	0.1319	-0.4686	351409097231801	35.2359005	-97.3886432
351409097231801	500		8.4	3.98107E-06	70	0.001346255	0.002297	0.1766	0.2164	3.823	0.02992	0.06205	0.1051		0.0001172	0.0001521	0.8	0.3628	1.744	0.1996	1.744	-0.2476	-3.621	0.1996	0.3628	-0.2476	351409097231801	35.2359005	-97.3886432
351409097231801	500		8.2	6.30957E-06	70	0.001346255	0.002216	0.1781	0.2197	3.915	0.03069	0.09872	0.1114		0.0001206	0.0001561	0.8	0.1645	1.346	-0.1981	1.346	-0.447	-3.584	-0.1981	0.1645	-0.447	351409097231801	35.2359005	-97.3886432
351409097231801	500		8.2	6.30957E-06	70	0.001346255	0.002176	0.1849	0.2329	3.806	0.02967	0.08462	0.1083		0.0001256	0.0001659	0.8	0.1744	1.375	-0.1696	1.375	-0.4284	-3.579	-0.1696	0.1744	-0.4284	351409097231801	35.2359005	-97.3886432
351409097231801	550		8.3	5.01187E-06	70	0.001346255	0.002297	0.1959	0.2407	4.106	0.0312	0.08744	0.1093		0.0001306	0.0001692	0.8	0.3114	1.641	0.09613	1.641	-0.2997	-3.562	0.09613	0.3114	-0.2997	351409097231801	35.2359005	-97.3886432
351409097231801	550		8.2	6.30957E-06	70	0.001346255	0.002277	0.1809	0.2255	3.976	0.03044	0.1044	0.1135		0.0001219	0.0001596	0.8	0.1805	1.383	-0.1611	1.383	-0.426	-3.573	-0.1611	0.1805	-0.426	351409097231801	35.2359005	-97.3886432
351409097231801	550		8.3	5.01187E-06	70	0.001346255	0.002135	0.1806	0.2288	3.867	0.03069	0.09026	0.1114		0.0001219	0.0001625	0.8	0.2512	1.532	-0.01218	1.532	-0.3477	-3.579	-0.01218	0.2512	-0.3477	351409097231801	35.2359005	-97.3886432
351409097231801	600		8.3	5.01187E-06	70	0.001346255	0.002216	0.1627	0.1995	4.058	0.02916	0.11	0.1166		0.0001092	0.000141	0.8	0.2192	1.455	-0.08958	1.455	-0.3932	-3.606	-0.08958	0.2192	-0.3932	351409097231801	35.2359005	-97.3886432
351409097231801	605		8.3	5.01187E-06	70	0.001346255	0.002418	0.1889	0.2316	3.867	0.03018	0.09026	0.1083		0.0001254	0.0001624	0.8	0.3165	1.651	0.1063	1.651	-0.2946	-3.582	0.1063	0.3165	-0.2946	351409097231801	35.2359005	-97.3886432
351409097231801	630		8.8	1.58489E-06	70	0.001346255	0.002833	0.108	0.1168	6.351	0.01969	0.6487	0.2082		0.00006189	0.00007423	0.8	0.5516	2.087	0.543	2.087	-0.093	-3.619	0.543	0.5516	-0.093	351409097231801	35.2359005	-97.3886432
351409097231801	635		8.3	5.01187E-06	70	0.001346255	0.002358	0.1881	0.23	3.789	0.02967	0.08462	0.1083		0.0001254	0.0001619	0.8	0.306	1.628	0.08361	1.628	-0.3068	-3.581	0.08361	0.306	-0.3068	351409097231801	35.2359005	-97.3886432
351409097231801	660		8.9	1.25893E-06	70	0.001346255	0.003056	0.113	0.1378	7.003	0.02302	0.9026	0.2363		0.00006113	0.00008424	0.7	0.6681	2.381	0.8364	2.381	0.08388	-3.578	0.8364	0.6681	0.08388	351409097231801	35.2359005	-97.3886432
351409097231801	<695	17.5	8.6	2.51189E-06	70	0.001346255	0.002441	0.1692	0.2061	4.698	0.02916	0.3667	0.1582		0.0001091	0.0001418	0.8	0.4441	1.861	0.2609	1.861	-0.2585	-3.472	0.2609	0.4441	-0.2585	351409097231801	35.2359005	-97.3886432
351409097231801	<695	17.6	8.4	3.98107E-06	70	0.001346255	0.002451	0.1806	0.2197	4.232	0.0289	0.1664	0.1249		0.0001202	0.0001542	0.8	0.297	1.562	-0.03757	1.562	-0.41	-3.53	-0.03757	0.297	-0.41	351409097231801	35.2359005	-97.3886432
351409097231801	<695	17.5	8.5	3.16228E-06	70	0.001346255	0.002451	0.1729	0.2185	4.524	0.03018	0.2623	0.1447		0.0001132	0.0001517	0.7	0.3661	1.719	0.1181	1.719	-0.3233	-3.494	0.1181	0.3661	-0.3233	351409097231801	35.2359005	-97.3886432
351409097231801	<695	17.6	8.5	3.16228E-06	70	0.001346255	0.002492	0.1397	0.1679	4.959	0.02737	0.3667	0.1634		0.00009078	0.0001158	0.8	0.2785	1.523	-0.07695	1.523	-0.4308	-3.536	-0.07695	0.2785	-0.4308	351409097231801	35.2359005	-97.3886432
351409097231801	580		8.9	1.25893E-06	80	0.001538577	0.00342	0.104	0.1193	8.265	0.01969	1.297	0.3363		0.0000536	0.00007018	0.8	0.6563	2.335	0.7906	2.335	0.04987	-3.493	0.7906	0.6563	0.04987	351409097231801	35.2359005	-97.3886432
351409097231801	630		8.9	1.25893E-06	80	0.001538577	0.003319	0.1053	0.1197	7.917	0.01969	1.185	0.3165		0.00005495	0.0000711	0.8	0.6551	2.327	0.783	2.327	0.04353	-3.506	0.783	0.6551	0.04353	351409097231801	35.2359005	-97.3886432
351409097231801	630		8.8	1.58489E-06	80	0.001538577	0.003005	0.113	0.1275	6.873	0.022	0.8744	0.2426		0.00006329	0.00007957	0.8	0.5848	2.174	0.6299	2.174	-0.03931	-3.55	0.6299	0.5848	-0.03931	351409097231801	35.2359005	-97.3886432
351409097231801	660		8.8	1.58489E-06	80	0.001538577	0.003441	0.1145	0.1296	8.656	0.01969	1.58	0.3352		0.00006055	0.00007724	0.8	0.619	2.249	0.7047	2.249	0.001259	-3.446	0.7047	0.619	0.001259	351409097231801	35.2359005	-97.3886432
351409097231801	<695	18.5	8.3	5.01187E-06	84	0.001615506	0.002277	0.1871	0.2427	3.958	0.03581	0.08462	0.1041	0.1831	0.0001272	0.0001728	0.7	0.2058	1.41	-0.1826	1.41	-0.465	-3.582	-0.1826	0.2058	-0.465	351409097231801	35.2359005	-97.3886432
351409097231801	500		8.7	1.99526E-06	90	0.001730899	0.003279	0.1292	0.1477	7.873	0.02174	1.269	0.3279		0.00007146	0.00009066	0.8	0.5784	2.166	0.6212	2.166	-0.04169	-3.378	0.6212	0.5784	-0.04169	351409097231801	35.2359005	-97.3886432
351409097231801	580		9.1	7.94328E-07	90	0.001730899	0.003734	0.08633	0.08969	9.482	0.01714	1.777	0.4258		0.00003933	0.00004862	0.8	0.7338	2.465	0.9205	2.465	0.1024	-3.536	0.9205	0.7338	0.1024	351409097231801	35.2359005	-97.3886432
351409097231801	630		9.2	6.30957E-07	100	0.001923221	0.003714	0.09032	0.09504	9.395	0.01688	1.749	0.4175		0.00003927	0.00005009	0.8	0.8152	2.641	1.097	2.641	0.1974	-3.545	1.097	0.8152	0.1974	351409097231801	35.2359005	-97.3886432
351409097231801	660		8.8	1.58489E-06	100	0.001923221	0.003623	0.0998	0.1173	9.221	0.01893	1.749	0.3987		0.00005163	0.00006869	0.8	0.5708	2.171	0.6266	2.171	-0.02863	-3.444	0.6266	0.5708	-0.02863	351409097231801	35.2359005	-97.3886432
351409097231801	660		8.9	1.25893E-06	110	0.002115543	0.003866	0.05863	0.04649	10.66	0.01177	2.454	0.4466		0.00002843	0.00002604	1.1	0.4292	1.726	0.1812	1.726	-0.3324	-3.662	0.1812	0.4292	-0.3324	351409097231801	35.2359005	-97.3886432
351411096590001	<135	18.5	7.5	3.16228E-05	5	9.61611E-05	0.003477	2.345	0.864	7.351	0.08696	0.5359	3.654	0.233	0.001106	0.0004426	2.5	0.5043	1.477	-0.1165	1.477	-0.6974	-1.25	-0.1165	0.5043	-0.6974	351411096590001	35.2364608	-96.9836337
351414097293901	<745	18.5	8.6	2.51189E-06	0.25	4.80805E-06	0.004026	0.09232	0.06172	13.05	0.02302	0.5923	2.811	0.1664	0.00004192	0.00003133	1.3	0.2371	1.213	-0.3796	1.213	-0.6933	-2.716	-0.3796	0.2371	-0.6933	351414097293901	35.23728796	-97.4944793
351414097293901	580		8.4	3.98107E-06	5	9.61611E-05	0.003735	0.09506	0.05637	13.18	0.03044	0.6205	2.894		0.00004335	0.00002855	1.5	0.117	0.9579	-0.5865	0.9579	-0.7879	-2.7	-0.5865	0.117	-0.7879	351414097293901	35.23728796	-97.4944793
351414097293901	598		8.4	3.98107E-06	5	9.61611E-05	0.003765	0.09631	0.05678	13.22	0.03197	0.6205	2.936		0.00004374	0.00002866	1.5	0.1243	0.9702	-0.5742	0.9702	-0.7829	-2.691	-0.5742	0.1243	-0.7829	351414097293901	35.23728796	-97.4944793
351414097293901	610		8.4	3.98107E-06	5	9.61611E-05	0.003826	0.09581	0.05678	13.22	0.03044	0.6487	2.957		0.00004336	0.00002858	1.5	0.1272	0.9787	-0.5657	0.9787	-0.7773	-2.692	-0.5657	0.1272	-0.7773	351414097293901	35.23728796	-97.4944793
351414097293901	625		8.4	3.98107E-06	5	9.61611E-05	0.003755	0.09531	0.05637	13.18	0.02992	0.6487	2.936		0.0000433	0.00002846	1.5	0.1188	0.9605	-0.5839	0.9605	-0.7871	-2.695	-0.5839	0.1188	-0.7871	351414097293901	35.23728796	-97.4944793
351414097293901	655		8.3	5.01187E-06	5	9.61611E-05	0.003796	0.09281	0.05678	13.14	0.02762	0.6205	3.04		0.00004227	0.00002863	1.5	0.01572	0.7676	-0.7768	0.7676	-0.877	-2.691	-0.7768	0.01572	-0.877	351414097293901	35.23728796	-97.4944793
351414097293901	<745	18.1	8.4	3.98107E-06	10	0.000192322	0.003701	0.08308	0.04855	12.09	0.02839	0.5641	2.322		0.00004059	0.00002605	1.6	-0.00877	0.653	-0.943	0.653	-1.01	-2.801	-0.943	-0.00877	-1.01	351414097293901	35.23728796	-97.4944793
351422097072801	<140	16.2	6.8	0.000158489	2	3.84644E-05	0.003196	1.447	1.201	0.4293	0.03683	0.2849	0.05195	0.1981	0.0009402	0.0008132	1.2	-0.3139	0.1605	-1.45	0.1605	-1.21	-3.109	-1.45	-0.3139	-1.21	351422097072801	35.23963889	-97.1244722
351426097232201	560		7.9	1.25893E-05	30	0.000576966	0.003147	0.4167	0.5678	4.698	0.04911	0.3385	0.254		0.0002616	0.0003769	0.7	0.3478	1.76	0.2151	1.76	-0.2171	-2.936	0.2151	0.3478	-0.2171	351426097232201	35.2406226	-97.3897544
351426097232201	615		7.6	2.51189E-05	30	0.000576966	0.003157	0.4167	0.5678	4.741	0.04808	0.3385	0.2686		0.0002636	0.0003781	0.7	0.055	1.172	-0.3724	1.172	-0.5118	-2.909	-0.3724	0.055	-0.5118	351426097232201	35.2406226	-97.3897544
351426097232201	600		7.9	1.25893E-05	40	0.000769288	0.003096	0.4017	0.5472	4.524	0.04757	0.3103	0.254		0.0002534	0.0003647	0.7	0.3277	1.719	0.1744	1.719	-0.2377	-2.947	0.1744	0.3277	-0.2377	351426097232201	35.2406226	-97.3897544
351426097232201	<732	17.5	8.3	5.01187E-06	50	0.000961611	0.002665	0.3343	0.4567	3.854	0.04425	0.2087	0.1801		0.0002181	0.0003142	0.7	0.4889	1.996	0.3952	1.996	-0.169	-3.133	0.3952	0.4889	-0.169	351426097232201	35.2406226	-97.3897544
351426097232201	470		7.9	1.25893E-05	60	0.001153933	0.002388	0.3418	0.4732	3.284	0.04732	0.1692	0.153		0.0002293	0.0003318	0.7	0.1768	1.419	-0.1251	1.419	-0.3863	-3.19	-0.1251	0.1768	-0.3863	351426097232201	35.2406226	-97.3897544
351426097232201	530		8	0.00001	60	0.001153933	0.00254	0.3393	0.469	3.589	0.04501	0.1918	0.1718		0.0002238	0.0003247	0.7	0.2907	1.648	0.1041	1.648	-0.2711	-3.153	0.1041	0.2907	-0.2711	351426097232201	35.2406226	-97.3897544
351426097232201	420		7.5	3.16228E-05	70	0.001346255	0.002206	0.3244	0.4526	2.914	0.04527	0.1297	0.128		0.0002237	0.0003238	0.7	-0.2638	0.5383	-1.006	0.5383	-0.8267	-3.272	-1.006	-0.2638	-0.8267	351426097232201	35.2406226	-97.3897544
351426097232201	470		8.1	7.94328E-06	80	0.001538577	0.002064	0.2695	0.3538	3.267	0.04169	0.1185	0.1333		0.0001842	0.0002525	0.7	0.2185	1.479	-0.06508	1.479	-0.368	-3.33	-0.06508	0.2185	-0.368	351426097232201	35.2406226	-97.3897544
351426097232201	495		7.8	1.58489E-05	80	0.001538577	0.002125	0.272	0.3551	3.271	0.04195	0.1185	0.1343		0.0001874	0.0002543	0.7	-0.05794	0.922	-0.6224	0.922	-0.6488	-3.32	-0.6224	-0.05794	-0.6488	351426097232201	35.2406226	-97.3897544
351426097232201	525		7.8	1.58489E-05	80	0.001538577	0.002125	0.252	0.3242	3.458	0.04016	0.11	0.1364		0.0001736	0.0002322	0.7	-0.09102	0.8495	-0.6949	0.8495	-0.6883	-3.345	-0.6949	-0.09102	-0.6883	351426097232201	35.2406226	-97.3897544
351426097232201	615		8.8	1.58489E-06	80	0.001538577	0.003633	0.1564	0.1905	5.916	0.02813	1.692	0.4081		0.00008213	0.0001133	0.7	0.7772	2.6	1.055	2.6	0.1936	-3.221	1.055	0.7772	0.1936	351426097232201	35.2406226	-97.3897544
351426097232201	<732	17.8	8.5	3.16228E-06	80	0.001538577	0.002603	0.1724	0.2131	5.133	0.02941	0.4231	0.1916		0.0001104	0.0001452	0.8	0.3835	1.747	0.1491	1.747	-0.31	-3.39	0.1491	0.3835	-0.31	351426097232201	35.2406226	-97.3897544
351448097024501	<160	17.5	6.7	0.000199526	0.43	8.26985E-06	0.004058	1.856	1.773	0.7525	0.06266	0.8857	0.1634	0.2896	0.001121	0.001129	1	-0.2223	0.418	-1.183	0.418	-1.036	-2.578	-1.183	-0.2223	-1.036	351448097024501	35.2466111	-97.0458889
351450097114201	<64.6	16.6	6	0.001	5	9.61611E-05	0.0004274	0.2495	0.2469	0.174	0.07673	0.141	0.2082		0.0001991	0.0001998	1	-2.63	-4.404	-6.011	-4.404	-3.456	-3.039	-6.011	-2.63	-3.456	351450097114201	35.2472	-97.1949889
351450097114201	<64.6	16.6	6	0.001	5	9.61611E-05	0.0004681	0.2495	0.2057	0.174	0.05115	0.141	0.1041		0.0002036	0.0001698	1.2	-2.579	-4.383	-5.99	-4.383	-3.486	-3.324	-5.99	-2.579	-3.486	351450097114201	35.2472	-97.1949889
351450097114201	<64.6	16.8	6	0.001	5	9.61611E-05	0.0004681	0.2495	0.2469	0.174	0.05115	0.5641	0.2082		0.0001966	0.0001977	1	-2.594	-4.33	-5.936	-4.33	-3.416	-3.049	-5.936	-2.594	-3.416	351450097114201	35.2472	-97.1949889
351450097114201	<64.6	16.6	6	0.001	5	9.61611E-05	0.0004885	0.2745	0.2469	0.1305	0.05115	0.141	0.1041		0.0002227	0.0002027	1.1	-2.522	-4.232	-5.839	-4.232	-3.391	-3.291	-5.839	-2.522	-3.391	351450097114201	35.2472	-97.1949889
351450097114201	<64.6	16.5	6	0.001	5	9.61611E-05	0.0004885	0.2994	0.2469	0.174	0.05115	0.141	0.1041		0.0002421	0.0002021	1.2	-2.488	-4.201	-5.809	-4.201	-3.395	-3.257	-5.809	-2.488	-3.395	351450097114201	35.2472	-97.1949889
351455096563801	<315	19	7.3	5.01187E-05	2.5	4.80805E-05	0.002104	3.743	1.893	4.002	0.0844	0.677	5.518	0.2996	0.00166	0.0009141	1.8	0.2634	1.137	-0.4527	1.137	-0.7933	-0.9434	-0.4527	0.2634	-0.7933	351455096563801	35.24868318	-96.9441888
351455096563801	<315	18.5	7.3	5.01187E-05	2.5	4.80805E-05	0.002156	3.992	2.139	4.48	0.08696	0.4795	6.267	0.2829	0.00171	0.001001	1.7	0.2768	1.187	-0.4061	1.187	-0.7594	-0.8862	-0.4061	0.2768	-0.7594	351455096563801	35.24868318	-96.9441888
351455097153301	140		7.9	1.25893E-05	5	9.61611E-05	0.001862	0.8982	0.864	0.696	0.07673	0.1974	0.05205	0.09986	0.00062	0.0006185	1	0.4971	1.898	0.354	1.898	-0.2275	-3.257	0.354	0.4971	-0.2275	351455097153301	35.24867974	-97.2594733
351455097153301	175		8	0.00001	5	9.61611E-05	0.0017	0.7236	0.7817	0.8265	0.05115	0.1692	0.05205	0.08322	0.0005071	0.0005674	0.9	0.4717	1.897	0.3531	1.897	-0.203	-3.33	0.3531	0.4717	-0.203	351455097153301	35.24867974	-97.2594733
351455097153301	195		7.5	3.16228E-05	5	9.61611E-05	0.001457	0.6487	0.6994	0.9569	0.05115	0.141	0.1249	0.06657	0.0004628	0.0005135	0.9	-0.1282	0.694	-0.8504	0.694	-0.8066	-2.981	-0.8504	-0.1282	-0.8066	351455097153301	35.24867974	-97.2594733
351455097153301	235		7.7	1.99526E-05	5	9.61611E-05	0.001659	0.6238	0.6994	0.9569		0.141	0.1978	0.06657	0.000436	0.0005055	0.9	0.1006	1.171	-0.3738	1.171	-0.5588	-2.807	-0.3738	0.1006	-0.5588	351455097153301	35.24867974	-97.2594733
351455097153301	255		8.2	6.30957E-06	5	9.61611E-05	0.001902	0.7485	0.8229	0.9569	0.05115	0.2257	0.05205	0.06657	0.0005117	0.0005871	0.9	0.7189	2.403	0.8584	2.403	0.05509	-3.331	0.8584	0.7189	0.05509	351455097153301	35.24867974	-97.2594733
351455097153301	315		8.2	6.30957E-06	5	9.61611E-05	0.001801	0.7984	0.8229	0.87	0.05115	0.1692	0.1041	0.08322	0.0005453	0.000586	0.9	0.7224	2.381	0.837	2.381	0.03021	-3.004	0.837	0.7224	0.03021	351455097153301	35.24867974	-97.2594733
351455097153301	405		7.7	1.99526E-05	5	9.61611E-05	0.001983	0.5489	0.576	2.131		0.2257	0.05205	0.06657	0.0003826	0.0004158	0.9	0.1206	1.183	-0.3617	1.183	-0.5667	-3.442	-0.3617	0.1206	-0.5667	351455097153301	35.24867974	-97.2594733
351455097153301	595		7.8	1.58489E-05	80	0.001538577	0.002935	0.1248	0.1646	13.66	0.05115	4.795	1.01	0.2829	0.00006786	0.00009635	0.7	-0.3801	0.2974	-1.247	0.2974	-0.9513	-2.957	-1.247	-0.3801	-0.9513	351455097153301	35.24867974	-97.2594733
351455097153301	615		7.6	2.51189E-05	80	0.001538577	0.002834	0.2994	0.1646	18.49		7.898	1.863	0.3162	0.0001476	0.00008848	1.7	-0.266	0.151	-1.393	0.151	-1.212	-2.392	-1.393	-0.266	-1.212	351455097153301	35.24867974	-97.2594733
351455097153301	455		7.4	3.98107E-05	110	0.002115543	0.002429	0.07485	0.2057	6.481		0.3949	0.1353	0.3495	0.00005005	0.0001432	0.3	-0.9744	-0.5869	-2.131	-0.5869	-1.241	-3.895	-2.131	-0.9744	-1.241	351455097153301	35.24867974	-97.2594733
351455097153301	475		7.7	1.99526E-05	120	0.002307865	0.00257	0.1248	0.2469	7.351	0.05115	0.7334	0.177	0.4327	0.00008081	0.0001675	0.5	-0.4463	0.3292	-1.215	0.3292	-0.8533	-3.584	-1.215	-0.4463	-0.8533	351455097153301	35.24867974	-97.2594733
351455097153301	515		7.6	2.51189E-05	130	0.002500188	0.002712	0.1248	0.288	7.917	0.05115	1.1	0.2603	0.4827	0.00007895	0.0001915	0.4	-0.5347	0.2207	-1.324	0.2207	-0.8734	-3.436	-1.324	-0.5347	-0.8734	351455097153301	35.24867974	-97.2594733
351518096511501	<200	18.6	6.4	0.000398107	0.49	9.42378E-06	0.001464	1.05	0.3497	0.6133	0.01637	0.3808	0.204	0.3944	0.0007474	0.0002558	2.9	-1.105	-1.809	-3.402	-1.809	-2.373	-2.554	-3.402	-1.105	-2.373	351518096511501	35.25505556	-96.8541944
351536096545501	<165	18.8	7.2	6.30957E-05	1.3	2.50019E-05	0.002764	1.367	0.9052	1.083	0.03478	0.3413	0.3331	0.3245	0.0008792	0.0006076	1.4	0.03114	0.7693	-0.8215	0.7693	-0.9295	-2.322	-0.8215	0.03114	-0.9295	351536096545501	35.26005556	-96.9154167
351537097180201	115		7.5	3.16228E-05	5	9.61611E-05	0.002155	0.8733	0.7817	2.088	0.05115	0.7616	0.1249	0.1165	0.0005842	0.0005439	1.1	0.1359	1.146	-0.3984	1.146	-0.6187	-2.91	-0.3984	0.1359	-0.6187	351537097180201	35.26034559	-97.3008635
351537097180201	160		7.6	2.51189E-05	5	9.61611E-05	0.001943	0.8234	0.864	1.522	0.05115	0.3949	0.05205	0.2829	0.000565	0.0006141	0.9	0.1774	1.296	-0.2481	1.296	-0.5099	-3.299	-0.2481	0.1774	-0.5099	351537097180201	35.26034559	-97.3008635
351537097180201	185		7.6	2.51189E-05	5	9.61611E-05	0.001923	0.8234	0.8229	1.131	0.05115	0.4231	0.05205	0.08322	0.0005686	0.0005883	1	0.1766	1.273	-0.2711	1.273	-0.5321	-3.293	-0.2711	0.1766	-0.5321	351537097180201	35.26034559	-97.3008635
351537097180201	215		7.5	3.16228E-05	5	9.61611E-05	0.001983	0.9232	0.9052	0.783	0.05115	0.3667	0.05205	0.08322	0.0006348	0.0006445	1	0.1375	1.187	-0.3575	1.187	-0.5794	-3.252	-0.3575	0.1375	-0.5794	351537097180201	35.26034559	-97.3008635
351537097180201	295		7.6	2.51189E-05	5	9.61611E-05	0.001943	0.8234	0.8229	1.087	0.05115	0.3103	0.05205	0.06657	0.0005692	0.0005889	1	0.1818	1.284	-0.2608	1.284	-0.527	-3.292	-0.2608	0.1818	-0.527	351537097180201	35.26034559	-97.3008635
351537097180201	335		7.9	1.25893E-05	5	9.61611E-05	0.001781	0.9481	0.9875	0.6525	0.05115	0.3667	0.05205	0.1165	0.0006514	0.0007035	0.9	0.4977	1.934	0.3897	1.934	-0.1924	-3.244	0.3897	0.4977	-0.1924	351537097180201	35.26034559	-97.3008635
351537097180201	455		7.9	1.25893E-05	5	9.61611E-05	0.001801	1.098	1.07	0.609	0.05115	0.3949	0.05205	0.09986	0.000747	0.0007554	1	0.5598	2.03	0.4854	2.03	-0.1588	-3.196	0.4854	0.5598	-0.1588	351537097180201	35.26034559	-97.3008635
351537097180201	495		7.5	3.16228E-05	5	9.61611E-05	0.002024	0.998	1.029	0.435	0.05115	0.3949	0.05205	0.09986	0.0006819	0.0007286	0.9	0.1761	1.286	-0.2581	1.286	-0.5187	-3.229	-0.2581	0.1761	-0.5187	351537097180201	35.26034559	-97.3008635
351537097180201	595		7.5	3.16228E-05	5	9.61611E-05	0.001902	0.998	0.9463	0.3045	0.05115	0.1974	0.05205	0.1831	0.0006907	0.0006771	1	0.1561	1.209	-0.3355	1.209	-0.576	-3.218	-0.3355	0.1561	-0.576	351537097180201	35.26034559	-97.3008635
351537097180201	615		7.7	1.99526E-05	5	9.61611E-05	0.001983	0.6737	0.6994	1.392	0.05115	0.1692	0.05205	0.08322	0.0004687	0.0005039	0.9	0.2077	1.352	-0.1923	1.352	-0.4843	-3.363	-0.1923	0.2077	-0.4843	351537097180201	35.26034559	-97.3008635
351537097180201	765		7.8	1.58489E-05	5	9.61611E-05	0.002186	0.6986	0.6994	2.175	0.05115	0.3667	0.05205	0.09986	0.0004745	0.0004943	1	0.352	1.627	0.08258	1.627	-0.3538	-3.365	0.08258	0.352	-0.3538	351537097180201	35.26034559	-97.3008635
351537097180201	515		7.4	3.98107E-05	10	0.000192322	0.001953	1.272	1.399	0.5655	0.1023	0.3667	0.05205	0.6158	0.0008512	0.0009703	0.9	0.1523	1.267	-0.2776	1.267	-0.5143	-3.163	-0.2776	0.1523	-0.5143	351537097180201	35.26034559	-97.3008635
351537097180201	555		7.4	3.98107E-05	10	0.000192322	0.0017	0.8982	0.8229	0.522	0.05115	0.2257	0.05205	0.09986	0.0006321	0.0005969	1.1	-0.02862	0.8232	-0.7212	0.8232	-0.777	-3.245	-0.7212	-0.02862	-0.777	351537097180201	35.26034559	-97.3008635
351537097180201	655		8.3	5.01187E-06	10	0.000192322	0.001619	0.7236	0.7406	2.914		1.241	0.1457	0.1498	0.00048	0.0005144	0.9	0.715	2.365	0.821	2.365	0.02161	-2.92	0.821	0.715	0.02161	351537097180201	35.26034559	-97.3008635
351537097180201	795		7.8	1.58489E-05	20	0.000384644	0.00158	1.871	1.481	21.97	0.07673	19.97	2.311	0.1165	0.0008447	0.0007438	1.1	0.4137	1.678	0.1331	1.678	-0.365	-1.642	0.1331	0.4137	-0.365	351537097180201	35.26034559	-97.3008635
351541097245301	440	19.5	8	0.00001	50	0.000961611	0.00193	0.7036	0.9957	1.209	0.06394	0.2821	0.09473		0.0004824	0.0007081	0.7	0.4256	1.89	0.304	1.89	-0.1993	-3.095	0.304	0.4256	-0.1993	351541097245301	35.26132778	-97.4146472
351541097245301	500	19.6	7.7	1.99526E-05	60	0.001153933	0.001838	0.5639	0.8064	1.636	0.05499	0.22	0.09473		0.0003944	0.0005822	0.7	0.02412	1.09	-0.495	1.09	-0.597	-3.168	-0.495	0.02412	-0.597	351541097245301	35.26132778	-97.4146472
351541097245301	550	19.2	8	0.00001	60	0.001153933	0.001839	0.5314	0.7612	1.779	0.05294	0.2257	0.1031		0.0003697	0.0005484	0.7	0.2877	1.617	0.02889	1.617	-0.3363	-3.155	0.02889	0.2877	-0.3363	351541097245301	35.26132778	-97.4146472
351541097245301	595	19.3	8.1	7.94328E-06	60	0.001153933	0.00192	0.5289	0.7529	1.757	0.05269	0.2257	0.102		0.0003655	0.0005402	0.7	0.4015	1.843	0.2562	1.843	-0.2228	-3.165	0.2562	0.4015	-0.2228	351541097245301	35.26132778	-97.4146472
351541097245301	-999	18.1	7.7	1.99526E-05	60	0.001153933	0.001871	0.5564	0.7982	1.662	0.05525	0.2341	0.101		0.0003889	0.000576	0.7	0.003733	1.041	-0.5548	1.041	-0.6346	-3.144	-0.5548	0.003733	-0.6346	351541097245301	35.26132778	-97.4146472
351542097262801	480		8.9	1.25893E-06	30	0.000576966	0.002864	0.04391	0.02715	6.394	0.01228	0.2821	0.4154		0.00002399	0.00001669	1.4	0.2382	1.224	-0.3204	1.224	-0.6429	-3.726	-0.3204	0.2382	-0.6429	351542097262801	35.26152778	-97.4410306
351542097262801	525		9	0.000001	30	0.000576966	0.002884	0.04366	0.02715	6.307	0.01279	0.3103	0.4123		0.00002302	0.00001635	1.4	0.3135	1.384	-0.1606	1.384	-0.5586	-3.747	-0.1606	0.3135	-0.5586	351542097262801	35.26152778	-97.4410306
351542097262801	540		8.9	1.25893E-06	30	0.000576966	0.002823	0.04915	0.03003	6.394	0.01253	0.3103	0.4039		0.00002696	0.00001852	1.5	0.2828	1.308	-0.2368	1.308	-0.604	-3.687	-0.2368	0.2828	-0.604	351542097262801	35.26152778	-97.4410306
351542097262801	560		9	0.000001	30	0.000576966	0.002793	0.0484	0.03003	6.481	0.0133	0.3103	0.4008		0.00002574	0.00001818	1.4	0.3479	1.45	-0.09417	1.45	-0.5265	-3.711	-0.09417	0.3479	-0.5265	351542097262801	35.26152778	-97.4410306
351542097262801	-999	17.7	8.8	1.58489E-06	30	0.000576966	0.002807	0.04616	0.02839	6.481	0.01279	0.3103	0.4081		0.00002711	0.00001826	1.5	0.09114	0.8715	-0.7276	0.8715	-0.8943	-3.669	-0.7276	0.09114	-0.8943	351542097262801	35.26152778	-97.4410306
351542097262801	620		9	0.000001	50	0.000961611	0.002833	0.05714	0.03003	6.568	0.0133	0.3949	0.4008		0.00003023	0.00001812	1.7	0.4234	1.53	-0.01468	1.53	-0.5225	-3.643	-0.01468	0.4234	-0.5225	351542097262801	35.26152778	-97.4410306
351542097262801	645		9	0.000001	50	0.000961611	0.002833	0.05414	0.02839	6.525	0.01356	0.3385	0.4018		0.00002866	0.00001714	1.7	0.4006	1.483	-0.06139	1.483	-0.5463	-3.665	-0.06139	0.4006	-0.5463	351542097262801	35.26152778	-97.4410306
351543097200601	115		8.1	7.94328E-06	5	9.61611E-05	0.001983	1.173	1.317	0.7395	0.05115	0.3385	0.1249	0.1498	0.0007707	0.0009044	0.9	0.8079	2.591	1.046	2.591	0.1539	-2.817	1.046	0.8079	0.1539	351543097200601	35.26201176	-97.3353088
351543097200601	155		7.6	2.51189E-05	5	9.61611E-05	0.002388	1.148	1.275	0.609	0.05115	0.3385	0.05205	0.08322	0.0007597	0.0008789	0.9	0.39	1.749	0.2043	1.749	-0.2702	-3.203	0.2043	0.39	-0.2702	351543097200601	35.26201176	-97.3353088
351543097200601	213		7.6	2.51189E-05	5	9.61611E-05	0.002226	1.123	1.234	0.5655	0.05115	0.3103	0.05205	0.1165	0.0007505	0.0008573	0.9	0.3551	1.673	0.129	1.673	-0.3106	-3.204	0.129	0.3551	-0.3106	351543097200601	35.26201176	-97.3353088
351543097200601	235		7.6	2.51189E-05	5	9.61611E-05	0.002793	1.148	1.234	0.609	0.05115	0.3103	0.05205	0.08322	0.0007486	0.0008416	0.9	0.4513	1.859	0.3144	1.859	-0.2214	-3.209	0.3144	0.4513	-0.2214	351543097200601	35.26201176	-97.3353088
351543097200601	275		7.6	2.51189E-05	5	9.61611E-05	0.002257	1.073	1.193	0.522	0.05115	0.2821	0.1353	0.09986	0.0007126	0.0008247	0.9	0.3392	1.647	0.1027	1.647	-0.3209	-2.808	0.1027	0.3392	-0.3209	351543097200601	35.26201176	-97.3353088
351543097200601	310		7.7	1.99526E-05	5	9.61611E-05	0.002257	1.073	1.193	0.522	0.05115	0.2539	0.05205	0.09986	0.0007179	0.0008306	0.9	0.4417	1.852	0.3076	1.852	-0.2185	-3.219	0.3076	0.4417	-0.2185	351543097200601	35.26201176	-97.3353088
351543097200601	355		8	0.00001	5	9.61611E-05	0.002024	1.123	1.275	0.609	0.05115	0.3103	0.05205	0.1997	0.0007483	0.0008856	0.8	0.7073	2.393	0.8486	2.393	0.0569	-3.206	0.8486	0.7073	0.0569	351543097200601	35.26201176	-97.3353088
351543097200601	395		7.7	1.99526E-05	5	9.61611E-05	0.002277	1.048	1.152	0.696	0.05115	0.2821	0.05205	0.1165	0.0007008	0.0008018	0.9	0.4353	1.834	0.29	1.834	-0.2297	-3.227	0.29	0.4353	-0.2297	351543097200601	35.26201176	-97.3353088
351543097200601	445		7.7	1.99526E-05	5	9.61611E-05	0.002267	1.073	1.193	0.5655	0.07673	0.3103	0.05205	0.3662	0.0007166	0.0008293	0.9	0.4427	1.854	0.3096	1.854	-0.2174	-3.22	0.3096	0.4427	-0.2174	351543097200601	35.26201176	-97.3353088
351543097200601	475		7.5	3.16228E-05	5	9.61611E-05	0.002348	1.023	1.152	0.6525	0.05115	0.2821	0.05205	0.1331	0.0006852	0.0008023	0.9	0.2407	1.455	-0.08922	1.455	-0.4143	-3.236	-0.08922	0.2407	-0.4143	351543097200601	35.26201176	-97.3353088
351543097200601	535		7.9	1.25893E-05	5	9.61611E-05	0.002064	1.048	1.193	0.6525	0.05115	0.2821	0.1041	0.1331	0.0006993	0.0008292	0.8	0.5893	2.158	0.6135	2.158	-0.06018	-2.928	0.6135	0.5893	-0.06018	351543097200601	35.26201176	-97.3353088
351543097200601	615		7.9	1.25893E-05	5	9.61611E-05	0.002348	1.023	1.111	1.522	0.05115	0.7898	0.1145	0.09986	0.0006663	0.0007577	0.9	0.6227	2.207	0.6622	2.207	-0.04495	-2.91	0.6622	0.6227	-0.04495	351543097200601	35.26201176	-97.3353088
351543097200601	635		8	0.00001	5	9.61611E-05	0.002135	1.023	1.152	0.87	0.05115	0.3103	0.05205	0.1498	0.0006818	0.0008013	0.9	0.6915	2.358	0.8141	2.358	0.03815	-3.238	0.8141	0.6915	0.03815	351543097200601	35.26201176	-97.3353088
351543097200601	655		7.7	1.99526E-05	5	9.61611E-05	0.002186	1.048	1.152	2.044	0.05115	1.072	0.1353	0.1498	0.0006824	0.0007833	0.9	0.4032	1.772	0.2271	1.772	-0.2604	-2.833	0.2271	0.4032	-0.2604	351543097200601	35.26201176	-97.3353088
351543097200601	675		8.3	5.01187E-06	5	9.61611E-05	0.001538	1.048	1.152	0.7395	0.05115	0.3385	0.05205	0.09986	0.0007103	0.0008133	0.9	0.8598	2.684	1.139	2.684	0.1951	-3.217	1.139	0.8598	0.1951	351543097200601	35.26201176	-97.3353088
351543097200601	695		8.6	2.51189E-06	80	0.001538577	0.003007	0.1747	0.1646	23.27		13.82	1.624	0.1498	0.00007851	0.00008361	0.9	0.4555	1.844	0.2993	1.844	-0.2407	-2.75	0.2993	0.4555	-0.2407	351543097200601	35.26201176	-97.3353088
351550097283801	490		9	0.000001	20	0.000384644	0.00256	0.04017	0.03168	5.742	0.01662	0.11	0.1426		0.00002261	0.00002014	1.1	0.2582	1.371	-0.173	1.371	-0.5156	-4.203	-0.173	0.2582	-0.5156	351550097283801	35.26395428	-97.4775348
351550097283801	515		8.8	1.58489E-06	20	0.000384644	0.002611	0.05589	0.04732	5.437	0.01867	0.11	0.1291		0.00003342	0.00003117	1.1	0.254	1.383	-0.1615	1.383	-0.4999	-4.076	-0.1615	0.254	-0.4999	351550097283801	35.26395428	-97.4775348
351550097283801	535		8.6	2.51189E-06	20	0.000384644	0.00251	0.05115	0.04156	5.481	0.02046	0.1044	0.1291		0.0000322	0.0000282	1.1	0.03247	0.9127	-0.6317	0.9127	-0.7486	-4.09	-0.6317	0.03247	-0.7486	351550097283801	35.26395428	-97.4775348
351550097283801	560		8.9	1.25893E-06	20	0.000384644	0.00257	0.0489	0.04032	5.481	0.01816	0.1072	0.1312		0.00002852	0.00002619	1.1	0.2706	1.41	-0.1349	1.41	-0.4899	-4.137	-0.1349	0.2706	-0.4899	351550097283801	35.26395428	-97.4775348
351550097283801	595		8.7	1.99526E-06	20	0.000384644	0.00255	0.05314	0.04032	5.481	0.01842	0.1072	0.1343		0.00003268	0.00002699	1.2	0.1406	1.103	-0.441	1.103	-0.666	-4.067	-0.441	0.1406	-0.666	351550097283801	35.26395428	-97.4775348
351550097283801	-999	19.9	8.9	1.25893E-06	20	0.000384644	0.002488	0.0494	0.0395	5.481	0.01739	0.1072	0.1364		0.00002995	0.00002632	1.1	0.2106	1.239	-0.3432	1.239	-0.6321	-4.089	-0.3432	0.2106	-0.6321	351550097283801	35.26395428	-97.4775348
351550097283801	615		8.8	1.58489E-06	30	0.000576966	0.002479	0.0514	0.03991	5.437	0.01714	0.1269	0.1322		0.00003107	0.00002648	1.2	0.2004	1.237	-0.3077	1.237	-0.5925	-4.095	-0.3077	0.2004	-0.5925	351550097283801	35.26395428	-97.4775348
351611097042001	<94.6	18	6.3	0.000501187	2.5	4.80805E-05	0.0007727	0.6487	0.5349	0.9134	0.07929	0.677	0.3019	0.2663	0.0004702	0.0003971	1.2	-1.69	-2.59	-4.187	-2.59	-2.573	-2.569	-4.187	-1.69	-2.573	351611097042001	35.2697924	-97.0725248
351617097072801	<50	17	6.9	0.000125893	2.5	4.80805E-05	0.002808	1.422	1.358	0.5655	0.02813	0.4231	0.1874	0.2496	0.0009177	0.0009132	1	-0.2703	0.3136	-1.291	0.3136	-1.095	-2.568	-1.291	-0.2703	-1.095	351617097072801	35.27145846	-97.1247482
351624097082401	<210	17	7.3	5.01187E-05	2.5	4.80805E-05	0.002788	1.397	1.275	0.4785	0.04092	0.2821	0.05413	0.2496	0.0009172	0.0008707	1.1	0.1254	1.085	-0.5197	1.085	-0.7198	-3.102	-0.5197	0.1254	-0.7198	351624097082401	35.2734027	-97.1403042
351630097171601	-999		6.1	0.000794328	5	9.61611E-05	0.001447	0.3244	0.3292	0.2175		0.3103	0.1041		0.0002436	0.0002533	1	-1.798	-2.673	-4.217	-2.673	-2.504	-3.29	-4.217	-1.798	-2.504	351630097171601	35.2750676	-97.2880855
351630097190001	<120		6.8	0.000158489	5	9.61611E-05	0.001346	0.9731	0.864	0.2175		0.4231	0.1041		0.0006903	0.0006297	1.1	-0.6891	-0.5128	-2.057	-0.5128	-1.452	-2.909	-2.057	-0.6891	-1.452	351630097190001	35.27506724	-97.3169752
351632097200601	115		7.5	3.16228E-05	5	9.61611E-05	0.002287	1.372	1.111	0.3045	0.05115	0.2257	0.05205	0.08322	0.0009152	0.0007703	1.2	0.3528	1.536	-0.008342	1.536	-0.4455	-3.124	-0.008342	0.3528	-0.4455	351632097200601	35.27562255	-97.335309
351632097200601	155		7.5	3.16228E-05	5	9.61611E-05	0.002327	1.372	1.152	0.3045	0.05115	0.2257	0.05205	0.08322	0.0009124	0.0007967	1.1	0.3587	1.564	0.01945	1.564	-0.4237	-3.127	0.01945	0.3587	-0.4237	351632097200601	35.27562255	-97.335309
351632097200601	215		7.6	2.51189E-05	5	9.61611E-05	0.002337	1.272	1.152	0.3045	0.05115	0.2257	0.05205	0.1831	0.0008472	0.0007984	1.1	0.4285	1.736	0.1921	1.736	-0.3208	-3.154	0.1921	0.4285	-0.3208	351632097200601	35.27562255	-97.335309
351632097200601	335		7.6	2.51189E-05	5	9.61611E-05	0.002287	1.272	1.111	0.3045		0.2257	0.05205	0.08322	0.0008506	0.0007726	1.1	0.4212	1.706	0.1615	1.706	-0.3441	-3.15	0.1615	0.4212	-0.3441	351632097200601	35.27562255	-97.335309
351632097200601	355		7.6	2.51189E-05	5	9.61611E-05	0.002216	1.272	1.111	0.3045	0.05115	0.2257	0.05205	0.08322	0.0008527	0.000774	1.1	0.4087	1.681	0.1361	1.681	-0.3569	-3.149	0.1361	0.4087	-0.3569	351632097200601	35.27562255	-97.335309
351632097200601	375		7.6	2.51189E-05	5	9.61611E-05	0.002206	1.272	1.152	0.348	0.05115	0.2257	0.05205	0.08322	0.0008515	0.0008014	1.1	0.4057	1.69	0.1459	1.69	-0.3442	-3.152	0.1459	0.4057	-0.3442	351632097200601	35.27562255	-97.335309
351632097200601	395		7.5	3.16228E-05	5	9.61611E-05	0.002429	1.297	1.111	0.3915		0.2257	0.05205	0.09986	0.0008621	0.0007686	1.1	0.3533	1.562	0.01765	1.562	-0.4201	-3.147	0.01765	0.3533	-0.4201	351632097200601	35.27562255	-97.335309
351632097200601	415		7.6	2.51189E-05	5	9.61611E-05	0.002631	1.223	1.07	0.4785		0.2257	0.05205	0.09986	0.0008074	0.0007372	1.1	0.4593	1.784	0.24	1.784	-0.3037	-3.171	0.24	0.4593	-0.3037	351632097200601	35.27562255	-97.335309
351632097200601	435		7.6	2.51189E-05	5	9.61611E-05	0.002226	1.223	1.07	0.522		0.2257	0.05205	0.09986	0.0008209	0.0007463	1.1	0.3946	1.653	0.1087	1.653	-0.3703	-3.162	0.1087	0.3946	-0.3703	351632097200601	35.27562255	-97.335309
351632097200601	475		7.7	1.99526E-05	5	9.61611E-05	0.002105	1.248	1.07	0.3045	0.05115	0.2539	0.05205	0.06657	0.0008408	0.0007488	1.1	0.4799	1.815	0.2704	1.815	-0.2939	-3.152	0.2704	0.4799	-0.2939	351632097200601	35.27562255	-97.335309
351632097200601	515		7.8	1.58489E-05	5	9.61611E-05	0.002176	1.098	0.9052	1		0.2257	0.05205	0.08322	0.00074	0.0006347	1.2	0.5393	1.917	0.3729	1.917	-0.2508	-3.196	0.3729	0.5393	-0.2508	351632097200601	35.27562255	-97.335309
351632097200601	575		7.6	2.51189E-05	5	9.61611E-05	0.002317	1.098	0.9052	0.9569		0.2257	0.05205	0.08322	0.0007388	0.0006333	1.2	0.3678	1.574	0.0296	1.574	-0.4226	-3.197	0.0296	0.3678	-0.4226	351632097200601	35.27562255	-97.335309
351632097200601	615		7.6	2.51189E-05	5	9.61611E-05	0.002439	1.048	0.8229	3.567		2.003	0.2082	0.06657	0.0006635	0.000547	1.2	0.3382	1.498	-0.04657	1.498	-0.4692	-2.655	-0.04657	0.3382	-0.4692	351632097200601	35.27562255	-97.335309
351632097200601	635		7.7	1.99526E-05	5	9.61611E-05	0.002621	0.998	0.8229	4.393		2.454	0.2394	0.06657	0.0006184	0.0005379	1.1	0.4365	1.718	0.1734	1.718	-0.3476	-2.629	0.1734	0.4365	-0.3476	351632097200601	35.27562255	-97.335309
351632097200601	695		7.6	2.51189E-05	5	9.61611E-05	0.003036	0.998	0.8229	5.307		2.821	0.3227	0.08322	0.0005998	0.0005244	1.1	0.3857	1.618	0.07392	1.618	-0.3962	-2.52	0.07392	0.3857	-0.3962	351632097200601	35.27562255	-97.335309
351632097200601	715		8	0.00001	5	9.61611E-05	0.002439	0.9232	0.7406	11.05		8.18	1.083	0.08322	0.0004895	0.0004255	1.2	0.5874	2.019	0.4748	2.019	-0.197	-2.113	0.4748	0.5874	-0.197	351632097200601	35.27562255	-97.335309
351632097291801	<342	19.3	9.1	7.94328E-07	20	0.000384644	0.002997	0.03518	0.02304	8.352	0.008184	0.3385	0.6767		0.00001787	0.00001343	1.3	0.2295	1.206	-0.3815	1.206	-0.6885	-3.649	-0.3815	0.2295	-0.6885	351632097291801	35.27574167	-97.4887611
351632097292101	<400	18.9	8.8	1.58489E-06	10	0.000192322	0.003497	0.08483	0.05102	15.53	0.01049	0.8462	4.841		0.00003362	0.00002301	1.5	0.2667	1.237	-0.3531	1.237	-0.6968	-2.602	-0.3531	0.2667	-0.6968	351632097292101	35.27566667	-97.4891667
351633097241901	595		7.7	1.99526E-05	50	0.000961611	0.002206	0.5364	0.7159	2.284	0.05806	0.1664	0.09369		0.0003656	0.0005071	0.7	0.145	1.337	-0.2069	1.337	-0.4363	-3.216	-0.2069	0.145	-0.4363	351633097241901	35.27575278	-97.4052889
351633097241901	640		7.8	1.58489E-05	50	0.000961611	0.002267	0.489	0.6377	2.64	0.05294	0.1692	0.09786		0.0003317	0.0004504	0.7	0.2141	1.466	-0.078	1.466	-0.3765	-3.235	-0.078	0.2141	-0.3765	351633097241901	35.27575278	-97.4052889
351633097241901	680		7.7	1.99526E-05	50	0.000961611	0.00253	0.6512	0.8722	1.566	0.06266	0.1439	0.09473		0.0004361	0.0006093	0.7	0.2793	1.609	0.06469	1.609	-0.299	-3.146	0.06469	0.2793	-0.299	351633097241901	35.27575278	-97.4052889
351633097241901	415		8.5	3.16228E-06	60	0.001153933	0.001487	0.6512	0.8764	1.496	0.0619	0.141	0.09578		0.0004434	0.0006248	0.7	0.8396	2.733	1.189	2.733	0.2651	-3.125	1.189	0.8396	0.2651	351633097241901	35.27575278	-97.4052889
351633097241901	480		7.8	1.58489E-05	60	0.001153933	0.002236	0.6437	0.8599	1.522	0.06343	0.1439	0.09473		0.0004363	0.0006067	0.7	0.3258	1.7	0.1557	1.7	-0.2545	-3.143	0.1557	0.3258	-0.2545	351633097241901	35.27575278	-97.4052889
351633097241901	480		7.7	1.99526E-05	60	0.001153933	0.002206	0.6512	0.8764	1.505	0.06113	0.141	0.09473		0.0004428	0.0006193	0.7	0.2271	1.505	-0.03913	1.505	-0.3506	-3.137	-0.03913	0.2271	-0.3506	351633097241901	35.27575278	-97.4052889
351633097241901	520		7.8	1.58489E-05	60	0.001153933	0.002216	0.6437	0.8599	1.518	0.06241	0.1467	0.09473		0.0004367	0.0006071	0.7	0.3223	1.693	0.1486	1.693	-0.2581	-3.142	0.1486	0.3223	-0.2581	351633097241901	35.27575278	-97.4052889
351633097241901	520		7.5	3.16228E-05	60	0.001153933	0.002216	0.6487	0.8722	1.501	0.06087	0.1439	0.09786		0.0004423	0.0006172	0.7	0.03013	1.11	-0.4342	1.11	-0.5487	-3.124	-0.4342	0.03013	-0.5487	351633097241901	35.27575278	-97.4052889
351633097241901	520		7.7	1.99526E-05	60	0.001153933	0.002165	0.5938	0.7817	1.796	0.06113	0.1551	0.09994		0.0004053	0.0005543	0.7	0.1816	1.404	-0.1399	1.404	-0.4059	-3.146	-0.1399	0.1816	-0.4059	351633097241901	35.27575278	-97.4052889
351633097241901	520		7.3	5.01187E-05	60	0.001153933	0.002115	0.6462	0.8681	1.514	0.0619	0.1551	0.09682		0.0004435	0.0006171	0.7	-0.1877	0.6734	-0.871	0.6734	-0.7678	-3.126	-0.871	-0.1877	-0.7678	351633097241901	35.27575278	-97.4052889
351633097241901	575		7.6	2.51189E-05	60	0.001153933	0.002135	0.6462	0.864	1.553	0.06394	0.158	0.0989		0.0004413	0.0006124	0.7	0.1125	1.273	-0.2719	1.273	-0.4688	-3.119	-0.2719	0.1125	-0.4688	351633097241901	35.27575278	-97.4052889
351633097241901	595		7.8	1.58489E-05	60	0.001153933	0.002327	0.4691	0.613	2.358	0.05346	0.1326	0.1114		0.0003184	0.0004335	0.7	0.2085	1.456	-0.088	1.456	-0.3809	-3.193	-0.088	0.2085	-0.3809	351633097241901	35.27575278	-97.4052889
351633097241901	595		7.7	1.99526E-05	60	0.001153933	0.002176	0.6462	0.8681	1.549	0.06138	0.141	0.09578		0.0004399	0.0006141	0.7	0.2184	1.487	-0.05744	1.487	-0.3603	-3.135	-0.05744	0.2184	-0.3603	351633097241901	35.27575278	-97.4052889
351633097241901	645		7.8	1.58489E-05	60	0.001153933	0.002196	0.6437	0.864	1.544	0.06113	0.141	0.09578		0.0004369	0.0006102	0.7	0.3185	1.687	0.143	1.687	-0.2599	-3.137	0.143	0.3185	-0.2599	351633097241901	35.27575278	-97.4052889
351633097241901	670		8.6	2.51189E-06	60	0.001153933	0.00259	0.2203	0.2868	4.567	0.03555	0.2059	0.102		0.0001376	0.0001934	0.7	0.673	2.399	0.8546	2.399	0.09719	-3.579	0.8546	0.673	0.09719	351633097241901	35.27575278	-97.4052889
351633097241901	-999	17.6	7.4	3.98107E-05	60	0.001153933	0.002217	0.5614	0.7488	2.105	0.05934	0.1608	0.09786		0.0003874	0.0005342	0.7	-0.2309	0.5379	-1.062	0.5378	-0.9065	-3.162	-1.062	-0.2309	-0.9065	351633097241901	35.27575278	-97.4052889
351633097241901	-999	17.7	7.7	1.99526E-05	60	0.001153933	0.003061	0.5314	0.7118	2.397	0.05448	0.1974	0.09994		0.0003522	0.0004927	0.7	0.1659	1.338	-0.2607	1.338	-0.5022	-3.198	-0.2607	0.1659	-0.5022	351633097241901	35.27575278	-97.4052889
351633097241901	645		7.9	1.25893E-05	70	0.001346255	0.002368	0.519	0.6748	2.41	0.05448	0.1608	0.1114		0.0003486	0.0004734	0.7	0.3531	1.744	0.1999	1.744	-0.2375	-3.16	0.1999	0.3531	-0.2375	351633097241901	35.27575278	-97.4052889
351633097241901	595		8.1	7.94328E-06	80	0.001538577	0.002378	0.3493	0.4444	3.341	0.04757	0.1382	0.128		0.0002332	0.0003112	0.7	0.3796	1.79	0.2455	1.79	-0.2185	-3.258	0.2455	0.3796	-0.2185	351633097241901	35.27575278	-97.4052889
351633097241901	645		8.3	5.01187E-06	80	0.001538577	0.002459	0.3219	0.4073	3.693	0.04297	0.189	0.1333		0.0002103	0.0002815	0.7	0.5447	2.121	0.5769	2.121	-0.0522	-3.285	0.5769	0.5447	-0.0522	351633097241901	35.27575278	-97.4052889
351633097241901	680		8.2	6.30957E-06	80	0.001538577	0.00257	0.3767	0.4896	3.593	0.04578	0.2341	0.1218		0.000246	0.0003374	0.7	0.5328	2.108	0.5639	2.108	-0.05335	-3.264	0.5639	0.5328	-0.05335	351633097241901	35.27575278	-97.4052889
351633097241901	-999	18	8.2	6.30957E-06	80	0.001538577	0.002694	0.3443	0.4485	4.05	0.04195	0.3103	0.1249		0.0002264	0.00031	0.7	0.4188	1.837	0.2399	1.837	-0.2548	-3.278	0.2399	0.4188	-0.2548	351633097241901	35.27575278	-97.4052889
351633097241901	-999	18	8.6	2.51189E-06	90	0.001730899	0.002715	0.257	0.3213	4.698	0.03504	0.3667	0.1343		0.0001622	0.0002174	0.7	0.6667	2.323	0.7263	2.323	-0.01628	-3.384	0.7263	0.6667	-0.01628	351633097241901	35.27575278	-97.4052889
351633097241901	660		9.1	7.94328E-07	120	0.002307865	0.003603	0.07061	0.08146	8.134	0.01202	1.044	0.1551		0.00003363	0.000046	0.7	0.6557	2.353	0.8083	2.353	0.0682	-4.027	0.8083	0.6557	0.0682	351633097241901	35.27575278	-97.4052889
351633097241901	670		8.9	1.25893E-06	120	0.002307865	0.003511	0.12	0.1551	7.743	0.01918	1.044	0.1551		0.00006273	0.00009264	0.7	0.7371	2.549	1.004	2.549	0.1829	-3.758	1.004	0.7371	0.1829	351633097241901	35.27575278	-97.4052889
351634097025601	<170	17.4	6.8	0.000158489	0.51	9.80843E-06	0.003225	1.874	1.654	1.057	0.04783	2.082	0.2426	0.2447	0.00114	0.00106	1.1	-0.2167	0.3936	-1.208	0.3936	-1.066	-2.397	-1.208	-0.2167	-1.066	351634097025601	35.27625	-97.0489444
351638097175301	<132.20	17	6.8	0.000158489	2.5	4.80805E-05	0.001506	0.8234	0.7406	0.3306	0.0179	0.1946	0.06246	0.2829	0.0005955	0.0005489	1.1	-0.8161	-0.8111	-2.415	-0.8111	-1.674	-3.168	-2.415	-0.8161	-1.674	351638097175301	35.27728966	-97.2983636
351645097253801	<730	18.4	7.7	1.99526E-05	30	0.000576966	0.002521	0.9232	1.247	0.8482	0.0619	0.3949	0.07912		0.0006141	0.000863	0.7	0.3291	1.671	0.07717	1.671	-0.3283	-3.092	0.07717	0.3291	-0.3283	351645097253801	35.2791222	-97.4272306
351645097253801	<730	18.3	7.7	1.99526E-05	40	0.000769288	0.002033	0.6462	0.8805	1.296	0.05422	0.3949	0.07912		0.0004472	0.0006303	0.7	0.102	1.218	-0.3769	1.218	-0.5553	-3.198	-0.3769	0.102	-0.5553	351645097253801	35.2791222	-97.4272306
351645097253801	<730	18.5	8.8	1.58489E-06	80	0.001538577	0.002378	0.06637	0.072	4.337	0.02097	0.06487	0.1239		0.00004226	0.00004961	0.9	0.2299	1.395	-0.1979	1.395	-0.5043	-3.973	-0.1979	0.2299	-0.5043	351645097253801	35.2791222	-97.4272306
351645097253801	<730	19	9	0.000001	80	0.001538577	0.002977	0.03368	0.02222	5.785	0.01535	0.09026	0.1791		0.00001899	0.00001413	1.3	0.1678	1.076	-0.5135	1.076	-0.7585	-4.174	-0.5135	0.1678	-0.7585	351645097253801	35.2791222	-97.4272306
351645097253801	<730	18.6	8.9	1.25893E-06	80	0.001538577	0.00313	0.03817	0.02427	6.525	0.01688	0.0959	0.2009		0.00002181	0.00001547	1.4	0.1506	1.018	-0.5742	1.018	-0.8014	-4.07	-0.5742	0.1506	-0.8014	351645097253801	35.2791222	-97.4272306
351645097253801	<730	18.8	9	0.000001	80	0.001538577	0.003191	0.03244	0.0181	6.742	0.01969	0.0959	0.1988		0.00001784	0.00001128	1.6	0.1653	0.999	-0.5918	0.999	-0.834	-4.164	-0.5918	0.1653	-0.834	351645097253801	35.2791222	-97.4272306
351645097253801	<730	18.8	9	0.000001	100	0.001923221	0.003577	0.02994	0.01769	7.83	0.01688	0.1608	0.2905		0.00001572	0.00001063	1.5	0.1562	1.01	-0.5808	1.01	-0.8139	-4.066	-0.5808	0.1562	-0.8139	351645097253801	35.2791222	-97.4272306
351648097285101	500		9	0.000001	20	0.000384644	0.002752	0.04117	0.04073	5.394	0.01202	0.1241	0.1228		0.00002284	0.00002567	0.9	0.294	1.544	-0.0003046	1.544	-0.3787	-4.264	-0.0003046	0.294	-0.3787	351648097285101	35.27423177	-97.4811462
351648097285101	525		9.1	7.94328E-07	20	0.000384644	0.002783	0.03867	0.03703	5.611	0.01202	0.141	0.1551		0.00002043	0.00002263	0.9	0.3378	1.625	0.08078	1.625	-0.3414	-4.213	0.08078	0.3378	-0.3414	351648097285101	35.27423177	-97.4811462
351648097285101	565		9.2	6.30957E-07	20	0.000384644	0.003046	0.02969	0.02263	6.438	0.009975	0.2228	0.2863		0.00001429	0.00001295	1.1	0.3038	1.47	-0.07448	1.47	-0.4626	-4.113	-0.07448	0.3038	-0.4626	351648097285101	35.27423177	-97.4811462
351648097285101	605		9.1	7.94328E-07	20	0.000384644	0.002995	0.03169	0.02592	6.307	0.011	0.2087	0.2582		0.00001613	0.00001537	1	0.2644	1.413	-0.1313	1.413	-0.4801	-4.103	-0.1313	0.2644	-0.4801	351648097285101	35.27423177	-97.4811462
351648097285101	625		9.2	6.30957E-07	20	0.000384644	0.003218	0.0237	0.01317	7.047	0.008696	0.2821	0.3727		0.00001108	0.000007356	1.5	0.2147	1.157	-0.3874	1.157	-0.6865	-4.115	-0.3874	0.2147	-0.6865	351648097285101	35.27423177	-97.4811462
351648097285101	645		9.2	6.30957E-07	20	0.000384644	0.003167	0.0242	0.01317	7.09	0.008696	0.2792	0.3654		0.00001138	0.000007386	1.5	0.2196	1.157	-0.3875	1.157	-0.6915	-4.112	-0.3875	0.2196	-0.6915	351648097285101	35.27423177	-97.4811462
351648097285101	<674	17.6	9.1	7.94328E-07	20	0.000384644	0.003082	0.0499	0.02921	6.394	0.01074	0.22	0.2748		0.00002674	0.00001793	1.5	0.399	1.485	-0.1153	1.485	-0.5897	-3.847	-0.1153	0.399	-0.5897	351648097285101	35.27423177	-97.4811462
351648097285101	<674	18.5	9	0.000001	29	0.000557734	0.003171	0.02994	0.01975	7.395	0.01279	0.3103	0.3852	0.1648	0.00001611	0.00001203	1.3	0.1117	0.9622	-0.6309	0.9622	-0.8191	-3.928	-0.6309	0.1117	-0.8191	351648097285101	35.27423177	-97.4811462
351649096584801	<90	18.3	6.9	0.000125893	12.2	0.000234633	0.002958	0.4042	0.3859	4.097	0.03197	0.4457	0.1936	0.2147	0.0002671	0.0002657	1	-0.7567	-0.6514	-2.246	-0.6514	-1.566	-3.02	-2.246	-0.7567	-1.566	351649096584801	35.28016667	-96.9801111
351651097185901	<75	16.5	7	0.0001	2.5	4.80805E-05	0.002097	1.123	1.029	0.2218	0.02046	0.1974	0.06767	0.233	0.0007734	0.0007312	1.1	-0.3727	0.08356	-1.525	0.08354	-1.226	-3.051	-1.525	-0.3727	-1.226	351651097185901	35.28090044	-97.3166975
351715097032501	<130		5.6	0.002511886	5	9.61611E-05	0.00007589	0.1248	0.08229	0.522		0.3103	0.1041		0.0001058	0.00007031	1.5	-3.929	-7.13	-8.675	-7.13	-4.83	-3.593	-8.675	-3.929	-4.83	351715097032501	35.28756996	-97.0572469
351723097274301	<290		8.3	5.01187E-06	15	0.000288483	0.00257	0.1497	0.1234	8.047		0.818	0.989		0.00008579	0.00007594	1.1	0.1676	1.188	-0.3569	1.188	-0.6089	-2.822	-0.3569	0.1676	-0.6089	351723097274301	35.2897872	-97.462257
351726097290901	495		9	0.000001	20	0.000384644	0.002732	0.03493	0.02222	5.829	0.009975	0.3103	0.1988		0.00001917	0.00001385	1.4	0.2135	1.191	-0.3532	1.191	-0.6511	-4.134	-0.3532	0.2135	-0.6511	351726097290901	35.2906202	-97.4861465
351726097290901	535		9	0.000001	20	0.000384644	0.002783	0.03643	0.02222	5.829	0.01458	0.2821	0.202		0.00001989	0.0000138	1.4	0.2373	1.221	-0.3231	1.221	-0.6448	-4.112	-0.3231	0.2373	-0.6448	351726097290901	35.2906202	-97.4861465
351726097290901	585		9	0.000001	20	0.000384644	0.002752	0.03643	0.02263	5.916	0.01509	0.3103	0.2072		0.00001992	0.00001407	1.4	0.233	1.22	-0.3241	1.22	-0.6415	-4.101	-0.3241	0.233	-0.6415	351726097290901	35.2906202	-97.4861465
351726097290901	615		9	0.000001	20	0.000384644	0.002793	0.03468	0.02181	5.872	0.01151	0.3103	0.2176		0.00001887	0.00001351	1.4	0.2159	1.192	-0.3524	1.192	-0.6527	-4.103	-0.3524	0.2159	-0.6527	351726097290901	35.2906202	-97.4861465
351726097290901	655		8.9	1.25893E-06	20	0.000384644	0.002823	0.03593	0.02263	5.916	0.01228	0.3103	0.2259		0.00002016	0.00001426	1.4	0.1588	1.073	-0.4718	1.073	-0.7151	-4.059	-0.4718	0.1588	-0.7151	351726097290901	35.2906202	-97.4861465
351726097290901	<698	17.5	8.9	1.25893E-06	20	0.000384644	0.002746	0.03718	0.02304	5.829	0.01535	0.3103	0.2072		0.00002205	0.00001508	1.5	0.08509	0.8646	-0.7359	0.8646	-0.8964	-4.044	-0.7359	0.08509	-0.8964	351726097290901	35.2906202	-97.4861465
351729097221301	<178.3	17	7.3	5.01187E-05	2.5	4.80805E-05	0.00291	1.497	1.522	0.6525	0.05883	0.3949	0.09578	0.1997	0.000962	0.00102	0.9	0.1618	1.205	-0.3989	1.205	-0.6354	-2.849	-0.3989	0.1618	-0.6354	351729097221301	35.29145504	-97.3705879
351729097221302	95		7.4	3.98107E-05	5	9.61611E-05	0.002823	1.647	1.481	1	0.1279	0.5359	0.1457	0.1498	0.001037	0.0009771	1.1	0.3922	1.664	0.1195	1.664	-0.3571	-2.654	0.1195	0.3922	-0.3571	351729097221302	35.29145504	-97.3705879
351729097221302	135		7.5	3.16228E-05	5	9.61611E-05	0.003633	1.871	1.975	0.87	0.05115	0.5923	0.1353	0.1165	0.001125	0.001256	0.9	0.6309	2.215	0.6706	2.215	-0.04471	-2.677	0.6706	0.6309	-0.04471	351729097221302	35.29145504	-97.3705879
351729097221302	175		7.7	1.99526E-05	5	9.61611E-05	0.002601	1.447	1.605	0.7395	0.07673	0.5359	0.05205	0.09986	0.0009257	0.001075	0.9	0.6062	2.183	0.6383	2.183	-0.05234	-3.145	0.6383	0.6062	-0.05234	351729097221302	35.29145504	-97.3705879
351729097221302	215		7.3	5.01187E-05	5	9.61611E-05	0.002752	1.447	1.522	0.6525	0.07673	0.4513	0.05205	0.1165	0.0009297	0.001022	0.9	0.2366	1.419	-0.1249	1.419	-0.4459	-3.14	-0.1249	0.2366	-0.4459	351729097221302	35.29145504	-97.3705879
351729097221302	250		7.3	5.01187E-05	5	9.61611E-05	0.002671	1.447	1.522	0.609	0.05115	0.4795	0.1249	0.1331	0.0009264	0.001018	0.9	0.2221	1.391	-0.1537	1.391	-0.4602	-2.761	-0.1537	0.2221	-0.4602	351729097221302	35.29145504	-97.3705879
351729097221302	275		7.7	1.99526E-05	5	9.61611E-05	0.002752	1.622	1.605	0.6525	0.05115	0.4795	0.05205	0.1165	0.001028	0.001067	1	0.6749	2.271	0.7268	2.271	-0.03252	-3.106	0.7268	0.6749	-0.03252	351729097221302	35.29145504	-97.3705879
351729097221302	315		7.7	1.99526E-05	5	9.61611E-05	0.002773	1.547	1.522	1.218	0.05115	0.4795	0.1145	0.09986	0.0009746	0.001006	1	0.6552	2.23	0.6853	2.23	-0.05433	-2.783	0.6853	0.6552	-0.05433	351729097221302	35.29145504	-97.3705879
351729097221302	395		8.1	7.94328E-06	5	9.61611E-05	0.002155	1.547	1.481	0.783	0.05115	0.4231	0.1145	0.1165	0.0009916	0.0009954	1	0.948	2.803	1.258	2.803	0.2261	-2.769	1.258	0.948	0.2261	351729097221302	35.29145504	-97.3705879
351729097221302	415		7.7	1.99526E-05	5	9.61611E-05	0.00259	1.497	1.481	0.696	0.05115	0.4231	0.1145	0.09986	0.0009565	0.0009909	1	0.6193	2.159	0.6148	2.159	-0.08891	-2.785	0.6148	0.6193	-0.08891	351729097221302	35.29145504	-97.3705879
351729097221302	435		7.8	1.58489E-05	5	9.61611E-05	0.002914	1.472	1.522	0.7395	0.05115	0.4513	0.1249	0.09986	0.0009246	0.001006	0.9	0.7538	2.45	0.9052	2.45	0.06692	-2.763	0.9052	0.7538	0.06692	351729097221302	35.29145504	-97.3705879
351729097221302	515		7.7	1.99526E-05	5	9.61611E-05	0.002702	1.597	1.563	0.8265	0.05115	0.4513	0.1041	0.1664	0.00101	0.001037	1	0.6596	2.236	0.6914	2.236	-0.05261	-2.81	0.6914	0.6596	-0.05261	351729097221302	35.29145504	-97.3705879
351729097221302	535		7.9	1.25893E-05	5	9.61611E-05	0.002611	1.547	1.563	0.7395	0.05115	0.4513	0.1249	0.09986	0.0009771	0.001037	0.9	0.828	2.587	1.043	2.587	0.1304	-2.743	1.043	0.828	0.1304	351729097221302	35.29145504	-97.3705879
351729097221302	715		7.8	1.58489E-05	5	9.61611E-05	0.002813	0.8234	0.864	5.394	0.05115	2.087	0.1145	0.1165	0.0005111	0.0005662	0.9	0.4836	1.917	0.3726	1.917	-0.1954	-3.029	0.3726	0.4836	-0.1954	351729097221302	35.29145504	-97.3705879
351729097221302	755		7.9	1.25893E-05	5	9.61611E-05	0.002874	1.248	1.193	4.219	0.05115	1.946	0.1562	0.1498	0.0007602	0.0007694	1	0.7596	2.43	0.8854	2.43	0.04138	-2.747	0.8854	0.7596	0.04138	351729097221302	35.29145504	-97.3705879
351729097221302	795		8	0.00001	5	9.61611E-05	0.002632	1.173	1.152	10.4	0.05115	7.334	0.5205	0.09986	0.0006441	0.0006822	0.9	0.7373	2.405	0.8604	2.405	0.03873	-2.327	0.8604	0.7373	0.03873	351729097221302	35.29145504	-97.3705879
351729097221302	585		8	0.00001	20	0.000384644	0.002145	0.2745	0.288	4.045	0.05115	0.141	0.05205	0.233	0.0001886	0.0002062	0.9	0.1461	1.236	-0.3081	1.236	-0.5386	-3.73	-0.3081	0.1461	-0.5386	351729097221302	35.29145504	-97.3705879
351729097221302	655		7.7	1.99526E-05	20	0.000384644	0.002317	0.1996	0.2057	4.698		0.4513	0.1457	0.1331	0.0001349	0.0001449	0.9	-0.2637	0.409	-1.135	0.409	-0.9562	-3.428	-1.135	-0.2637	-0.9562	351729097221302	35.29145504	-97.3705879
351729097221302	<795	17	9	0.000001	74	0.001423184	0.002768	0.1397	0.1193	10.87	0.1151	5.641	0.3227	0.1831	0.00007335	0.00007061	1	0.676	2.192	0.5875	2.192	-0.1632	-3.388	0.5875	0.676	-0.1632	351729097221302	35.29145504	-97.3705879
351751096563301	<95	17.7	7.8	1.58489E-05	0.035	6.73127E-07	0.003102	0.3743	0.1769	11.4	0.04399	0.4823	3.654	0.1781	0.0001752	0.00009009	1.9	-0.05085	0.4703	-1.129	0.4703	-1.154	-1.989	-1.129	-0.05085	-1.154	351751096563301	35.29752778	-96.9423889
351807096545801	<80	17.6	6.9	0.000125893	0.035	6.73127E-07	0.004048	2.403	1.28	3.506	0.02813	3.385	0.3311	0.4627	0.001378	0.0007818	1.8	0.06064	0.7353	-0.8645	0.7353	-1.001	-2.198	-0.8645	0.06064	-1.001	351807096545801	35.3021111	-96.9161944
351817097155201	100		7.8	1.58489E-05	5	9.61611E-05	0.002388	0.2994	0.2057	5.002	0.05115	0.5923	0.1353	0.09986	0.0001997	0.0001433	1.4	0.01696	0.7953	-0.7491	0.7953	-0.8505	-3.299	-0.7491	0.01696	-0.8505	351817097155201	35.3047894	-97.264752
351817097155201	195		7.7	1.99526E-05	5	9.61611E-05	0.002085	0.7236	0.6172	2.001	0.05115	0.1692	0.05205	0.08322	0.0004984	0.0004409	1.1	0.2548	1.362	-0.1826	1.362	-0.5219	-3.339	-0.1826	0.2548	-0.5219	351817097155201	35.3047894	-97.264752
351817097155201	220		7.6	2.51189E-05	5	9.61611E-05	0.001811	0.6238	0.5349	2.131	0.05115	0.141	0.1145	0.09986	0.0004353	0.0003859	1.1	0.03774	0.9285	-0.6159	0.9285	-0.7381	-3.045	-0.6159	0.03774	-0.7381	351817097155201	35.3047894	-97.264752
351817097155201	295		7.3	5.01187E-05	5	9.61611E-05	0.001801	0.7485	0.6172	1.435		0.1692	0.05205	0.08322	0.0005281	0.000449	1.2	-0.1796	0.4757	-1.069	0.4757	-0.9735	-3.31	-1.069	-0.1796	-0.9735	351817097155201	35.3047894	-97.264752
351817097155201	355		7.9	1.25893E-05	5	9.61611E-05	0.002348	1.248	1.07	0.3915	0.05115	0.2539	0.05205	0.1165	0.000827	0.0007405	1.1	0.7171	2.291	0.7471	2.291	-0.05443	-3.16	0.7471	0.7171	-0.05443	351817097155201	35.3047894	-97.264752
351817097155201	395		8	0.00001	5	9.61611E-05	0.002307	1.098	0.9875	0.435	0.05115	0.2257	0.05205	0.08322	0.0007322	0.0006882	1.1	0.7572	2.393	0.8484	2.393	0.006819	-3.202	0.8484	0.7572	0.006819	351817097155201	35.3047894	-97.264752
351817097155201	415		7.6	2.51189E-05	5	9.61611E-05	0.002105	1.223	1.07	0.3915		0.2257	0.1145	0.08322	0.0008206	0.0007457	1.1	0.3704	1.604	0.06006	1.604	-0.3947	-2.819	0.06006	0.3704	-0.3947	351817097155201	35.3047894	-97.264752
351817097155201	495		7.9	1.25893E-05	5	9.61611E-05	0.001821	1.272	1.07	0.3915	0.05115	0.2257	0.05205	0.08322	0.0008629	0.0007532	1.1	0.626	2.098	0.5538	2.098	-0.1566	-3.14	0.5538	0.626	-0.1566	351817097155201	35.3047894	-97.264752
351817097155201	535		7.9	1.25893E-05	5	9.61611E-05	0.0017	1.248	1.07	0.1087		0.2257	0.05205	0.08322	0.000855	0.0007594	1.1	0.593	2.04	0.4954	2.04	-0.182	-3.141	0.4954	0.593	-0.182	351817097155201	35.3047894	-97.264752
351817097155201	555		7.7	1.99526E-05	5	9.61611E-05	0.002095	1.322	1.111	0.1087	0.05115	0.2539	0.05205	0.08322	0.0008891	0.0007761	1.1	0.5014	1.849	0.3046	1.849	-0.2811	-3.132	0.3046	0.5014	-0.2811	351817097155201	35.3047894	-97.264752
351817097155201	655		7.9	1.25893E-05	5	9.61611E-05	0.001744	3.643	2.181	64.38	0.1023	22.85	22.9	0.06657	0.0009095	0.0006412	1.4	0.543	1.839	0.2951	1.839	-0.3323	-0.7591	0.2951	0.543	-0.3323	351817097155201	35.3047894	-97.264752
351817097155201	715		8	0.00001	5	9.61611E-05	0.001825	3.867	2.304	66.12	0.1023	23.92	21.86	0.06657	0.0009818	0.0006892	1.4	0.6921	2.136	0.5914	2.136	-0.1851	-0.7502	0.5914	0.6921	-0.1851	351817097155201	35.3047894	-97.264752
351817097155201	<170	16.5	7.5	3.16228E-05	7	0.000134625	0.002158	1.073	1.07	0.522	0.007673	0.3949	0.04997	0.1531	0.0007329	0.000756	1	0.1134	1.094	-0.5146	1.094	-0.7021	-3.208	-0.5146	0.1134	-0.7021	351817097155201	35.3047894	-97.264752
351817097155201	140		7.1	7.94328E-05	10	0.000192322	0.001892	0.5489	0.4526	5.524		1.439	0.2499	0.09986	0.0003606	0.0003095	1.2	-0.5289	-0.219	-1.763	-0.219	-1.319	-2.806	-1.763	-0.5289	-1.319	351817097155201	35.3047894	-97.264752
351819097071201	<160	18.3	5.7	0.001995262	0.46	8.84682E-06	0.0003253	0.1447	0.1111	0.435	0.01969	0.2082	0.09494	0.2047	0.0001208	0.00009367	1.3	-3.236	-5.719	-7.313	-5.719	-4.153	-3.574	-7.313	-3.236	-4.153	351819097071201	35.30530556	-97.12
351823097215701	<125	17	7.2	6.30957E-05	2.5	4.80805E-05	0.003317	1.771	1.563	0.522	0.02558	0.5641	0.08016	0.2829	0.001115	0.00103	1.1	0.1805	1.183	-0.4214	1.183	-0.6766	-2.875	-0.4214	0.1805	-0.6766	351823097215701	35.30645475	-97.3661436
351823097215701	<125	17.3	7.1	7.94328E-05	5	9.61611E-05	0.003113	1.722	1.563	0.609	0.02558	1.41	0.05205		0.001084	0.001031	1.1	0.04583	0.928	-0.6741	0.9279	-0.795	-3.075	-0.6741	0.04583	-0.795	351823097215701	35.30645475	-97.3661436
351823097215701	<125	17.7	7.1	7.94328E-05	5	9.61611E-05	0.003132	1.996	1.728	0.6525	0.02558	1.41	0.05205		0.001241	0.001127	1.1	0.1101	1.039	-0.5601	1.039	-0.7458	-3.033	-0.5601	0.1101	-0.7458	351823097215701	35.30645475	-97.3661436
351823097215701	<125	16.9	7.1	7.94328E-05	5	9.61611E-05	0.003144	1.771	1.605	0.609	0.02558	1.41	0.05205		0.001112	0.001056	1.1	0.05458	0.9425	-0.6627	0.9425	-0.7918	-3.067	-0.6627	0.05458	-0.7918	351823097215701	35.30645475	-97.3661436
351823097215701	<125	17.7	7	0.0001	5	9.61611E-05	0.003173	1.821	1.605	0.609	0.01279	1.41	0.05205		0.001141	0.001053	1.1	-0.01854	0.7892	-0.8099	0.7892	-0.8669	-3.059	-0.8099	-0.01854	-0.8669	351823097215701	35.30645475	-97.3661436
351823097215701	<125	17.2	7.1	7.94328E-05	5	9.61611E-05	0.003255	1.821	1.605	0.5655	0.01279	1.41	0.05205		0.001138	0.001052	1.1	0.08369	0.9909	-0.612	0.9909	-0.7706	-3.059	-0.612	0.08369	-0.7706	351823097215701	35.30645475	-97.3661436
351839097254301	<165	17.7	7.2	6.30957E-05	5	9.61611E-05	0.00417	1.871	2.469	4.132	0.1023	4.795	0.1041		0.001054	0.001489	0.7	0.2526	1.516	-0.08325	1.516	-0.4114	-2.838	-0.08325	0.2526	-0.4114	351839097254301	35.3106	-97.4285694
351839097254301	<165	18.1	7	0.0001	5	9.61611E-05	0.004179	1.796	2.345	3.871	0.1023	4.795	0.1041		0.001017	0.00142	0.7	0.04651	1.101	-0.4949	1.101	-0.6174	-2.848	-0.4949	0.04651	-0.6174	351839097254301	35.3106	-97.4285694
351839097254301	<165	18.4	7.2	6.30957E-05	5	9.61611E-05	0.00427	2.071	2.674	4.263	0.1023	5.077	0.1041		0.001151	0.001594	0.7	0.309	1.624	0.03058	1.624	-0.3548	-2.813	0.03058	0.309	-0.3548	351839097254301	35.3106	-97.4285694
351839097254301	<165	18	7.1	7.94328E-05	10	0.000192322	0.003986	1.921	2.469	3.784	0.07673	7.898	0.1041		0.001062	0.001471	0.7	0.1398	1.284	-0.3131	1.284	-0.5288	-2.84	-0.3131	0.1398	-0.5288	351839097254301	35.3106	-97.4285694
351839097254301	<165	18.7	7.2	6.30957E-05	10	0.000192322	0.004411	1.871	2.386	3.741	0.1023	4.513	0.1041		0.001053	0.001437	0.7	0.2917	1.586	-0.005998	1.586	-0.3745	-2.837	-0.005998	0.2917	-0.3745	351839097254301	35.3106	-97.4285694
351853097284701	582	13	7.8	1.58489E-05	44.2	0.000850064	0.002683	0.5215	0.8146	1.87	0.04885	0.2124	0.07496	0.223	0.0003535	0.0005744	0.6	0.1423	1.326	-0.3086	1.326	-0.5206	-3.312	-0.3086	0.1423	-0.5206	351853097284701	35.3147864	-97.4800356
351853097284701	653	12.4	8.2	6.30957E-06	44.4	0.00085391	0.002511	0.3718	0.5431	2.558	0.04041	0.2034	0.07485	0.2147	0.0002531	0.0003863	0.7	0.358	1.727	0.08713	1.727	-0.3398	-3.437	0.08713	0.358	-0.3398	351853097284701	35.3147864	-97.4800356
351853097284701	686	13.4	8.1	7.94328E-06	44.8	0.000861603	0.002539	0.3718	0.5472	2.614	0.04118	0.2084	0.07766	0.2164	0.0002533	0.0003889	0.7	0.279	1.578	-0.0541	1.578	-0.4033	-3.424	-0.0541	0.279	-0.4033	351853097284701	35.3147864	-97.4800356
351853097284701	710	10.8	8.1	7.94328E-06	45.5	0.000875066	0.002585	0.3643	0.5431	2.671	0.04067	0.2031	0.07537	0.2147	0.0002485	0.0003863	0.6	0.2406	1.49	-0.1626	1.49	-0.47	-3.439	-0.1626	0.2406	-0.47	351853097284701	35.3147864	-97.4800356
351853097284701	<811	18.7	8.7	1.99526E-06	66	0.001269326	0.003943	0.2545	0.3403	4.437	0.02941	0.1726	0.1197	0.1981	0.0001469	0.0002171	0.7	0.8885	2.814	1.222	2.814	0.2568	-3.485	1.222	0.8885	0.2568	351853097284701	35.3147864	-97.4800356
351853097284701	<811	18.5	8.7	1.99526E-06	66.2	0.001273172	0.003141	0.262	0.3518	4.35	0.03095	0.1754	0.1176	0.1947	0.000159	0.0002325	0.7	0.8232	2.677	1.084	2.677	0.1842	-3.452	1.084	0.8232	0.1842	351853097284701	35.3147864	-97.4800356
351858097124801	<140		6.3	0.000501187	5	9.61611E-05	0.0007083	0.5489	0.4114	0.2175		0.4513	0.1041		0.0004205	0.0003208	1.3	-1.672	-2.556	-4.1	-2.556	-2.513	-3.067	-4.1	-1.672	-2.513	351858097124801	35.31617865	-97.2136398
351902097251201	<260		7.3	5.01187E-05	5	9.61611E-05	0.004807	1.771	2.304	2.958		0.5641	0.1041		0.001014	0.001408	0.7	0.5047	2.057	0.5128	2.057	-0.0763	-2.851	0.5128	0.5047	-0.0763	351902097251201	35.3172871	-97.4203118
351904097294201	<430	17.7	7.8	1.58489E-05	20	0.000384644	0.002786	0.499	0.6172	4.219	0.05115	0.2821	0.1041		0.0003292	0.000425	0.8	0.1934	1.358	-0.2406	1.358	-0.5095	-3.212	-0.2406	0.1934	-0.5095	351904097294201	35.3178417	-97.4953138
351904097294201	<430	17.7	7.7	1.99526E-05	20	0.000384644	0.002786	0.4741	0.576	4.437	0.05115	0.2821	0.2082		0.0003098	0.0003931	0.8	0.06766	1.099	-0.4996	1.099	-0.6428	-2.936	-0.4996	0.06766	-0.6428	351904097294201	35.3178417	-97.4953138
351904097294201	<430	17.1	7.8	1.58489E-05	20	0.000384644	0.002849	0.4741	0.6172	4.176	0.07673	0.141	0.1041		0.000313	0.0004253	0.7	0.1727	1.336	-0.268	1.336	-0.5156	-3.231	-0.268	0.1727	-0.5156	351904097294201	35.3178417	-97.4953138
351904097294201	<430	18	7.8	1.58489E-05	20	0.000384644	0.002867	0.4741	0.576	4.306	0.05115	0.2821	0.2082		0.0003084	0.000392	0.8	0.1817	1.33	-0.2666	1.33	-0.5242	-2.938	-0.2666	0.1817	-0.5242	351904097294201	35.3178417	-97.4953138
351912097193601	<158	17.5	7.3	5.01187E-05	2.5	4.80805E-05	0.003234	1.796	1.481	0.435	0.02558	0.3385	0.1978	0.2663	0.001126	0.0009723	1.2	0.2812	1.358	-0.2424	1.358	-0.5989	-2.476	-0.2424	0.2812	-0.5989	351912097193601	35.32006604	-97.326976
351914097320201	<782	19.7	8.6	2.51189E-06	14.3	0.000275021	0.003768	0.2645	0.3641	8.308	0.03351	3.526	0.1832	0.1964	0.000147	0.0002229	0.7	0.7784	2.611	1.027	2.611	0.1703	-3.334	1.027	0.7784	0.1703	351914097320201	35.32055556	-97.5338889
351926097293001	<795	19.5	8.9	1.25893E-06	72	0.001384719	0.002996	0.3493	0.5349	4.35	0.03325	0.2059	0.1353	0.2164	0.0002017	0.0003428	0.6	1.103	3.307	1.722	3.307	0.5413	-3.301	1.722	1.103	0.5413	351926097293001	35.32395269	-97.4947584
351937096512201	<100	17.7	7.2	6.30957E-05	0.24	4.61573E-06	0.003295	1.03	0.6583	3.167	0.03709	0.5387	0.2478	0.2996	0.0006548	0.0004383	1.5	-0.03638	0.6136	-0.9854	0.6136	-1.025	-2.564	-0.9854	-0.03638	-1.025	351937096512201	35.32694444	-96.8560278
351959097180401	-999		7.6	2.51189E-05	5	9.61611E-05	0.002337	1.497	0.9875	0.2175		0.141	0.1041		0.0009922	0.0006814	1.5	0.4964	1.735	0.1905	1.735	-0.3903	-2.787	0.1905	0.4964	-0.3903	351959097180401	35.3331216	-97.30142
351959097180401	-999		7.1	7.94328E-05	5	9.61611E-05	0.00343	1.447	0.4114	0.2175		0.141	0.1041		0.0009431	0.000281	3.4	0.1467	0.6727	-0.8717	0.6727	-1.103	-2.788	-0.8717	0.1467	-1.103	351959097180401	35.3331216	-97.30142
352002097000301	<160	18.2	6.7	0.000199526	0.85	1.63474E-05	0.003274	2.048	1.605	3.123	0.03351	2.99	0.787	0.258	0.001167	0.0009724	1.2	-0.2921	0.2004	-1.395	0.2004	-1.179	-1.89	-1.395	-0.2921	-1.179	352002097000301	35.33388889	-97.0008889
352043097282001	<818	18.5	9	0.000001	59	0.0011347	0.002988	0.3493	0.4937	4.785	0.02813	0.2341	0.1031	0.1997	0.0001972	0.0003127	0.6	1.168	3.402	1.809	3.402	0.5644	-3.427	1.809	1.168	0.5644	352043097282001	35.34534137	-97.4725359
352123097282301	<860	18.5	8.8	1.58489E-06	44	0.000846217	0.002419	0.2745	0.3909	3.654	0.03581	0.1636	0.09057	0.2164	0.000173	0.0002664	0.6	0.8429	2.739	1.146	2.739	0.2264	-3.521	1.146	0.8429	0.2264	352123097282301	35.3564522	-97.4733694
352145097345901	<776	19.5	8.9	1.25893E-06	15	0.000288483	0.002864	0.04242	0.03538	6.09	0.01023	0.1777	0.1457	0.1831	0.00002482	0.00002294	1.1	0.1822	1.202	-0.3835	1.202	-0.6435	-4.149	-0.3835	0.1822	-0.6435	352145097345901	35.3625618	-97.5833722
352222097121701	<130		5.4	0.003981072	5	9.61611E-05	0.004543	0.02495	0.04114	0.2175		0.141	0.1041		0.00001665	0.00002892	0.6	-3.17	-5.194	-6.738	-5.194	-3.653	-4.451	-6.738	-3.17	-3.653	352222097121701	35.37284407	-97.2050292
352226097073901	<160	17.8	5.3	0.005011872	0.19	3.65412E-06	0.0004169	0.3743	0.2831	0.8395	0.022	0.6741	0.204	0.243	0.0002889	0.0002222	1.3	-3.164	-5.581	-7.18	-5.581	-4.091	-2.91	-7.18	-3.164	-4.091	352226097073901	35.37405556	-97.1276389
352232097035501	<60	19	6	0.001	0.26	5.00038E-06	0.001016	0.3992	0.3534	1.557	0.02865	0.488	0.3404	0.1964	0.0002887	0.0002622	1.1	-2.066	-3.305	-4.894	-3.305	-2.905	-2.71	-4.894	-2.066	-2.905	352232097035501	35.37555556	-97.0653611
352232097190201	<220	15.8	6.8	0.000158489	5	9.61611E-05	0.00168	0.8483	0.7406	0.261	0.01279	0.141	0.05205		0.0006103	0.0005467	1.1	-0.7757	-0.7503	-2.364	-0.7503	-1.661	-3.237	-2.364	-0.7757	-1.661	352232097190201	35.37509167	-97.3172083
352232097190201	<220	16.2	6.8	0.000158489	5	9.61611E-05	0.00168	0.8982	0.7406	0.261	0.01279	0.141	0.05205		0.0006447	0.0005454	1.2	-0.7466	-0.7145	-2.325	-0.7145	-1.652	-3.216	-2.325	-0.7466	-1.652	352232097190201	35.37509167	-97.3172083
352232097190201	<220	17.1	6.7	0.000199526	5	9.61611E-05	0.001679	0.998	0.8229	0.261	0.01279	0.141	0.05205		0.0007103	0.0006012	1.2	-0.7927	-0.8008	-2.404	-0.8008	-1.687	-3.185	-2.404	-0.7927	-1.687	352232097190201	35.37509167	-97.3172083
352232097190201	<220	14.8	6.8	0.000158489	5	9.61611E-05	0.001722	0.8982	0.7817	0.261	0.01279	0.141	0.05205		0.0006428	0.0005742	1.1	-0.7579	-0.7222	-2.343	-0.7222	-1.657	-3.217	-2.343	-0.7579	-1.657	352232097190201	35.37509167	-97.3172083
352232097190201	<220	16.8	6.7	0.000199526	5	9.61611E-05	0.001771	0.8982	0.7406	0.2175	0.01279	0.141	0.05205		0.0006423	0.0005438	1.2	-0.8163	-0.8498	-2.456	-0.8498	-1.714	-3.219	-2.456	-0.8163	-1.714	352232097190201	35.37509167	-97.3172083
352236096551001	<285	18.5	8.9	1.25893E-06	2.5	4.80805E-05	0.003538	0.04491	0.02345	10.87	0.02046	0.9026	1.457	0.1614	0.00002169	0.00001283	1.7	0.185	1.008	-0.5855	1.008	-0.847	-3.26	-0.5855	0.185	-0.847	352236096551001	35.37673634	-96.9197452
352303097033401	<220	17	6.8	0.000158489	2	3.84644E-05	0.00521	1.41	0.7488	5.133	0.04143	0.6064	0.3654	0.3728	0.0008171	0.0004615	1.8	-0.1581	0.292	-1.312	0.292	-1.229	-2.334	-1.312	-0.1581	-1.229	352303097033401	35.3840833	-97.0594444
352314097185101	<155		7.1	7.94328E-05	5	9.61611E-05	0.001983	0.02495	0.04114	5.263		0.3385	0.1041		0.00001751	0.00002985	0.6	-1.812	-2.488	-4.032	-2.488	-2.304	-4.439	-4.032	-1.812	-2.304	352314097185101	35.3872868	-97.3144766
352326097044801	<97	17	6.9	0.000125893	2.5	4.80805E-05	0.002137	1.248	0.9052	2.131	0.02558	0.9872	0.3748	0.233	0.0008089	0.0006107	1.3	-0.4419	-0.1496	-1.754	-0.1496	-1.387	-2.303	-1.754	-0.4419	-1.387	352326097044801	35.39062296	-97.0803043
352326097044801	<97	16.7	6.8	0.000158489	5	9.61611E-05	0.001638	1.048	0.7817	1.696	0.02558	0.8462	0.2082		0.0007154	0.000551	1.3	-0.7101	-0.6791	-2.286	-0.6791	-1.65	-2.591	-2.286	-0.7101	-1.65	352326097044801	35.39062296	-97.0803043
352326097044801	<97	16.9	6.8	0.000158489	5	9.61611E-05	0.002086	1.048	0.7817	1.783	0.02558	0.8462	0.2082		0.0007026	0.0005432	1.3	-0.6111	-0.4783	-2.083	-0.4783	-1.547	-2.602	-2.083	-0.6111	-1.547	352326097044801	35.39062296	-97.0803043
352326097044801	<97	17.4	6.8	0.000158489	5	9.61611E-05	0.002106	1.073	0.7817	1.696	0.02558	0.8462	0.2082		0.0007186	0.0005427	1.3	-0.5901	-0.4433	-2.045	-0.4433	-1.53	-2.594	-2.045	-0.5901	-1.53	352326097044801	35.39062296	-97.0803043
352326097044801	<97	17.4	6.8	0.000158489	5	9.61611E-05	0.002126	1.073	0.7817	1.783	0.02558	0.8462	0.2082		0.0007175	0.000542	1.3	-0.5868	-0.4365	-2.038	-0.4365	-1.526	-2.595	-2.038	-0.5868	-1.526	352326097044801	35.39062296	-97.0803043
352326097044801	<97	17.4	6.8	0.000158489	5	9.61611E-05	0.002136	1.223	0.9052	1.914	0.02558	0.8462	0.2082		0.0008094	0.0006216	1.3	-0.5344	-0.3246	-1.926	-0.3246	-1.467	-2.555	-1.926	-0.5344	-1.467	352326097044801	35.39062296	-97.0803043
352345097331901	<783		7.3	5.01187E-05	5	9.61611E-05	0.002408	0.8483	1.029	2.044		0.5923	0.1041		0.0005615	0.0007091	0.8	-0.03375	0.9392	-0.6052	0.9392	-0.6558	-3.016	-0.6052	-0.03375	-0.6558	352345097331901	35.39589465	-97.5555942
352351096544001	<80.0	18.5	9.1	7.94328E-07	2.5	4.80805E-05	0.004066	0.03244	0.01769	9.569	0.02046	1.213	0.4164	0.1515	0.00001536	0.000009864	1.6	0.2806	1.234	-0.3586	1.234	-0.7157	-3.939	-0.3586	0.2806	-0.7157	352351096544001	35.39756934	-96.9114119
352357097031901	<242		6.9	0.000125893	5	9.61611E-05	0.003157	6.886	0.9052	1.566		0.4795	0.1041		0.003892	0.0005414	7.2	0.4896	1.028	-0.5167	1.028	-1.091	-2.37	-0.5167	0.4896	-1.091	352357097031901	35.39923418	-97.0555817
352407096462701	<41	17.1	6.8	0.000158489	0.035	6.73127E-07	0.006593	2.595	2.045	3.154	0.04118	0.5331	0.5382	0.4028	0.001388	0.001177	1.2	0.1644	1.114	-0.4893	1.114	-0.7286	-2.009	-0.4893	0.1644	-0.7286	352407096462701	35.40194444	-96.7741667
352412097040301	<170	16.4	8.2	6.30957E-06	0.035	6.73127E-07	0.003135	0.104	0.08064	6.699	0.02532	1.199	0.481	0.1428	0.00006355	0.00005244	1.2	-0.09273	0.5838	-1.025	0.5838	-1.006	-3.239	-1.025	-0.09273	-1.006	352412097040301	35.40394444	-97.0676389
352417097015301	<110	17.3	8.3	5.01187E-06	8.6	0.000165397	0.002126	0.1265	0.1193	3.749	0.03018	0.5049	0.1385	0.2763	0.00008675	0.00008561	1	-0.005417	0.8416	-0.7605	0.8416	-0.8301	-3.613	-0.7605	-0.005417	-0.8301	352417097015301	35.4049472	-97.0315167
352433097262401	<104	17	7	0.0001	2.5	4.80805E-05	0.003236	2.745	2.345	2.262	0.0179	4.795	0.07183	0.2996	0.001584	0.001439	1.1	0.1092	1.033	-0.5713	1.033	-0.7551	-2.837	-0.5713	0.1092	-0.7551	352433097262401	35.40922919	-97.4403137
352449097054601	<110	18.9	6.1	0.000794328	0.86	1.65397E-05	0.00126	0.7236	0.576	0.8613	0.04425	0.9618	0.1499	0.263	0.000519	0.0004242	1.2	-1.623	-2.464	-4.055	-2.464	-2.509	-2.841	-4.055	-1.623	-2.509	352449097054601	35.41366667	-97.0960278
352508096561401	-999		8.6	2.51189E-06	5	9.61611E-05	0.004342	0.1497	0.1234	14.44		1.862	1.28		0.00007138	0.00006628	1.1	0.5908	2.055	0.5104	2.055	-0.1649	-2.837	0.5104	0.5908	-0.1649	352508096561401	35.41895746	-96.9375237
352510097011201	<142	18	7.3	5.01187E-05	11.2	0.000215401	0.003111	0.7111	0.5966	4.48	0.03836	1.145	0.3508	0.2546	0.0004466	0.0003934	1.1	-0.1232	0.5611	-1.036	0.5611	-0.9885	-2.57	-1.036	-0.1232	-0.9885	352510097011201	35.41966667	-97.0200556
352515097370801	<843	20	9.1	7.94328E-07	34	0.000653895	0.003006	0.0499	0.03209	6.525	0.01279	0.1664	0.2707	0.1831	0.00002647	0.00001952	1.4	0.4163	1.575	-0.006643	1.575	-0.5014	-3.86	-0.006643	0.4163	-0.5014	352515097370801	35.42089307	-97.619207
352518097270601	<750	18	7.6	2.51189E-05	0.25	4.80805E-06	0.002176	1.198	1.275	0.696	0.06138	1.128	0.06767	0.2496	0.0007958	0.0008802	0.9	0.2702	1.447	-0.1501	1.447	-0.4962	-3.06	-0.1501	0.2702	-0.4962	352518097270601	35.42172876	-97.4519808
352519097222501	<879	18	7.8	1.58489E-05	24	0.000461573	0.002298	0.9731	0.7406	1.957	0.02813	0.5077	0.1145	0.1997	0.0006527	0.0005165	1.3	0.4104	1.582	-0.01513	1.582	-0.5014	-2.889	-0.01513	0.4104	-0.5014	352519097222501	35.42200749	-97.3739231
352520097280601	<185	17	7.6	2.51189E-05	1.2	2.30787E-05	0.002157	1.123	1.07	0.522	0.03581	0.1608	0.06767	0.2496	0.0007653	0.0007545	1	0.2384	1.327	-0.2774	1.327	-0.5905	-3.06	-0.2774	0.2384	-0.5905	352520097280601	35.4222841	-97.468648
352527097144201	<120	16.7	5	0.01	0.4	7.69288E-06	0.0002035	0.1435	0.07241	0.2684	0.02123	0.1447	0.08453	0.2946	0.0001228	0.00006241	2	-4.154	-7.747	-9.354	-7.747	-5.274	-3.606	-9.354	-4.154	-5.274	352527097144201	35.4242222	-97.2449167
352531097262101	<150	17.5	6.8	0.000158489	2.5	4.80805E-05	0.002729	9.406	8.805	21.62	0.04092	51.34	0.1249	0.2996	0.003607	0.004024	0.9	0.1373	1.182	-0.419	1.182	-0.6316	-2.493	-0.419	0.1373	-0.6316	352531097262101	35.42533994	-97.4394805
352535097303301	515	17	6.9	0.000125893	2.5	4.80805E-05	0.003157	8.832	6.624	17.23	0.05115	42.59	0.1457	0.3828	0.003559	0.003132	1.1	0.2951	1.391	-0.2132	1.391	-0.583	-2.396	-0.2132	0.2951	-0.583	352535097303301	35.42645014	-97.5094824
352536097072501	<116		5.2	0.006309573	5	9.61611E-05	0.00007589	0.3743	0.3703	0.783		0.959	0.2394		0.0002887	0.0002901	1	-3.902	-6.897	-8.441	-6.897	-4.624	-2.856	-8.441	-3.902	-4.624	352536097072501	35.4267327	-97.1239169
352543096585601	<140	17.5	7.4	3.98107E-05	2.5	4.80805E-05	0.002116	1.198	1.07	1.305	0.02813	0.9872	0.1249	0.3329	0.0007976	0.0007394	1.1	0.05363	0.9338	-0.6668	0.9338	-0.7957	-2.786	-0.6668	0.05363	-0.7957	352543096585601	35.4286789	-96.9825249
352550097055401	<400	17	7	0.0001	11	0.000211554	0.00175	0.8234	0.6994	2.175	0.03325	1.326	0.1562	0.2663	0.0005624	0.0004941	1.1	-0.5815	-0.3628	-1.967	-0.3628	-1.46	-2.81	-1.967	-0.5815	-1.46	352550097055401	35.4306218	-97.0986386
352550097055401	<400	17.5	7	0.0001	40	0.000769288	0.001953	0.6238	0.5349	4.219	0.03069	1.946	0.2707	0.1997	0.0004112	0.0003669	1.1	-0.6645	-0.519	-2.12	-0.519	-1.53	-2.705	-2.12	-0.6645	-1.53	352550097055401	35.4306218	-97.0986386
352553097021101	<167	17.7	8.4	3.98107E-06	4.7	9.03914E-05	0.00357	0.123	0.09669	7.569	0.03044	0.8123	0.6892	0.1516	0.00007061	0.00006	1.2	0.2211	1.232	-0.3669	1.232	-0.6636	-3.05	-0.3669	0.2211	-0.6636	352553097021101	35.43151944	-97.0366361
352557097024101	<180	16.6	8.5	3.16228E-06	15.6	0.000300023	0.00401	0.07809	0.07529	8.004	0.02941	1.168	0.4622	0.1864	0.00004431	0.00004661	1	0.15	1.176	-0.4315	1.176	-0.6557	-3.426	-0.4315	0.15	-0.6557	352557097024101	35.43260278	-97.0447444
352601097093701	-999		6.1	0.000794328	5	9.61611E-05	0.0003947	1.622	0.6172	1.392		1.495	0.4268		0.001107	0.0004331	2.6	-1.718	-2.939	-4.483	-2.939	-2.849	-2.12	-4.483	-1.718	-2.849	352601097093701	35.4336765	-97.1605845
352603097024901	<163	17.1	8.4	3.98107E-06	31.4	0.000603891	0.003764	0.07086	0.06912	6.786	0.02558	0.4541	0.253	0.1981	0.00004271	0.00004486	1	0.02088	0.92	-0.6836	0.92	-0.7793	-3.689	-0.6836	0.02088	-0.7793	352603097024901	35.43427778	-97.0470556
352604097370901	<854		8.6	2.51189E-06	32.8	0.000630817	0.003329	0.1831	0.09957	6.916	0.01458	0.4541	0.6652	0.1748	0.0001011	0.00006058	1.7	0.6422	1.967	0.4226	1.967	-0.304	-2.917	0.4226	0.6422	-0.304	352604097370901	35.4345038	-97.6194849
352605097375701	<1020	20.5	8.8	1.58489E-06	45	0.00086545	0.003167	0.1148	0.06994	7.395	0.01279	0.3667	0.7704	0.1997	0.00006216	0.00004205	1.5	0.5377	1.784	0.2054	1.784	-0.4113	-3.054	0.2054	0.5377	-0.4113	352605097375701	35.43450367	-97.6275407
352609097033801	<180	17.8	8	0.00001	24.4	0.000469266	0.003183	0.2233	0.2308	4.915	0.05039	0.3554	0.1988	0.2097	0.0001442	0.0001569	0.9	0.09553	1.089	-0.5093	1.089	-0.6805	-3.265	-0.5093	0.09553	-0.6805	352609097033801	35.43619444	-97.0603056
352622097103401	<100	17.5	6.2	0.000630957	2.5	4.80805E-05	0.0005696	0.7236	0.4937	0.696	0.04092	0.818	0.3227	0.2663	0.0005278	0.0003684	1.4	-1.879	-3.054	-4.655	-3.054	-2.851	-2.489	-4.655	-1.879	-2.851	352622097103401	35.4395095	-97.1764183
352625097022401	<172	17	5.6	0.002511886	0.06	1.15393E-06	0.0002747	0.2894	0.174	0.3336	0.02583	0.33	0.1832	0.223	0.0002333	0.0001421	1.6	-3.146	-5.651	-7.255	-5.651	-4.184	-3.023	-7.255	-3.146	-4.184	352625097022401	35.4402333	-97.0402056
352631097313101	<196	17	7.2	6.30957E-05	2.5	4.80805E-05	0.003215	2.745	1.769	2.392	0.03581	3.949	0.177	0.4161	0.001602	0.001095	1.5	0.3127	1.317	-0.2876	1.317	-0.675	-2.424	-0.2876	0.3127	-0.675	352631097313101	35.44200508	-97.5255941
352632097024401	<155	18.9	5.5	0.003162278	0.26	5.00038E-06	0.0002743	0.2769	0.1819	0.4076	0.02379	0.4457	0.1926	0.258	0.0002217	0.0001476	1.5	-3.241	-5.791	-7.381	-5.791	-4.217	-3.027	-7.381	-3.241	-4.217	352632097024401	35.4423361	-97.0456417
352633096543801	<80		7.3	5.01187E-05	5	9.61611E-05	0.003066	1.747	0.7406	1.957		0.7052	0.1041		0.001107	0.0004922	2.2	0.3594	1.272	-0.2723	1.272	-0.716	-2.753	-0.2723	0.3594	-0.716	352633096543801	35.4425684	-96.9108567
352639097083401	<160	17	6.7	0.000199526	2.5	4.80805E-05	0.001323	0.7735	0.576	0.3828	0.03069	0.2398	0.05726	0.2496	0.0005695	0.0004337	1.3	-0.9893	-1.24	-2.845	-1.24	-1.93	-3.213	-2.845	-0.9893	-1.93	352639097083401	35.44423207	-97.1430843
352639097083401	<160	17.9	6.7	0.000199526	5	9.61611E-05	0.001078	0.7236	0.5349	0.3915	0.02558	0.2821	0.1041		0.0005373	0.0004056	1.3	-1.089	-1.438	-3.036	-1.438	-2.023	-2.973	-3.036	-1.089	-2.023	352639097083401	35.44423207	-97.1430843
352639097083401	<160	16.8	6.6	0.000251189	5	9.61611E-05	0.001099	0.7236	0.576	0.3915	0.05115	0.2821	0.1041		0.0005358	0.0004356	1.2	-1.198	-1.631	-3.237	-1.631	-2.113	-2.975	-3.237	-1.198	-2.113	352639097083401	35.44423207	-97.1430843
352639097083401	<160	18.2	6.6	0.000251189	5	9.61611E-05	0.001118	0.7984	0.576	0.3915	0.02558	0.2821	0.1041		0.0005882	0.0004336	1.4	-1.13	-1.529	-3.124	-1.529	-2.07	-2.941	-3.124	-1.13	-2.07	352639097083401	35.44423207	-97.1430843
352639097083401	<160	16.2	6.6	0.000251189	5	9.61611E-05	0.00115	0.7485	0.576	0.3915	0.05115	0.2821	0.1041		0.0005524	0.0004344	1.3	-1.174	-1.601	-3.212	-1.601	-2.111	-2.963	-3.212	-1.174	-2.111	352639097083401	35.44423207	-97.1430843
352639097083401	<160	17.9	6.5	0.000316228	5	9.61611E-05	0.001169	0.7485	0.576	0.348	0.02558	0.2821	0.1041		0.0005519	0.0004341	1.3	-1.242	-1.727	-3.324	-1.727	-2.158	-2.965	-3.324	-1.242	-2.158	352639097083401	35.44423207	-97.1430843
352654097022301	<160	18.2	8	0.00001	1.3	2.50019E-05	0.002125	0.484	0.4485	2.579	0.05192	0.4541	0.2509	0.2147	0.0003271	0.0003157	1	0.2831	1.415	-0.1806	1.415	-0.5399	-2.812	-0.1806	0.2831	-0.5399	352654097022301	35.4485722	-97.0397778
352656097031601	<320	17.9	8.4	3.98107E-06	4.5	8.6545E-05	0.003437	0.1103	0.08764	6.786	0.02813	0.7644	0.3821	0.1664	0.00006612	0.00005649	1.2	0.1819	1.157	-0.4401	1.157	-0.6978	-3.324	-0.4401	0.1819	-0.6978	352656097031601	35.44896944	-97.0546389
352705097175401	<220	17	6.7	0.000199526	2.5	4.80805E-05	0.001221	0.7236	0.4937	0.2958	0.0179	0.2257	0.03435	0.2663	0.0005418	0.0003772	1.4	-1.044	-1.389	-2.993	-1.389	-2.024	-3.447	-2.993	-1.044	-2.024	352705097175401	35.45172999	-97.2930879
352710097034601	<220	16.4	8.2	6.30957E-06	0.24	4.61573E-06	0.002809	0.4341	0.3571	3.241	0.04936	0.1317	0.1124	0.1714	0.0002879	0.0002489	1.2	0.5195	1.828	0.2194	1.828	-0.374	-3.213	0.2194	0.5195	-0.374	352710097034601	35.45277778	-97.0627778
352710097332401	<785		7.4	3.98107E-05	5	9.61611E-05	0.002803	1.547	1.728	0.348		3.046	0.8745		0.0008961	0.001064	0.8	0.3229	1.626	0.08146	1.626	-0.3259	-1.947	0.08146	0.3229	-0.3259	352710097332401	35.45283765	-97.5569838
352714097034101	<135	17.5	8.5	3.16228E-06	0.03	5.76966E-07	0.003224	0.06437	0.05719	6.742	0.02455	0.8716	0.4216	0.1475	0.00003842	0.00003683	1	0.01077	0.8626	-0.738	0.8626	-0.8241	-3.512	-0.738	0.01077	-0.8241	352714097034101	35.45388889	-97.0613889
352717097043801	<140	17.1	8.3	5.01187E-06	3.2	6.15431E-05	0.002727	0.2769	0.2181	4.437	0.04271	0.7334	0.2269	0.1864	0.0001787	0.0001488	1.2	0.4073	1.592	-0.01139	1.592	-0.4935	-3.111	-0.01139	0.4073	-0.4935	352717097043801	35.4547111	-97.077375
352726097031601	<125	17.8	6.5	0.000316228	1	1.92322E-05	0.001281	0.7036	0.4855	1.327	0.01662	0.6713	0.2478	0.2663	0.0005001	0.0003547	1.4	-1.249	-1.786	-3.384	-1.786	-2.211	-2.634	-3.384	-1.249	-2.211	352726097031601	35.45721944	-97.0545083
352732097041501	<102	18.9	5.9	0.001258925	1.2	2.30787E-05	0.0007316	0.3817	0.2646	0.5046	0.01739	0.2716	0.1156	0.3179	0.0002983	0.0002101	1.4	-2.29	-3.864	-5.454	-3.864	-3.241	-3.14	-5.454	-2.29	-3.241	352732097041501	35.45885556	-97.0708139
352738097191001	<180	17	6.1	0.000794328	2.5	4.80805E-05	0.000875	0.8982	0.6994	0.6525	0.02302	0.818	0.229	0.3662	0.000644	0.0005139	1.3	-1.716	-2.673	-4.277	-2.673	-2.636	-2.573	-4.277	-1.716	-2.636	352738097191001	35.46061834	-97.3197555
352740097275301	<191	17.5	7.5	3.16228E-05	8	0.000153858	0.002136	1.098	0.9463	0.7395	0.03325	0.3103	0.076	0.2996	0.0007498	0.0006684	1.1	0.1338	1.077	-0.5234	1.077	-0.7325	-3.014	-0.5234	0.1338	-0.7325	352740097275301	35.46117214	-97.4650373
352747097051401	<180	17.1	6.6	0.000251189	0.9	1.7309E-05	0.001495	0.4915	0.3748	1.17	0.0312	0.2462	0.06361	0.2729	0.0003637	0.0002839	1.3	-1.227	-1.704	-3.308	-1.704	-2.156	-3.339	-3.308	-1.227	-2.156	352747097051401	35.46313889	-97.0873444
352749097192301	<697	17	7.6	2.51189E-05	6	0.000115393	0.001913	1.098	0.864	0.261	0.03581	0.2736	0.05413	0.1831	0.0007646	0.0006207	1.2	0.1884	1.143	-0.4616	1.143	-0.7248	-3.145	-0.4616	0.1884	-0.7248	352749097192301	35.46367378	-97.3233667
352749097192301	<697	17	7.6	2.51189E-05	8	0.000153858	0.001913	1.098	0.9052	0.2523	0.03581	0.2708	0.06142	0.1831	0.0007628	0.000649	1.2	0.1871	1.16	-0.444	1.16	-0.7058	-3.093	-0.444	0.1871	-0.7058	352749097192301	35.46367378	-97.3233667
352750097263601	<97.5	17	7.2	6.30957E-05	2.5	4.80805E-05	0.00405	2.37	1.605	2.131	0.03581	0.6487	0.177	0.3828	0.001409	0.001008	1.4	0.362	1.435	-0.1697	1.435	-0.6064	-2.459	-0.1697	0.362	-0.6064	352750097263601	35.4639501	-97.4436479
352755097141801	<240	16.6	6.3	0.000501187	1	1.92322E-05	0.001801	0.9581	0.7036	0.6307	0.03402	0.5359	0.09848	0.2347	0.0006725	0.0005086	1.3	-1.192	-1.651	-3.258	-1.651	-2.141	-2.928	-3.258	-1.192	-2.141	352755097141801	35.46527778	-97.2383889
352755097332002	<222.5	18	7.2	6.30957E-05	2.5	4.80805E-05	0.004262	3.244	2.469	9.569	0.08696	7.334	2.707	0.3495	0.001501	0.001256	1.2	0.4053	1.596	-0.0009724	1.596	-0.4823	-1.32	-0.0009724	0.4053	-0.4823	352755097332002	35.46533735	-97.5558729
352757097200801	<107	17.5	7	0.0001	2.5	4.80805E-05	0.001749	1.098	0.8229	0.609	0.0179	0.4231	0.1145	0.2663	0.0007637	0.0005896	1.3	-0.4409	-0.1346	-1.735	-0.1346	-1.37	-2.821	-1.735	-0.4409	-1.37	352757097200801	35.4658958	-97.3358671
352759097220201	<80.0	17.8	6.5	0.000316228	5	9.61611E-05	0.001932	1.198	1.029	1.087	0.02558	0.5641	0.1041		0.0008137	0.0007219	1.1	-0.8667	-0.9241	-2.522	-0.9241	-1.731	-2.853	-2.522	-0.8667	-1.731	352759097220201	35.4663611	-97.3673417
352759097220201	<80.0	18.5	6.5	0.000316228	5	9.61611E-05	0.002073	1.272	1.029	1.044	0.02558	0.5641	0.1041		0.0008571	0.0007172	1.2	-0.804	-0.8197	-2.413	-0.8197	-1.685	-2.835	-2.413	-0.804	-1.685	352759097220201	35.4663611	-97.3673417
352759097220201	<80.0	19.9	6.5	0.000316228	5	9.61611E-05	0.002122	1.173	0.9875	0.9569	0.02558	0.5641	0.2082		0.0007839	0.0006838	1.1	-0.8116	-0.8083	-2.391	-0.8083	-1.658	-2.568	-2.391	-0.8116	-1.658	352759097220201	35.4663611	-97.3673417
352759097220201	<80.0	18.1	6.7	0.000199526	5	9.61611E-05	0.002135	1.173	0.9875	0.9569	0.02558	0.5641	0.1041		0.0007932	0.0006908	1.1	-0.6309	-0.4587	-2.055	-0.4587	-1.5	-2.862	-2.055	-0.6309	-1.5	352759097220201	35.4663611	-97.3673417
352812097052101	<143	17.6	7.4	3.98107E-05	2.7	5.1927E-05	0.002105	0.8433	0.5842	0.7699	0.0312	0.1943	0.02821	0.243	0.0005955	0.0004253	1.4	-0.06511	0.5837	-1.016	0.5837	-1.026	-3.514	-1.016	-0.06511	-1.026	352812097052101	35.47000556	-97.0893889
352816096554701	<96.3	18.5	8.9	1.25893E-06	2.5	4.80805E-05	0.004188	0.05988	0.05349	9.134	0.0179	0.8744	0.1562	0.1997	0.00003119	0.00003178	1	0.4219	1.718	0.1246	1.718	-0.3738	-4.052	0.1246	0.4219	-0.3738	352816096554701	35.47117868	-96.930024
352830097100301	<325	17.5	7.8	1.58489E-05	14	0.000269251	0.002075	0.7485	0.6994	1.696	0.05627	0.3103	0.09057	0.1581	0.0005159	0.0004992	1	0.2603	1.366	-0.2348	1.366	-0.5704	-3.076	-0.2348	0.2603	-0.5704	352830097100301	35.47506436	-97.1678074
352844097034401	<120	18.3	5.9	0.001258925	0.52	1.00008E-05	0.0004676	0.2363	0.1456	0.4611	0.01969	0.2065	0.09921	0.4227	0.0001927	0.0001201	1.6	-2.678	-4.698	-6.292	-4.698	-3.69	-3.368	-6.292	-2.678	-3.69	352844097034401	35.47896389	-97.0622167
352851097093801	<400	17	7.9	1.25893E-05	2.5	4.80805E-05	0.002015	0.6487	0.6172	2.349	0.05115	0.5641	0.1562	0.1581	0.0004426	0.0004371	1	0.2728	1.397	-0.2078	1.397	-0.5553	-2.9	-0.2078	0.2728	-0.5553	352851097093801	35.48284204	-97.1616963
352905097310201	<218	19.5	7.6	2.51189E-05	2.5	4.80805E-05	0.002885	1.722	1.234	1.74	0.03325	1.072	0.2082	0.3994	0.001076	0.000809	1.3	0.5389	1.826	0.2402	1.826	-0.3765	-2.47	0.2402	0.5389	-0.3765	352905097310201	35.48478199	-97.517539
352910097272501	<109	17.5	7.1	7.94328E-05	2.5	4.80805E-05	0.005046	3.743	2.757	4.785	0.0844	4.513	1.249	0.466	0.00188	0.001504	1.3	0.4724	1.707	0.1068	1.707	-0.4409	-1.563	0.1068	0.4724	-0.4409	352910097272501	35.48617166	-97.4572597
352910097272501	<109	18	7	0.0001	5	9.61611E-05	0.004149	2.32	1.81	3.132	0.07673	1.974	0.7287		0.001297	0.001079	1.2	0.149	1.081	-0.5162	1.081	-0.7411	-1.891	-0.5162	0.149	-0.7411	352910097272501	35.48617166	-97.4572597
352934097271502	<265	18.1	7.1	7.94328E-05	1.6	3.07715E-05	0.004403	1.809	1.164	3.841	0.05166	1.467	0.7287	0.2779	0.001024	0.0007022	1.5	0.1781	1.056	-0.5405	1.056	-0.7946	-1.961	-0.5405	0.1781	-0.7946	352934097271502	35.49277778	-97.4541667
353010097324601	<169	17.5	7.4	3.98107E-05	6	0.000115393	0.003418	1.397	1.152	4.35	0.06906	1.495	0.5934	0.3662	0.0008242	0.0007193	1.1	0.2668	1.334	-0.2667	1.334	-0.6087	-2.127	-0.2667	0.2668	-0.6087	353010097324601	35.50283656	-97.5464287
353013097373301	<822	20	8.7	1.99526E-06	36	0.00069236	0.002742	0.2096	0.107	6.09	0.01279	0.251	0.5726	0.1997	0.0001225	0.00006805	1.8	0.6712	1.962	0.38	1.962	-0.3696	-2.88	0.38	0.6712	-0.3696	353013097373301	35.5036684	-97.6261525
353021096595601	-999		7.2	6.30957E-05	5	9.61611E-05	0.004028	2.046	1.234	2.305		0.9308	0.1041		0.001224	0.0007823	1.6	0.4154	1.542	-0.002832	1.542	-0.5026	-2.743	-0.002832	0.4154	-0.5026	353021096595601	35.50589929	-96.999193
353024097272501	<160	17	7.1	7.94328E-05	2.5	4.80805E-05	0.004212	2.171	1.687	3.306	0.05115	1.692	0.3019	0.2996	0.001257	0.001037	1.2	0.2284	1.23	-0.3748	1.23	-0.6779	-2.278	-0.3748	0.2284	-0.6779	353024097272501	35.50672666	-97.45726
353026097274801	<164	17.5	7.2	6.30957E-05	2.5	4.80805E-05	0.004527	2.42	1.728	4.785	0.06906	2.228	0.8432	0.3495	0.001316	0.001007	1.3	0.3819	1.507	-0.09341	1.507	-0.5507	-1.827	-0.09341	0.3819	-0.5507	353026097274801	35.5072821	-97.463649
353040097000901	<135	17	6.5	0.000316228	2.5	4.80805E-05	0.001618	0.7735	0.6583	1.957	0.03069	0.818	0.3019	0.2829	0.0005289	0.0004651	1.1	-1.139	-1.477	-3.081	-1.477	-2.017	-2.543	-3.081	-1.139	-2.017	353040097000901	35.5111769	-97.0028042
353042097313801	<120	18.5	7.2	6.30957E-05	2.5	4.80805E-05	0.004025	1.722	2.098	3.045	0.0844	2.144	0.229	0.3994	0.001003	0.001297	0.8	0.2327	1.443	-0.1504	1.443	-0.4597	-2.496	-0.1504	0.2327	-0.4597	353042097313801	35.51172547	-97.5275395
353051097322001	<155	18	7.5	3.16228E-05	7	0.000134625	0.003051	1.123	1.07	6.09	0.0665	3.667	0.3852	0.2996	0.0006644	0.0006715	1	0.2298	1.327	-0.27	1.327	-0.5757	-2.405	-0.27	0.2298	-0.5757	353051097322001	35.51422517	-97.5392065
353101097283701	<100	18	7.1	7.94328E-05	2.5	4.80805E-05	0.0036	3.743	3.25	6.525	0.04092	7.898	2.082	0.3162	0.001803	0.001711	1.1	0.3107	1.461	-0.1356	1.461	-0.5222	-1.375	-0.1356	0.3107	-0.5222	353101097283701	35.5170038	-97.4772606
353131097325401	<174	18.5	7.8	1.58489E-05	2.5	4.80805E-05	0.004005	0.7984	0.8229	6.96	0.05115	0.7052	0.6975	0.2663	0.0004587	0.0005041	0.9	0.495	1.897	0.3036	1.897	-0.2679	-2.289	0.3036	0.495	-0.2679	353131097325401	35.5253357	-97.5486512
353136097295101	<140	17	7.2	6.30957E-05	2.5	4.80805E-05	0.003114	2.096	1.975	3.523	0.0179	5.641	0.09369	0.2996	0.001218	0.001222	1	0.1806	1.219	-0.3853	1.219	-0.6406	-2.811	-0.3853	0.1806	-0.6406	353136097295101	35.52672545	-97.4978169
353139097293001	<144	16	7.2	6.30957E-05	2.5	4.80805E-05	0.003523	2.121	2.057	1.261	0.0179	1.41	0.3227	0.2663	0.00126	0.00129	1	0.2384	1.337	-0.2747	1.337	-0.5866	-2.247	-0.2747	0.2384	-0.5866	353139097293001	35.5275588	-97.4919834
353141097293001	<161.5	17.5	7.2	6.30957E-05	2.5	4.80805E-05	0.00352	2.196	2.304	3.132	0.02046	4.795	0.1978	0.2663	0.001254	0.001404	0.9	0.2521	1.413	-0.188	1.413	-0.5155	-2.485	-0.188	0.2521	-0.5155	353141097293001	35.52061465	-97.4908722
353145097263801	<108	16	7.4	3.98107E-05	2.5	4.80805E-05	0.002708	1.572	1.275	0.783	0.0179	0.4231	0.1145	0.2829	0.00102	0.0008615	1.2	0.2419	1.261	-0.3513	1.261	-0.6666	-2.738	-0.3513	0.2419	-0.6666	353145097263801	35.52644836	-97.4442042
353145097263801	<108	16.6	7.2	6.30957E-05	5	9.61611E-05	0.00286	1.372	1.234	0.783	0.01279	0.141	0.1041		0.0008964	0.0008389	1.1	0.02118	0.8675	-0.7399	0.8675	-0.8353	-2.826	-0.7399	0.02118	-0.8353	353145097263801	35.52644836	-97.4442042
353145097263801	<108	16.5	7.2	6.30957E-05	5	9.61611E-05	0.003013	1.647	1.358	0.7395	0.01279	0.141	0.05205		0.001063	0.0009134	1.2	0.1136	1.014	-0.5937	1.014	-0.7814	-3.069	-0.5937	0.1136	-0.7814	353145097263801	35.52644836	-97.4442042
353145097263801	<108	16.4	7.1	7.94328E-05	5	9.61611E-05	0.003084	1.547	1.275	0.7395	0.01279	0.141	0.1041		0.0009974	0.000857	1.2	-0.003854	0.779	-0.8299	0.779	-0.9	-2.789	-0.8299	-0.003854	-0.9	353145097263801	35.52644836	-97.4442042
353145097263801	<108	16.1	7.2	6.30957E-05	5	9.61611E-05	0.003105	1.547	1.317	0.7395	0.01279	0.141	0.1041		0.0009952	0.0008837	1.1	0.09296	0.9851	-0.6262	0.985	-0.7927	-2.791	-0.6262	0.09296	-0.7927	353145097263801	35.52644836	-97.4442042
353145097263801	<108	16.7	7.2	6.30957E-05	5	9.61611E-05	0.003144	1.597	1.317	0.7395	0.01279	0.141	0.05205		0.001029	0.0008848	1.2	0.1213	1.032	-0.5751	1.032	-0.7707	-3.081	-0.5751	0.1213	-0.7707	353145097263801	35.52644836	-97.4442042
353155097294601	<141	15.6	7.2	6.30957E-05	5	9.61611E-05	0.003086	1.722	1.81	1.435	0.1023	2.539	0.2082		0.001047	0.00116	0.9	0.09803	1.088	-0.5268	1.088	-0.6978	-2.498	-0.5268	0.09803	-0.6978	353155097294601	35.53200305	-97.496428
353155097294601	<141	16.9	7.3	5.01187E-05	5	9.61611E-05	0.003175	1.846	1.851	1.348	0.07673	2.257	0.2082		0.001118	0.001181	0.9	0.2561	1.392	-0.213	1.392	-0.5437	-2.477	-0.213	0.2561	-0.5437	353155097294601	35.53200305	-97.496428
353155097294601	<141	17	7	0.0001	5	9.61611E-05	0.003388	1.747	1.81	1.305	0.07673	1.974	0.2082		0.001059	0.001156	0.9	-0.0349	0.8248	-0.7796	0.8248	-0.8194	-2.496	-0.7796	-0.0349	-0.8194	353155097294601	35.53200305	-97.496428
353155097294601	<141	17	7.2	6.30957E-05	5	9.61611E-05	0.003388	1.846	1.851	1.348	0.07673	1.974	0.2082		0.001114	0.001178	0.9	0.1851	1.251	-0.3535	1.251	-0.6133	-2.479	-0.3535	0.1851	-0.6133	353155097294601	35.53200305	-97.496428
353155097294601	<141	16.5	7.3	5.01187E-05	7	0.000134625	0.003257	1.771	1.81	1.392	0.07929	1.467	0.229	0.3495	0.001079	0.001161	0.9	0.2473	1.38	-0.2287	1.379	-0.55	-2.445	-0.2287	0.2473	-0.55	353155097294601	35.53200305	-97.496428
353155097294601	<141	16.8	7.2	6.30957E-05	10	0.000192322	0.003216	1.572	1.728	1.392	0.1023	2.257	0.2082		0.0009594	0.001111	0.9	0.0969	1.113	-0.4931	1.113	-0.6645	-2.53	-0.4931	0.0969	-0.6645	353155097294601	35.53200305	-97.496428
353209097271401	<340		7.1	7.94328E-05	5	9.61611E-05	0.002236	1.223	0.9463	1.348		0.8744	0.1041		0.0008105	0.0006522	1.2	-0.107	0.5968	-0.9476	0.5968	-0.9249	-2.868	-0.9476	-0.107	-0.9249	353209097271401	35.53589235	-97.4542046
353210097282401	<300	17.5	7.3	5.01187E-05	2.5	4.80805E-05	0.003153	1.971	1.893	4.35	0.07673	3.667	1.145	0.2663	0.001081	0.001111	1	0.2413	1.354	-0.2469	1.354	-0.5635	-1.769	-0.2469	0.2413	-0.5635	353210097282401	35.53616986	-97.4736496
353219097295801	<160	17	7.2	6.30957E-05	2.5	4.80805E-05	0.003704	2.27	2.304	1.218	0.09208	2.821	0.0812	0.3994	0.001334	0.001435	0.9	0.2966	1.481	-0.1231	1.481	-0.4944	-2.838	-0.1231	0.2966	-0.4944	353219097295801	35.5386694	-97.4997615
353223097320501	<760	18	8	0.00001	7	0.000134625	0.001637	0.8234	1.029	5.655	0.05371	5.641	0.4372	0.2496	0.000499	0.0006604	0.8	0.3335	1.651	0.05455	1.651	-0.3549	-2.459	0.05455	0.3335	-0.3549	353223097320501	35.53977989	-97.53504
353223097320501	<760	19	8.6	2.51189E-06	9.6	0.000184629	0.002662	0.3244	0.3991	8.265	0.03069	3.667	0.4268	0.2164	0.0001863	0.0002486	0.7	0.7205	2.435	0.8458	2.435	0.04821	-2.864	0.8458	0.7205	0.04821	353223097320501	35.53977989	-97.53504
353227097251101	<114	17	6.9	0.000125893	2.5	4.80805E-05	0.003581	1.821	1.893	0.609	0.01535	0.4513	0.1666	0.2496	0.001119	0.001221	0.9	-0.08505	0.7242	-0.8802	0.7241	-0.8699	-2.569	-0.8802	-0.08505	-0.8699	353227097251101	35.5408926	-97.420037
353229097285301	<143	17.5	7.4	3.98107E-05	2.5	4.80805E-05	0.002807	2.246	1.728	2.566	0.04348	3.667	0.4893	0.3495	0.001311	0.001069	1.2	0.3758	1.523	-0.07793	1.523	-0.529	-2.053	-0.07793	0.3758	-0.529	353229097285301	35.54144735	-97.4817054
353243097304101	<210	19	7.2	6.30957E-05	12	0.000230787	0.003597	1.747	1.646	1.261	0.06906	0.5641	0.1562	0.3662	0.001073	0.001063	1	0.2266	1.318	-0.2717	1.318	-0.5754	-2.61	-0.2717	0.2266	-0.5754	353243097304101	35.54533565	-97.5117062
353244097255801	<160	16.5	7	0.0001	2.5	4.80805E-05	0.002992	1.672	1.317	1.392	0.02046	0.8744	0.2186	0.2663	0.001052	0.0008668	1.2	-0.09462	0.58	-1.028	0.58	-1.008	-2.455	-1.028	-0.09462	-1.008	353244097255801	35.5456145	-97.433093
353303096544501	<68.1	17.5	7.3	5.01187E-05	2.5	4.80805E-05	0.003763	1.447	1.687	1.87	0.02813	0.3949	0.177	0.2829	0.0008871	0.001088	0.8	0.2421	1.432	-0.1684	1.432	-0.4858	-2.629	-0.1684	0.2421	-0.4858	353303096544501	35.5508997	-96.9128021
353308097290701	<750	18.3	8	0.00001	20.2	0.000388491	0.002572	0.6238	0.8352	3.58	0.0509	1.67	0.3644	0.233	0.0003923	0.0005535	0.7	0.4379	1.89	0.295	1.89	-0.2191	-2.61	0.295	0.4379	-0.2191	353308097290701	35.55228024	-97.4855945
353324097173701	<460	17.5	7.4	3.98107E-05	5	9.61611E-05	0.001993	1.098	0.9052	0.5655	0.04348	0.3385	0.08432	0.233	0.0007561	0.0006437	1.2	0.008815	0.8073	-0.7933	0.8072	-0.8775	-2.962	-0.7933	0.008815	-0.8775	353324097173701	35.5567271	-97.2939226
353324097173701	<460	17.5	7.6	2.51189E-05	7	0.000134625	0.001932	1.048	0.8229	0.522	0.04348	0.3103	0.076	0.233	0.0007272	0.0005896	1.2	0.1786	1.126	-0.4751	1.126	-0.729	-3.017	-0.4751	0.1786	-0.729	353324097173701	35.5567271	-97.2939226
353351096574601	<240	18	7.2	6.30957E-05	2.5	4.80805E-05	0.006569	1.148	1.481	9.134	0.06906	1.044	0.3644	0.2496	0.0006185	0.0008597	0.7	0.2258	1.457	-0.1396	1.457	-0.4413	-2.49	-0.1396	0.2258	-0.4413	353351096574601	35.5642321	-96.9630814
353411097374501	<635	19.5	7.5	3.16228E-05	48	0.000923146	0.002398	2.071	1.193	6.96	0.03069	0.2595	4.372	0.2663	0.0009594	0.0005996	1.6	0.2964	1.261	-0.3251	1.26	-0.6993	-1.233	-0.3251	0.2964	-0.6993	353411097374501	35.5697772	-97.6294867
353446097241101	<156	17.4	6.6	0.000251189	5	9.61611E-05	0.002777	1.771	1.563	1.348	0.01279	1.974	0.3123		0.001091	0.001011	1.1	-0.4982	-0.1706	-1.772	-0.1706	-1.349	-2.299	-1.772	-0.4982	-1.349	353446097241101	35.5790333	-97.403325
353446097241101	<156	18.4	6.7	0.000199526	5	9.61611E-05	0.002938	1.647	1.44	2.262	0.01279	2.539	0.3123		0.001003	0.0009231	1.1	-0.3969	0.03544	-1.558	0.03542	-1.238	-2.333	-1.558	-0.3969	-1.238	353446097241101	35.5790333	-97.403325
353446097241101	<156	18.5	6.6	0.000251189	5	9.61611E-05	0.002958	1.796	1.481	1.783	0.01279	2.257	0.3123		0.001094	0.0009496	1.2	-0.454	-0.104	-1.697	-0.104	-1.32	-2.3	-1.697	-0.454	-1.32	353446097241101	35.5790333	-97.403325
353446097241101	<156	17	6.8	0.000158489	5	9.61611E-05	0.003246	1.871	1.44	2.871	0.05115	2.257	0.4164		0.001114	0.0009053	1.2	-0.2313	0.3038	-1.301	0.3037	-1.144	-2.171	-1.301	-0.2313	-1.144	353446097241101	35.5790333	-97.403325
353532097285601	<500	17	7.7	1.99526E-05	9	0.00017309	0.001954	0.9481	1.358	4.785	0.07417	5.359	0.2499	0.2663	0.0005798	0.0008775	0.7	0.1627	1.362	-0.2427	1.362	-0.4801	-2.649	-0.2427	0.1627	-0.4801	353532097285601	35.59227885	-97.4825393
353539096554501	<131	17.5	7.1	7.94328E-05	2.5	4.80805E-05	0.003519	1.647	1.81	2.131	0.2148	1.213	0.354	0.2164	0.0009859	0.001143	0.9	0.05698	1.038	-0.563	1.038	-0.6953	-2.296	-0.563	0.05698	-0.6953	353539096554501	35.5942321	-96.9294696
353539096554701	<120	19.5	7.1	7.94328E-05	5	9.61611E-05	0.003352	1.272	1.481	2.044	0.02558	0.141	0.05205		0.0008076	0.0009828	0.8	-0.01565	0.9258	-0.6598	0.9258	-0.7219	-3.188	-0.6598	-0.01565	-0.7219	353539096554701	35.59408056	-96.9295889
353539096554701	<120	17.3	7.1	7.94328E-05	5	9.61611E-05	0.003682	1.223	1.44	2.088	0.05115	0.141	0.05205		0.0007711	0.0009508	0.8	-0.02687	0.8955	-0.7066	0.8955	-0.7548	-3.203	-0.7066	-0.02687	-0.7548	353539096554701	35.59408056	-96.9295889
353539096554701	<120	17.7	6.9	0.000125893	5	9.61611E-05	0.003732	1.223	1.399	1.957	0.05115	0.141	0.05205		0.0007718	0.0009244	0.8	-0.2134	0.5122	-1.087	0.5122	-0.949	-3.202	-1.087	-0.2134	-0.949	353539096554701	35.59408056	-96.9295889
353539096554701	<120	17.2	7.2	6.30957E-05	5	9.61611E-05	0.003764	1.223	1.44	2.044	0.05115	0.141	0.05205		0.0007689	0.0009489	0.8	0.07938	1.108	-0.4951	1.108	-0.6494	-3.205	-0.4951	0.07938	-0.6494	353539096554701	35.59408056	-96.9295889
353539096554701	<120	18	7.1	7.94328E-05	5	9.61611E-05	0.004474	1.422	1.605	2.131	0.05115	0.141	0.05205		0.0008652	0.001029	0.8	0.1145	1.167	-0.4298	1.167	-0.6202	-3.171	-0.4298	0.1145	-0.6202	353539096554701	35.59408056	-96.9295889
353539097243901	<100	17	6.5	0.000316228	2.5	4.80805E-05	0.001058	0.6986	0.6172	0.4045	0.03581	0.2764	0.3019	0.2164	0.0005039	0.0004563	1.1	-1.339	-1.864	-3.468	-1.864	-2.204	-2.542	-3.468	-1.339	-2.204	353539097243901	35.59422428	-97.4111485
353600097264001	<158	17	7.3	5.01187E-05	2.5	4.80805E-05	0.002991	1.497	1.07	1.609	0.02302	0.4795	0.1353	0.3495	0.0009607	0.000717	1.3	0.1745	1.078	-0.5262	1.078	-0.7753	-2.687	-0.5262	0.1745	-0.7753	353600097264001	35.5083934	-97.444204
353631097232301	<160	17.5	7.4	3.98107E-05	2.5	4.80805E-05	0.003072	1.672	1.07	2.305	0.03325	0.959	0.4164	0.3162	0.001027	0.0006909	1.5	0.3184	1.324	-0.2765	1.324	-0.6702	-2.182	-0.2765	0.3184	-0.6702	353631097232301	35.60866856	-97.3900369
353634097120701	<160		7.2	6.30957E-05	5	9.61611E-05	0.003117	1.747	1.399	0.6525		0.2821	0.1041		0.001101	0.0009242	1.2	0.2627	1.355	-0.1897	1.355	-0.5368	-2.774	-0.1897	0.2627	-0.5368	353634097120701	35.60950486	-97.2022542
353719096594601	-999		7.1	7.94328E-05	5	9.61611E-05	0.002814	14.2	4.279	2.001		5.444	1.541		0.006546	0.002154	3	0.8198	2.062	0.5177	2.062	-0.3865	-1.14	0.5177	0.8198	-0.3865	353719096594601	35.6220083	-96.9964162
353753097273501	<649	17	7.5	3.16228E-05	2.5	4.80805E-05	0.002594	1.248	1.111	0.6525	0.03581	0.141	0.05726	0.3828	0.0008323	0.0007693	1.1	0.2534	1.329	-0.2754	1.329	-0.6035	-3.106	-0.2754	0.2534	-0.6035	353753097273501	35.63144447	-97.460039
353814097235601	<180		7.1	7.94328E-05	5	9.61611E-05	0.001953	1.223	0.9875	0.2175		0.141	0.1041		0.0008352	0.0006974	1.2	-0.1501	0.5268	-1.018	0.5268	-0.9519	-2.848	-1.018	-0.1501	-0.9519	353814097235601	35.63727858	-97.3992041
353819097254901	<625	18	7.7	1.99526E-05	17	0.000326948	0.002542	0.9232	0.864	2.131	0.03836	0.3385	0.1145	0.3329	0.000613	0.0005971	1	0.3268	1.505	-0.09203	1.505	-0.4948	-2.921	-0.09203	0.3268	-0.4948	353819097254901	35.6386669	-97.4305939
353819097270701	<707	16.5	7.5	3.16228E-05	2.5	4.80805E-05	0.002524	1.297	1.111	0.6525	0.03069	0.1946	0.06246	0.3828	0.0008652	0.0007693	1.1	0.2507	1.304	-0.3046	1.304	-0.6293	-3.053	-0.3046	0.2507	-0.6293	353819097270701	35.63866656	-97.4522612
353819097305101	<515	18	7.5	3.16228E-05	11	0.000211554	0.002623	0.9731	1.07	1.609	0.04092	0.2792	0.1249	0.3495	0.0006432	0.0007357	0.9	0.1615	1.244	-0.3528	1.244	-0.5903	-2.872	-0.3528	0.1615	-0.5903	353819097305101	35.63866556	-97.514485
353909097304501	<510	17.5	7.5	3.16228E-05	7	0.000134625	0.002533	1.123	1.029	1.261	0.03581	0.2482	0.09369	0.3828	0.0007477	0.0007116	1.1	0.2042	1.246	-0.3542	1.246	-0.6337	-2.934	-0.3542	0.2042	-0.6337	353909097304501	35.652554	-97.5108739
353915097403901	<600	20.5	8.4	3.98107E-06	7.5	0.000144242	0.000346	10.98	4.114	47.85	0.11	6.487	38.52	0.1465	0.002362	0.001041	2.3	0.6585	1.839	0.2609	1.839	-0.4766	-0.1577	0.2609	0.6585	-0.4766	353915097403901	35.65421809	-97.677822
353938097031101	<91	17	8.3	5.01187E-06	2.5	4.80805E-05	0.004193	0.1472	0.1029	16.96	0.03836	7.898	0.9786	0.1481	0.0000738	0.00005704	1.3	0.1828	1.11	-0.4942	1.11	-0.7517	-2.946	-0.4942	0.1828	-0.7517	353938097031101	35.6606176	-97.0533624
354001097270701	<749		7.6	2.51189E-05	44	0.000846217	0.002601	1.672	0.6994	3.001		0.3667	0.1041		0.001072	0.0004691	2.3	0.5723	1.691	0.1465	1.691	-0.5102	-2.764	0.1465	0.5723	-0.5102	354001097270701	35.6669989	-97.4522614
354012097231001	120	16.5	7.3	5.01187E-05	2.5	4.80805E-05	0.003226	1.472	1.358	0.5655	0.02302	0.3385	0.2603	0.3162	0.0009289	0.0008972	1	0.1848	1.208	-0.4003	1.208	-0.6592	-2.423	-0.4003	0.1848	-0.6592	354012097231001	35.67005549	-97.3864264
354012097231001	120	16.5	7.3	5.01187E-05	2.5	4.80805E-05	0.003226	1.472	1.358	0.5655	0.02302	0.3385	0.2603	0.3162	0.0009289	0.0008972	1	0.1848	1.208	-0.4003	1.208	-0.6592	-2.423	-0.4003	0.1848	-0.6592	354012097231001	35.67005549	-97.3864264
354012097231001	165	17.5	8.9	1.25893E-06	5	9.61611E-05	0.003794	0.08733	0.07406	6.96	0.01535	0.3667	0.2082	0.1548	0.00004751	0.0000455	1	0.5523	1.945	0.3448	1.945	-0.2829	-3.73	0.3448	0.5523	-0.2829	354012097231001	35.67005549	-97.3864264
354105097332401	<460	18.5	7.8	1.58489E-05	32	0.000615431	0.002582	0.6238	0.7406	3.262	0.007673	0.1946	0.3227	0.2829	0.0004053	0.0005029	0.8	0.2616	1.483	-0.1105	1.483	-0.4486	-2.638	-0.1105	0.2616	-0.4486	354105097332401	35.68338555	-97.5569864
354105097332401	<460		7.4	3.98107E-05	35	0.000673127	0.002469	1.547	0.864	2.871		0.141	0.1041		0.001002	0.0005834	1.7	0.3224	1.315	-0.2292	1.315	-0.636	-2.793	-0.2292	0.3224	-0.636	354105097332401	35.68338555	-97.5569864
354143096564301	<89.0	17	8	0.00001	2.5	4.80805E-05	0.003154	0.3493	0.3333	5.655	0.03581	0.677	0.2082	0.233	0.0002222	0.0002235	1	0.2642	1.387	-0.2173	1.387	-0.5561	-3.072	-0.2173	0.2642	-0.5561	354143096564301	35.6953413	-96.9455821
354143096564301	<89.0	16.9	7.9	1.25893E-05	5	9.61611E-05	0.00292	0.4491	0.4526	6.655	0.05115	2.257	0.1041		0.0002834	0.0003011	0.9	0.2319	1.346	-0.2594	1.346	-0.5659	-3.286	-0.2594	0.2319	-0.5659	354143096564301	35.6953413	-96.9455821
354143096564301	<89.0	17.1	7.9	1.25893E-05	5	9.61611E-05	0.003042	0.3743	0.3703	6.699	0.05115	1.692	0.1041		0.0002376	0.0002475	1	0.1773	1.229	-0.3742	1.229	-0.6263	-3.355	-0.3742	0.1773	-0.6263	354143096564301	35.6953413	-96.9455821
354143096564301	<89.0	17.8	7.9	1.25893E-05	5	9.61611E-05	0.003061	0.3992	0.4114	6.655	0.05115	1.692	0.1041		0.0002526	0.0002743	0.9	0.2163	1.33	-0.2685	1.33	-0.5606	-3.332	-0.2685	0.2163	-0.5606	354143096564301	35.6953413	-96.9455821
354143096564301	<89.0	18.1	7.9	1.25893E-05	5	9.61611E-05	0.003111	0.3493	0.3292	6.481	0.05115	0.8462	0.1041		0.0002238	0.0002217	1	0.1773	1.214	-0.3823	1.214	-0.6357	-3.375	-0.3823	0.1773	-0.6357	354143096564301	35.6953413	-96.9455821
354143096564301	<89.0	17.6	7.9	1.25893E-05	5	9.61611E-05	0.003661	0.3992	0.3703	6.829	0.05115	1.41	0.1041		0.0002477	0.0002432	1	0.282	1.416	-0.1836	1.416	-0.5411	-3.342	-0.1836	0.282	-0.5411	354143096564301	35.6953413	-96.9455821
354150097304401	<600		7.5	3.16228E-05	5	9.61611E-05	0.002277	0.8483	0.864	1.435		0.141	0.1041		0.0005732	0.0006065	0.9	0.1526	1.235	-0.3093	1.235	-0.5464	-2.994	-0.3093	0.1526	-0.5464	354150097304401	35.69727458	-97.512541
354150097304401	<600		7.1	7.94328E-05	14	0.000269251	0.002591	2.37	1.193	1.566		0.141	0.1041		0.001497	0.0007868	1.9	0.2128	1.052	-0.4929	1.052	-0.7901	-2.659	-0.4929	0.2128	-0.7901	354150097304401	35.69727458	-97.512541
354150097304401	<600		7.7	1.99526E-05	40	0.000769288	0.002429	0.7735	0.6994	2.61		0.4231	0.1041		0.0005141	0.000485	1.1	0.3314	1.543	-0.001643	1.543	-0.4174	-3.038	-0.001643	0.3314	-0.4174	354150097304401	35.69727458	-97.512541
354221097272501	<180	18.1	7.3	5.01187E-05	5	9.61611E-05	0.002806	1.771	1.193	1.174	0.01279	1.128	0.2082		0.001118	0.0007884	1.4	0.2261	1.164	-0.4325	1.164	-0.7347	-2.45	-0.4325	0.2261	-0.7347	354221097272501	35.70580556	-97.4567722
354221097272501	<180	17.3	7.2	6.30957E-05	5	9.61611E-05	0.002909	1.846	1.275	1.479	0.01279	1.692	0.2082		0.001149	0.0008327	1.4	0.1405	0.9994	-0.6027	0.9994	-0.8183	-2.446	-0.6027	0.1405	-0.8183	354221097272501	35.70580556	-97.4567722
354221097272501	<180	17.5	7.2	6.30957E-05	5	9.61611E-05	0.002919	1.647	1.234	1.609	0.01279	1.692	0.2082		0.00103	0.0008094	1.3	0.09881	0.9524	-0.6481	0.9524	-0.8223	-2.485	-0.6481	0.09881	-0.8223	354221097272501	35.70580556	-97.4567722
354221097272501	<180	17.8	7.2	6.30957E-05	5	9.61611E-05	0.002959	1.896	1.317	1.392	0.01279	1.692	0.2082		0.001176	0.0008574	1.4	0.1647	1.053	-0.5448	1.053	-0.7852	-2.44	-0.5448	0.1647	-0.7852	354221097272501	35.70580556	-97.4567722
354221097272501	<180	16.9	7.1	7.94328E-05	5	9.61611E-05	0.002992	1.771	1.358	1.566	0.01279	1.692	0.2082		0.001099	0.0008848	1.2	0.02802	0.8175	-0.7876	0.8175	-0.8902	-2.465	-0.7876	0.02802	-0.8902	354221097272501	35.70580556	-97.4567722
354233097020701	-999		7.2	6.30957E-05	5	9.61611E-05	0.004211	8.807	3.045	7.395		6.967	0.5413		0.004243	0.001603	2.6	0.9253	2.333	0.7888	2.333	-0.2209	-1.699	0.7888	0.9253	-0.2209	354233097020701	35.7092281	-97.0355846
354235097021501	<136.50	17.3	6.8	0.000158489	5	9.61611E-05	0.002747	3.618	3.168	6.438		10.35	0.7287		0.00187	0.001778	1.1	-0.09724	0.6418	-0.9603	0.6418	-0.9381	-1.813	-0.9603	-0.09724	-0.9381	354235097021501	35.7097836	-97.0378069
354243097285301	<400		7.1	7.94328E-05	5	9.61611E-05	0.00007597	1.871	0.4526	1.218		0.4795	24.36		0.0004434	0.0001233	3.6	-1.877	-3.405	-4.95	-3.405	-3.157	-0.8937	-4.95	-1.877	-3.157	354243097285301	35.71199679	-97.4817071
354248097191601	-999		7	0.0001	5	9.61611E-05	0.003066	1.622	1.522	1.305		0.5359	0.1041		0.001017	0.001001	1	0.02172	0.9416	-0.6028	0.9416	-0.7089	-2.811	-0.6028	0.02172	-0.7089	354248097191601	35.7133886	-97.3214251
354251097040901	<257	17.4	7.5	3.16228E-05	5	9.61611E-05	0.004964	0.4491	0.576	7.09		0.3949	0.1041		0.0002703	0.0003678	0.7	0.04873	1.09	-0.5113	1.09	-0.6352	-3.32	-0.5113	0.04873	-0.6352	354251097040901	35.71422725	-97.0694744
354307097032501	<162.00	18	9	0.000001	5	9.61611E-05	0.003396	0.07485	0.08229	6.916		0.5641	0.2082		0.00004038	0.00005051	0.8	0.5328	2.025	0.4287	2.025	-0.1801	-3.798	0.4287	0.5328	-0.1801	354307097032501	35.71867187	-97.0572519
354308097274101	-999		7	0.0001	5	9.61611E-05	0.002439	1.572	0.9463	0.9134		0.3667	0.1041		0.001033	0.0006469	1.6	-0.06565	0.5708	-0.9736	0.5708	-0.9923	-2.776	-0.9736	-0.06565	-0.9923	354308097274101	35.71894136	-97.4617067
354326097044401	<197	17.6	7.7	1.99526E-05	5	9.61611E-05	0.004821	0.5739	0.6583	6.351		0.141	0.1041		0.0003461	0.0004215	0.8	0.3452	1.636	0.03619	1.636	-0.3844	-3.216	0.03619	0.3452	-0.3844	354326097044401	35.72394905	-97.0791969
354330097054701	<185	16.7	7.4	3.98107E-05	5	9.61611E-05	0.003033	1.173	0.9875	1.914		0.7334	0.1041		0.0007585	0.0006671	1.1	0.1752	1.149	-0.4575	1.149	-0.707	-2.887	-0.4575	0.1752	-0.707	354330097054701	35.72505974	-97.0966974
354332097295301	<465	17.5	7.4	3.98107E-05	2.5	4.80805E-05	0.002624	1.297	0.9052	1.087	0.02558	0.3103	0.08432	0.3662	0.0008616	0.0006248	1.4	0.1813	1.082	-0.5181	1.082	-0.7747	-2.92	-0.5181	0.1813	-0.7747	354332097295301	35.7256071	-97.4983744
354332097295301	<465		7.2	6.30957E-05	5	9.61611E-05	0.002449	2.37	1.07	1.044		0.3103	0.1041		0.001512	0.000712	2.1	0.2934	1.165	-0.3793	1.165	-0.7572	-2.649	-0.3793	0.2934	-0.7572	354332097295301	35.7256071	-97.4983744
354339097030501	<85	17.1	6.6	0.000251189	5	9.61611E-05	0.001343	0.8733	0.6172	2.871		2.2	0.406		0.0005796	0.0004253	1.4	-1.082	-1.442	-3.045	-1.442	-2.038	-2.387	-3.045	-1.082	-2.038	354339097030501	35.7275607	-97.0516963
354400097224501	-999		7.4	3.98107E-05	5	9.61611E-05	0.002327	0.998	0.864	1.522		0.3949	0.1041		0.0006674	0.0006009	1.1	0.127	1.114	-0.4308	1.114	-0.6422	-2.937	-0.4308	0.127	-0.6422	354400097224501	35.73338688	-97.3794824
354400097225301	-999		7.4	3.98107E-05	5	9.61611E-05	0.0009819	3.244	2.51	6.177		15.54	0.1041		0.001761	0.001471	1.2	0.1357	1.098	-0.4459	1.098	-0.666	-2.683	-0.4459	0.1357	-0.666	354400097225301	35.7333868	-97.3817047
354443097041301	<104	17.4	7.7	1.99526E-05	13	0.000250019	0.002441	0.6737	0.6583	2.523		0.4231	0.2707		0.0004464	0.0004544	1	0.1656	1.198	-0.4036	1.198	-0.6443	-2.666	-0.4036	0.1656	-0.6443	354443097041301	35.74533768	-97.0705858
354448097061901	<180	12.3	8.8	1.58489E-06	5	9.61611E-05	0.002225	0.1248	0.08229	4.48		0.3385	0.1041		0.00008176	0.00005776	1.4	0.3989	1.473	-0.1671	1.473	-0.6347	-3.756	-0.1671	0.3989	-0.6347	354448097061901	35.7467257	-97.1055867
354449097043701	<271	16.2	7	0.0001	5	9.61611E-05	0.001608	0.5489	0.4526	1.348		0.3103	0.1041		0.0003977	0.0003366	1.2	-0.7726	-0.7664	-2.377	-0.7664	-1.678	-3.096	-2.377	-0.7726	-1.678	354449097043701	35.74700415	-97.0772527
354506097263601	<302	17	7.4	3.98107E-05	2.5	4.80805E-05	0.002666	1.447	1.152	0.6525	0.02302	0.2792	0.07496	0.3495	0.0009527	0.0007886	1.2	0.2222	1.219	-0.3856	1.219	-0.6826	-2.942	-0.3856	0.2222	-0.6826	354506097263601	35.75171835	-97.443651
354514097222101	<412	17	7.4	3.98107E-05	2.5	4.80805E-05	0.002747	1.597	1.111	0.5655	0.02558	0.2595	0.07704	0.3828	0.001046	0.0007569	1.4	0.2748	1.266	-0.3387	1.266	-0.6882	-2.894	-0.3387	0.2748	-0.6882	354514097222101	35.7539419	-97.3728158
354520097040801	<118	17.3	7.2	6.30957E-05	5	9.61611E-05	0.003276	2.42	1.81	5.002		3.864	1.697		0.001269	0.001021	1.2	0.2215	1.207	-0.3953	1.207	-0.6918	-1.542	-0.3953	0.2215	-0.6918	354520097040801	35.75561527	-97.069197
354602097021601	<124	17.3	7.9	1.25893E-05	5	9.61611E-05	0.004191	0.3743	0.4114	6.655		0.5077	0.1041		0.0002304	0.0002685	0.9	0.305	1.535	-0.06732	1.535	-0.4474	-3.373	-0.06732	0.305	-0.4474	354602097021601	35.7672824	-97.0380852
354605097185901	<100	17	7.2	6.30957E-05	2.5	4.80805E-05	0.003724	2.495	2.839	2.871	0.02813	4.795	0.2915	0.3162	0.001391	0.001693	0.8	0.3102	1.562	-0.04215	1.562	-0.427	-2.292	-0.04215	0.3102	-0.427	354605097185901	35.7681093	-97.3167033
354606097045601	102	17.2	7.5	3.16228E-05	5	9.61611E-05	0.002452	1.023	0.9052	1.392		0.5923	0.1041		0.0006842	0.000629	1.1	0.1485	1.118	-0.4848	1.118	-0.7082	-2.917	-0.4848	0.1485	-0.7082	354606097045601	35.76839245	-97.0825307
354606097315601	<180	17.5	7.3	5.01187E-05	2.5	4.80805E-05	0.002909	1.846	0.9875	0.8265	0.01023	0.2821	0.0989	0.3495	0.001193	0.0006651	1.8	0.2629	1.132	-0.469	1.132	-0.8072	-2.737	-0.469	0.2629	-0.8072	354606097315601	35.7683829	-97.5325423
354607097030401	<138	16.8	8.8	1.58489E-06	5	9.61611E-05	0.00403	0.0499	0.04114	7.873		0.677	0.1041		0.00002773	0.00002558	1.1	0.2407	1.301	-0.3044	1.301	-0.6195	-4.267	-0.3044	0.2407	-0.6195	354607097030401	35.76867096	-97.0514189
354620097315201	<90.0	18	7.3	5.01187E-05	2.5	4.80805E-05	0.002746	2.994	1.769	2.61	0.01279	2.398	0.6767	0.3162	0.001723	0.001078	1.6	0.3888	1.436	-0.1603	1.436	-0.6251	-1.816	-0.1603	0.3888	-0.6251	354620097315201	35.7722717	-97.5314312
354629097180601	-999		6.4	0.000398107	5	9.61611E-05	0.002955	1.372	1.275	1.261		0.4513	0.1041		0.0008782	0.0008532	1	-0.651	-0.4092	-1.954	-0.4092	-1.387	-2.855	-1.954	-0.651	-1.387	354629097180601	35.77477609	-97.3019808
354630097190901	-999		6.9	0.000125893	5	9.61611E-05	0.002864	1.547	0.9875	1		0.3949	0.1041		0.0009991	0.0006662	1.5	-0.1106	0.508	-1.036	0.508	-1.01	-2.793	-1.036	-0.1106	-1.01	354630097190901	35.7750535	-97.3194813
354631097215501	<127	16.5	7	0.0001	2.5	4.80805E-05	0.00173	1.048	0.8229	1.087	0.01023	0.7334	0.2394	0.3495	0.0007145	0.0005798	1.2	-0.4902	-0.2178	-1.826	-0.2178	-1.41	-2.529	-1.826	-0.4902	-1.41	354631097215501	35.7753303	-97.3655936
354633097030801	<398	17.5	9.1	7.94328E-07	20	0.000384644	0.003906	0.02745	0.01975	8.265	0.01023	0.3103	0.1353	0.1614	0.00001376	0.00001157	1.2	0.207	1.198	-0.4023	1.198	-0.6847	-4.458	-0.4023	0.207	-0.6847	354633097030801	35.775893	-97.05253
354637097030801	<411	17.5	9.2	6.30957E-07	7	0.000134625	0.003916	0.02495	0.01358	8.265	0.01023	0.2454	0.1874	0.1581	0.00001188	0.000007706	1.5	0.2314	1.134	-0.4663	1.134	-0.7731	-4.381	-0.4663	0.2314	-0.7731	354637097030801	35.77700409	-97.05253
354654097030801	<412	17.5	9	0.000001	12	0.000230787	0.004069	0.02745	0.01728	8.265	0.01279	0.2651	0.1874	0.1614	0.0000141	0.00001024	1.4	0.1454	1.011	-0.5894	1.011	-0.8101	-4.307	-0.5894	0.1454	-0.8101	354654097030801	35.7817262	-97.05253
354702097020101	<145	17.6	7.9	1.25893E-05	5	9.61611E-05	0.00417	0.499	0.6583	7.047		1.213	0.3331		0.0002949	0.0004147	0.7	0.41	1.828	0.2284	1.828	-0.2571	-2.782	0.2284	0.41	-0.2571	354702097020101	35.7839488	-97.0339185
354704097051101	<219.38	17.7	7.8	1.58489E-05	5	9.61611E-05	0.003153	0.6238	0.6172	3.915		0.5077	0.1041		0.0004041	0.0004191	1	0.3345	1.546	-0.05348	1.546	-0.4636	-3.13	-0.05348	0.3345	-0.4636	354704097051101	35.7845031	-97.0866976
354719097020501	<225	17.6	8.7	1.99526E-06	5	9.61611E-05	0.004028	0.1996	0.3292	7.482		0.7052	0.2915		0.0001107	0.0002023	0.5	0.7536	2.629	1.029	2.629	0.2004	-3.238	1.029	0.7536	0.2004	354719097020501	35.7886709	-97.0350297
354725097030501	<200	17.5	6.8	0.000158489	2.5	4.80805E-05	0.001037	0.6238	0.6172	1.479	0.02046	0.8462	0.5101	0.2663	0.0004303	0.0004392	1	-1.113	-1.357	-2.957	-1.357	-1.92	-2.39	-2.957	-1.113	-1.92	354725097030501	35.79033715	-97.0516968
354743097052301	<246.0	17.1	6.3	0.000501187	5	9.61611E-05	0.000468	0.3743	0.2469	0.6525		0.4231	0.229		0.00029	0.0001946	1.5	-2.123	-3.563	-5.166	-3.563	-3.118	-2.852	-5.166	-2.123	-3.118	354743097052301	35.7953361	-97.090031
354747097035001	<181	17.2	7.5	3.16228E-05	5	9.61611E-05	0.003703	0.7735	0.864	5.916		2.257	0.3435		0.0004625	0.0005477	0.8	0.1491	1.229	-0.3735	1.229	-0.5976	-2.588	-0.3735	0.1491	-0.5976	354747097035001	35.7964478	-97.0641971
354749097223601	-999		7.4	3.98107E-05	5	9.61611E-05	0.001518	1.297	0.9052	0.696		1.128	0.229		0.000873	0.0006312	1.4	0.05663	0.8777	-0.6667	0.8777	-0.8077	-2.49	-0.6667	0.05663	-0.8077	354749097223601	35.7969961	-97.376983
354755097392001	<81	18	7	0.0001	2.5	4.80805E-05	0.003713	5.988	2.098	7.83	0.05627	7.898	3.644	0.5992	0.002669	0.001031	2.6	0.3887	1.227	-0.3699	1.227	-0.8345	-0.985	-0.3699	0.3887	-0.8345	354755097392001	35.79865826	-97.655879
354755097392001	<81	16.5	7.1	7.94328E-05	5	9.61611E-05	0.00339	4.84	1.605	8.091	0.05115	5.077	4.164		0.002168	0.0007888	2.7	0.3429	1.1	-0.5082	1.1	-0.9251	-0.9805	-0.5082	0.3429	-0.9251	354755097392001	35.79865826	-97.655879
354755097392001	<81	17.9	7	0.0001	5	9.61611E-05	0.003469	4.716	1.522	8.047	0.05115	4.795	4.372		0.002091	0.0007409	2.8	0.2591	0.9296	-0.6679	0.9296	-1.003	-0.9731	-0.6679	0.2591	-1.003	354755097392001	35.79865826	-97.655879
354755097392001	<81	17.7	7	0.0001	5	9.61611E-05	0.00353	6.287	1.646	8.091	0.05115	5.077	5.101		0.00269	0.0007768	3.5	0.3667	1.055	-0.5444	1.055	-0.9867	-0.8286	-0.5444	0.3667	-0.9867	354755097392001	35.79865826	-97.655879
354755097392001	<81	17.9	7	0.0001	5	9.61611E-05	0.003601	3.942	1.358	7.395	0.05115	5.077	3.019		0.001864	0.0007006	2.7	0.2303	0.8977	-0.6999	0.8977	-1.006	-1.163	-0.6999	0.2303	-1.006	354755097392001	35.79865826	-97.655879
354755097392001	<81	17.3	7	0.0001	10	0.000192322	0.003389	4.666	1.522	7.699	0.05115	4.795	3.54		0.002156	0.0007685	2.8	0.2546	0.9194	-0.6827	0.9194	-1.012	-1.049	-0.6827	0.2546	-1.012	354755097392001	35.79865826	-97.655879
354758097295201	<81	17.5	8.3	5.01187E-06	36	0.00069236	0.002258	0.4741	0.4032	8.7	0.02813	3.385	1.353	0.1997	0.000262	0.0002396	1.1	0.4821	1.785	0.1843	1.785	-0.3732	-2.227	0.1843	0.4821	-0.3732	354758097295201	35.7994934	-97.4980974
354758097323901	-999		6.2	0.000630957	5	9.61611E-05	0.002307	1.946	1.728	2.566		4.287	0.76		0.001123	0.001058	1.1	-0.8599	-0.8404	-2.385	-0.8404	-1.609	-1.933	-2.385	-0.8599	-1.609	354758097323901	35.79949287	-97.5444875
354817097281101	<206	17	7.4	3.98107E-05	2.5	4.80805E-05	0.002483	1.522	0.7817	1.305	0.0179	0.3469	0.2811	0.3162	0.0009917	0.0005303	1.9	0.2094	1.003	-0.601	1.003	-0.8851	-2.342	-0.601	0.2094	-0.8851	354817097281101	35.80477164	-97.4700412
354817097281101	<206		6.8	0.000158489	5	9.61611E-05	0.002641	5.14	1.029	1.218		0.5077	0.1041		0.003045	0.0006404	4.8	0.216	0.6601	-0.8843	0.6601	-1.185	-2.435	-0.8843	0.216	-1.185	354817097281101	35.80477164	-97.4700412
354817097281101	<206		7.2	6.30957E-05	5	9.61611E-05	0.003096	1.697	1.358	1		0.5077	0.2915		0.00105	0.0008833	1.2	0.239	1.308	-0.2361	1.308	-0.5595	-2.346	-0.2361	0.239	-0.5595	354817097281101	35.80477164	-97.4700412
354834097051501	<325	16.8	8.8	1.58489E-06	5	9.61611E-05	0.004193	0.07485	0.04114	10.74		2.003	0.583		0.00003841	0.00002382	1.6	0.3909	1.429	-0.1766	1.429	-0.6419	-3.405	-0.1766	0.3909	-0.6419	354834097051501	35.8095025	-97.0878089
354844097004501	<416	18	7.6	2.51189E-05	6	0.000115393	0.00301	0.9232	1.152	2.479	0.0844	0.3949	0.1249	0.3329	0.0005947	0.0007757	0.8	0.2842	1.546	-0.05034	1.546	-0.4105	-2.913	-0.05034	0.2842	-0.4105	354844097004501	35.80867107	-97.0122514
354844097004502	<450		8.8	1.58489E-06	5	9.61611E-05	0.002823	1.472	0.9463	3.349		0.141	0.1041		0.000841	0.0005956	1.4	1.655	4.066	2.521	4.066	0.7818	-2.863	2.521	1.655	0.7818	354844097004502	35.81228209	-97.012807
354844097034401	<230	17.3	8.7	1.99526E-06	32	0.000615431	0.001699	0.1497	0.08229	5.046		1.918	0.3019		0.00009646	0.00005643	1.7	0.326	1.277	-0.3247	1.277	-0.7257	-3.242	-0.3247	0.326	-0.7257	354844097034401	35.81228086	-97.0625305
354844097034401	<230	17.3	8.7	1.99526E-06	35	0.000673127	0.001699	0.1747	0.1234	5.046		1.89	0.2499		0.0001131	0.00008497	1.3	0.3946	1.523	-0.07884	1.523	-0.5485	-3.258	-0.07884	0.3946	-0.5485	354844097034401	35.81228086	-97.0625305
354908097250201	-999		6.2	0.000630957	5	9.61611E-05	0.001478	2.246	1.522	1.696		6.234	0.1041		0.001378	0.0009822	1.4	-0.964	-1.17	-2.714	-1.17	-1.835	-2.711	-2.714	-0.964	-1.835	354908097250201	35.818939	-97.4175399
354914097010901	<114	17.5	7.4	3.98107E-05	2.5	4.80805E-05	0.003763	1.672	1.975	1.696	0.06138	0.8462	0.1353	0.3495	0.001011	0.001259	0.8	0.3952	1.745	0.1445	1.745	-0.326	-2.706	0.1445	0.3952	-0.326	354914097010901	35.82100278	-97.0191556
354914097010901	<114	18.4	7.2	6.30957E-05	5	9.61611E-05	0.003253	1.547	1.893	1.653	0.07673	0.8462	0.1041		0.0009587	0.00123	0.8	0.1249	1.223	-0.3706	1.223	-0.5719	-2.836	-0.3706	0.1249	-0.5719	354914097010901	35.82100278	-97.0191556
354914097010901	<114	18	7.2	6.30957E-05	5	9.61611E-05	0.00366	1.647	1.975	1.74	0.07673	0.8462	0.1041		0.001003	0.001266	0.8	0.1884	1.34	-0.2565	1.34	-0.5208	-2.824	-0.2565	0.1884	-0.5208	354914097010901	35.82100278	-97.0191556
354914097010901	<114	16.8	7.2	6.30957E-05	5	9.61611E-05	0.003673	1.522	1.851	1.74	0.07673	0.8462	0.1041		0.0009332	0.001193	0.8	0.1426	1.247	-0.3587	1.247	-0.5758	-2.845	-0.3587	0.1426	-0.5758	354914097010901	35.82100278	-97.0191556
354914097010901	<114	17.8	7.2	6.30957E-05	5	9.61611E-05	0.003671	1.497	1.893	1.74	0.07673	0.8462	0.1041		0.0009167	0.001219	0.8	0.149	1.283	-0.3151	1.283	-0.5398	-2.854	-0.3151	0.149	-0.5398	354914097010901	35.82100278	-97.0191556
354914097010901	<114	16.9	7.2	6.30957E-05	5	9.61611E-05	0.003734	1.472	1.851	1.696	0.07673	0.8462	0.1041		0.0009021	0.001193	0.8	0.1368	1.251	-0.3544	1.251	-0.5657	-2.858	-0.3544	0.1368	-0.5657	354914097010901	35.82100278	-97.0191556
354935097034401	<140	18.3	6.5	0.000316228	5	9.61611E-05	0.001647	0.7485	0.4937	2.305		0.7616	0.4997		0.0005011	0.0003426	1.5	-1.136	-1.572	-3.167	-1.572	-2.107	-2.344	-3.167	-1.136	-2.107	354935097034401	35.8264472	-97.0625306
354959097175901	<56.7	17	7.1	7.94328E-05	2.5	4.80805E-05	0.004538	2.121	2.016	1.305	0.02813	0.2398	0.1874	0.3329	0.00125	0.001256	1	0.26	1.379	-0.2256	1.379	-0.5604	-2.488	-0.2256	0.26	-0.5604	354959097175901	35.83310788	-97.3000368
355005097051401	<200	16.7	7.2	6.30957E-05	5	9.61611E-05	0.001791	1.697	0.6172	0.696		0.3949	0.1041		0.001162	0.0004361	2.7	-0.0645	0.2997	-1.307	0.2997	-1.317	-2.699	-1.307	-0.0645	-1.317	355005097051401	35.8347797	-97.0875313
355030097194001	-999		6.6	0.000251189	5	9.61611E-05	0.003754	1.297	0.9052	3.958		0.4795	0.1041		0.0008009	0.0005888	1.4	-0.3903	-0.009014	-1.553	-0.009014	-1.247	-2.891	-1.553	-0.3903	-1.247	355030097194001	35.8417181	-97.3280932
355034097145201	<310	18	7.8	1.58489E-05	8.2	0.000157704	0.006111	0.5065	0.5308	9.178	0.02225	0.6149	0.2499	0.1897	0.0002831	0.0003198	0.9	0.4608	1.837	0.2404	1.837	-0.2963	-2.938	0.2404	0.4608	-0.2963	355034097145201	35.8428722	-97.2477639
355052097284301	<180	18	7.2	6.30957E-05	2.5	4.80805E-05	0.002176	2.345	0.9052	0.87	0.01279	0.8462	0.2811	0.3329	0.001501	0.0006033	2.5	0.1415	0.7498	-0.847	0.7498	-1.064	-2.201	-0.847	0.1415	-1.064	355052097284301	35.84782557	-97.4789308
355052097284301	<180	18	7.1	7.94328E-05	5	9.61611E-05	0.002237	2.32	1.07	0.8265	0.01279	0.8462	0.2082		0.001486	0.0007136	2.1	0.0492	0.6423	-0.9545	0.6423	-1.08	-2.34	-0.9545	0.0492	-1.08	355052097284301	35.84782557	-97.4789308
355052097284301	<180	17.9	7.1	7.94328E-05	5	9.61611E-05	0.002257	2.171	1.029	0.783	0.01279	0.8462	0.2082		0.001398	0.0006895	2	0.02636	0.6078	-0.9898	0.6077	-1.092	-2.359	-0.9898	0.02636	-1.092	355052097284301	35.84782557	-97.4789308
355052097284301	<180	16.6	7.1	7.94328E-05	5	9.61611E-05	0.00227	2.295	1.07	0.8265	0.01279	0.8462	0.2082		0.001471	0.0007141	2.1	0.03086	0.6017	-1.006	0.6016	-1.111	-2.342	-1.006	0.03086	-1.111	355052097284301	35.84782557	-97.4789308
355052097284301	<180	19.1	7	0.0001	5	9.61611E-05	0.002317	2.246	1.111	0.783	0.01279	0.8462	0.2082		0.001436	0.0007398	1.9	-0.03373	0.5139	-1.075	0.5138	-1.118	-2.355	-1.075	-0.03373	-1.118	355052097284301	35.84782557	-97.4789308
355052097284301	<180	19.7	7	0.0001	5	9.61611E-05	0.002316	2.42	1.111	0.8265	0.01279	0.8462	0.2082		0.001539	0.0007361	2.1	0.003603	0.56	-1.024	0.56	-1.106	-2.333	-1.024	0.003603	-1.106	355052097284301	35.84782557	-97.4789308
355058097233001	<237.1	18.5	7.8	1.58489E-05	6	0.000115393	0.002033	0.6737	0.5349	2.697	0.0179	0.4795	0.229	0.2829	0.0004556	0.0003757	1.2	0.2117	1.205	-0.3877	1.205	-0.676	-2.723	-0.3877	0.2117	-0.676	355058097233001	35.8494942	-97.391984
355110097240301	-999	17.9	8.8	1.58489E-06	56.8	0.00109239	0.00359	0.0504	0.03608	7.525	0.01228	1.196	0.3061	0.1481	0.00002796	0.00002229	1.3	0.2097	1.183	-0.4146	1.183	-0.7001	-3.796	-0.4146	0.2097	-0.7001	355110097240301	35.85277778	-97.4008333
355112097062201	<238	17.3	6.4	0.000398107	5	9.61611E-05	0.001465	0.7984	0.8229	1.261		0.7334	0.3956		0.0005441	0.0005793	0.9	-1.265	-1.644	-3.246	-1.644	-2.057	-2.418	-3.246	-1.265	-2.057	355112097062201	35.85338995	-97.1064208
355120097233001	<30	17	6.5	0.000316228	2.5	4.80805E-05	0.0008037	0.499	0.395	0.3219	0.0179	0.1495	0.1874	0.2496	0.0003801	0.0003065	1.2	-1.575	-2.387	-3.992	-2.387	-2.491	-2.84	-3.992	-1.575	-2.491	355120097233001	35.8556051	-97.391984
355134097211101	<194	16.8	7.5	3.16228E-05	5	9.61611E-05	0.001669	1.123	0.9463	0.9569	0.01279	0.141	0.2082		0.0007702	0.0006696	1.2	0.02828	0.8509	-0.755	0.8509	-0.8577	-2.564	-0.755	0.02828	-0.8577	355134097211101	35.85951944	-97.3530806
355134097211101	<194	17.8	7.6	2.51189E-05	5	9.61611E-05	0.001708	1.098	0.864	0.87	0.01279	0.141	0.2082		0.0007542	0.0006127	1.2	0.1442	1.059	-0.5389	1.059	-0.7587	-2.569	-0.5389	0.1442	-0.7587	355134097211101	35.85951944	-97.3530806
355134097211101	<194	17	7.5	3.16228E-05	5	9.61611E-05	0.00175	1.098	0.9463	0.9569	0.01279	0.141	0.2082		0.0007512	0.0006684	1.1	0.04099	0.8877	-0.7167	0.8876	-0.8324	-2.574	-0.7167	0.04099	-0.8324	355134097211101	35.85951944	-97.3530806
355134097211101	<194	18.8	7.5	3.16228E-05	5	9.61611E-05	0.00187	1.148	0.9052	0.9134	0.01279	0.141	0.2082		0.0007806	0.0006363	1.2	0.1123	1.003	-0.5875	1.003	-0.7767	-2.561	-0.5875	0.1123	-0.7767	355134097211101	35.85951944	-97.3530806
355134097211101	<194	18.8	7.5	3.16228E-05	5	9.61611E-05	0.001992	1.248	0.9875	1	0.01279	0.141	0.2082		0.0008385	0.000687	1.2	0.169	1.119	-0.4719	1.119	-0.7178	-2.539	-0.4719	0.169	-0.7178	355134097211101	35.85951944	-97.3530806
355140097351001	<175		6.6	0.000251189	5	9.61611E-05	0.002985	1.896	1.152	3.219		2.257	0.6975		0.001106	0.0007121	1.6	-0.3551	0.003837	-1.541	0.003837	-1.27	-1.957	-1.541	-0.3551	-1.27	355140097351001	35.8611571	-97.5864338
355141097201401	<227	17.5	7.4	3.98107E-05	2.5	4.80805E-05	0.002858	1.547	1.234	2.175	0.03581	1.297	0.4164	0.3495	0.0009532	0.0007988	1.2	0.2548	1.292	-0.3082	1.292	-0.6383	-2.215	-0.3082	0.2548	-0.6383	355141097201401	35.85866187	-97.337538
355214096574801	<450	18	7.9	1.25893E-05	10	0.000192322	0.002705	0.4242	0.4937	3.915	0.05371	0.3385	0.1145	0.233	0.000282	0.0003427	0.8	0.2189	1.385	-0.2117	1.385	-0.5065	-3.226	-0.2117	0.2189	-0.5065	355214096574801	35.8706155	-96.9636395
355214096574801	<450		7.9	1.25893E-05	11	0.000211554	0.002682	1.123	0.576	4.219		0.3385	0.1041		0.0007195	0.0003876	1.9	0.7129	2.062	0.5181	2.062	-0.2792	-2.912	0.5181	0.7129	-0.2792	355214096574801	35.8706155	-96.9636395
355321097270301	<80.0	17.5	7.3	5.01187E-05	2.5	4.80805E-05	0.002217	1.472	0.864	0.522	0.01023	0.251	0.1874	0.3662	0.0009848	0.0005991	1.6	0.06694	0.7775	-0.8231	0.7775	-0.9653	-2.518	-0.8231	0.06694	-0.9653	355321097270301	35.88921377	-97.4511527
355326096554901	<100	16.5	7.5	3.16228E-05	2.5	4.80805E-05	0.002636	1.223	1.358	1.348	0.05883	0.9026	0.1249	0.3329	0.0007914	0.0009167	0.9	0.2277	1.372	-0.2357	1.372	-0.5374	-2.803	-0.2357	0.2277	-0.5374	355326096554901	35.890616	-96.9305833
355352097374401	<175		6.6	0.000251189	5	9.61611E-05	0.0008002	12.87	4.32	5.176		0.6205	15.41		0.004283	0.001609	2.7	-0.3907	-0.3011	-1.845	-0.3011	-1.539	-0.2667	-1.845	-0.3907	-1.539	355352097374401	35.89782226	-97.6292132
355353097373901	<73.20	18.5	6.4	0.000398107	5	9.61611E-05	0.001555	1.148	0.5349	2.479		1.495	0.229		0.0007754	0.0003738	2.1	-1.07	-1.592	-3.185	-1.592	-2.191	-2.517	-3.185	-1.07	-2.191	355353097373901	35.89810004	-97.6278242
355446096583601	<227	17	7.9	1.25893E-05	2.5	4.80805E-05	0.001343	0.5489	0.576	0.696	0.03325	0.2228	0.0812	0.233	0.0004027	0.0004337	0.9	0.06275	1.014	-0.5903	1.014	-0.7277	-3.199	-0.5903	0.06275	-0.7277	355446096583601	35.91283654	-96.9769734
355446096583601	<227	17.3	7.6	2.51189E-05	5	9.61611E-05	0.001231	0.524	0.5349	0.6525	0.02558	0.141	0.05205		0.0003919	0.0004088	1	-0.279	0.3187	-1.283	0.3186	-1.079	-3.399	-1.283	-0.279	-1.079	355446096583601	35.91283654	-96.9769734
355446096583601	<227	16.2	7.7	1.99526E-05	5	9.61611E-05	0.001262	0.499	0.5349	0.6525	0.02558	0.141	0.05205		0.000373	0.0004089	0.9	-0.2059	0.4795	-1.131	0.4795	-0.9987	-3.417	-1.131	-0.2059	-0.9987	355446096583601	35.91283654	-96.9769734
355446096583601	<227	16.5	7.8	1.58489E-05	5	9.61611E-05	0.001415	0.499	0.576	0.6525	0.02558	0.141	0.05205		0.0003687	0.0004363	0.8	-0.05861	0.8092	-0.799	0.8092	-0.8145	-3.426	-0.799	-0.05861	-0.8145	355446096583601	35.91283654	-96.9769734
355446096583601	<227	17.4	7.7	1.99526E-05	5	9.61611E-05	0.001485	0.5739	0.576	0.6525	0.02558	0.141	0.05205		0.0004211	0.0004335	1	-0.06701	0.7374	-0.8639	0.7374	-0.8721	-3.375	-0.8639	-0.06701	-0.8721	355446096583601	35.91283654	-96.9769734
355448097012901	<295	18	7.8	1.58489E-05	6.3	0.000121163	0.002623	0.8608	0.7118	4.785	0.01969	1.329	0.4445		0.0005353	0.0004656	1.1	0.3764	1.555	-0.04204	1.555	-0.4944	-2.4	-0.04204	0.3764	-0.4944	355448097012901	35.9134	-97.0247889
355512097010001	<305	17.5	7	0.0001	1.4	2.69251E-05	0.002858	1.193	1.103	1.957	0.02148	0.519	0.1957		0.000769	0.0007415	1	-0.2317	0.3804	-1.22	0.3803	-1.064	-2.613	-1.22	-0.2317	-1.064	355512097010001	35.92001944	-97.0167528
355614097183001	<195	19.5	7.2	6.30957E-05	2.5	4.80805E-05	0.00382	2.121	2.427	5.655	0.02813	4.513	1.353	0.3828	0.001105	0.001364	0.8	0.2581	1.479	-0.1061	1.479	-0.442	-1.715	-0.1061	0.2581	-0.442	355614097183001	35.9372715	-97.308649
