# Supplementary material for: Dissolution of Mn-bearing dolomite drives elevated Cr(vi) occurrence in a Permian redbed aquifer
Source: Royal Society of Chemistry journal article supplement (doi:10.1039/d2em00395c), 2022-01-01
Supplement: d2em00395c2.pdf [file d2em00395c2.pdf]

**Electronic supplemental information for:**

# Dissolution of Mn-bearing dolomite drives elevated Cr(VI) occurrence in a Permian redbed aquifer

Jeffrey P. Westrop, Zach Tomlinson, Brandon Maples, Kato T. Dee, Andrew L. Swindle, Megan E. Elwood Madden, Qinhong Hu, Andrew S. Elwood Madden

Table of Contents

|                                                                      |                  |
|----------------------------------------------------------------------|------------------|
| <b><u>GEOLOGIC MAP OF THE STUDY AREA</u></b>                         | <b><u>1</u></b>  |
| <b><u>METHODS FOR STATISTICAL EVALUATION OF GROUNDWATER DATA</u></b> | <b><u>3</u></b>  |
| <b><u>BULK CHEMISTRY OF NATH CORE SAMPLES</u></b>                    | <b><u>8</u></b>  |
| <b><u>MINERALOGY OF NATH CORE SAMPLES BY POWDER XRD</u></b>          | <b><u>9</u></b>  |
| <b><u>DETAILED RESULTS FROM NATH CORE CHEMICAL EXTRACTIONS</u></b>   | <b><u>11</u></b> |
| <b><u>EPMA AND SEM-EDXA DATA</u></b>                                 | <b><u>11</u></b> |
| <b><u>REFERENCES CITED</u></b>                                       | <b><u>13</u></b> |

## Geologic map of the study area

**Figure S1 (next page).** The geologic map of a portion of the study area (adapted from <sup>1</sup>) to highlight the location of the Norman Arsenic Test Hole<sup>2</sup>. Aquifer rock samples used for chemical and mineralogical analysis were from the Norman Arsenic Test Hole Core.

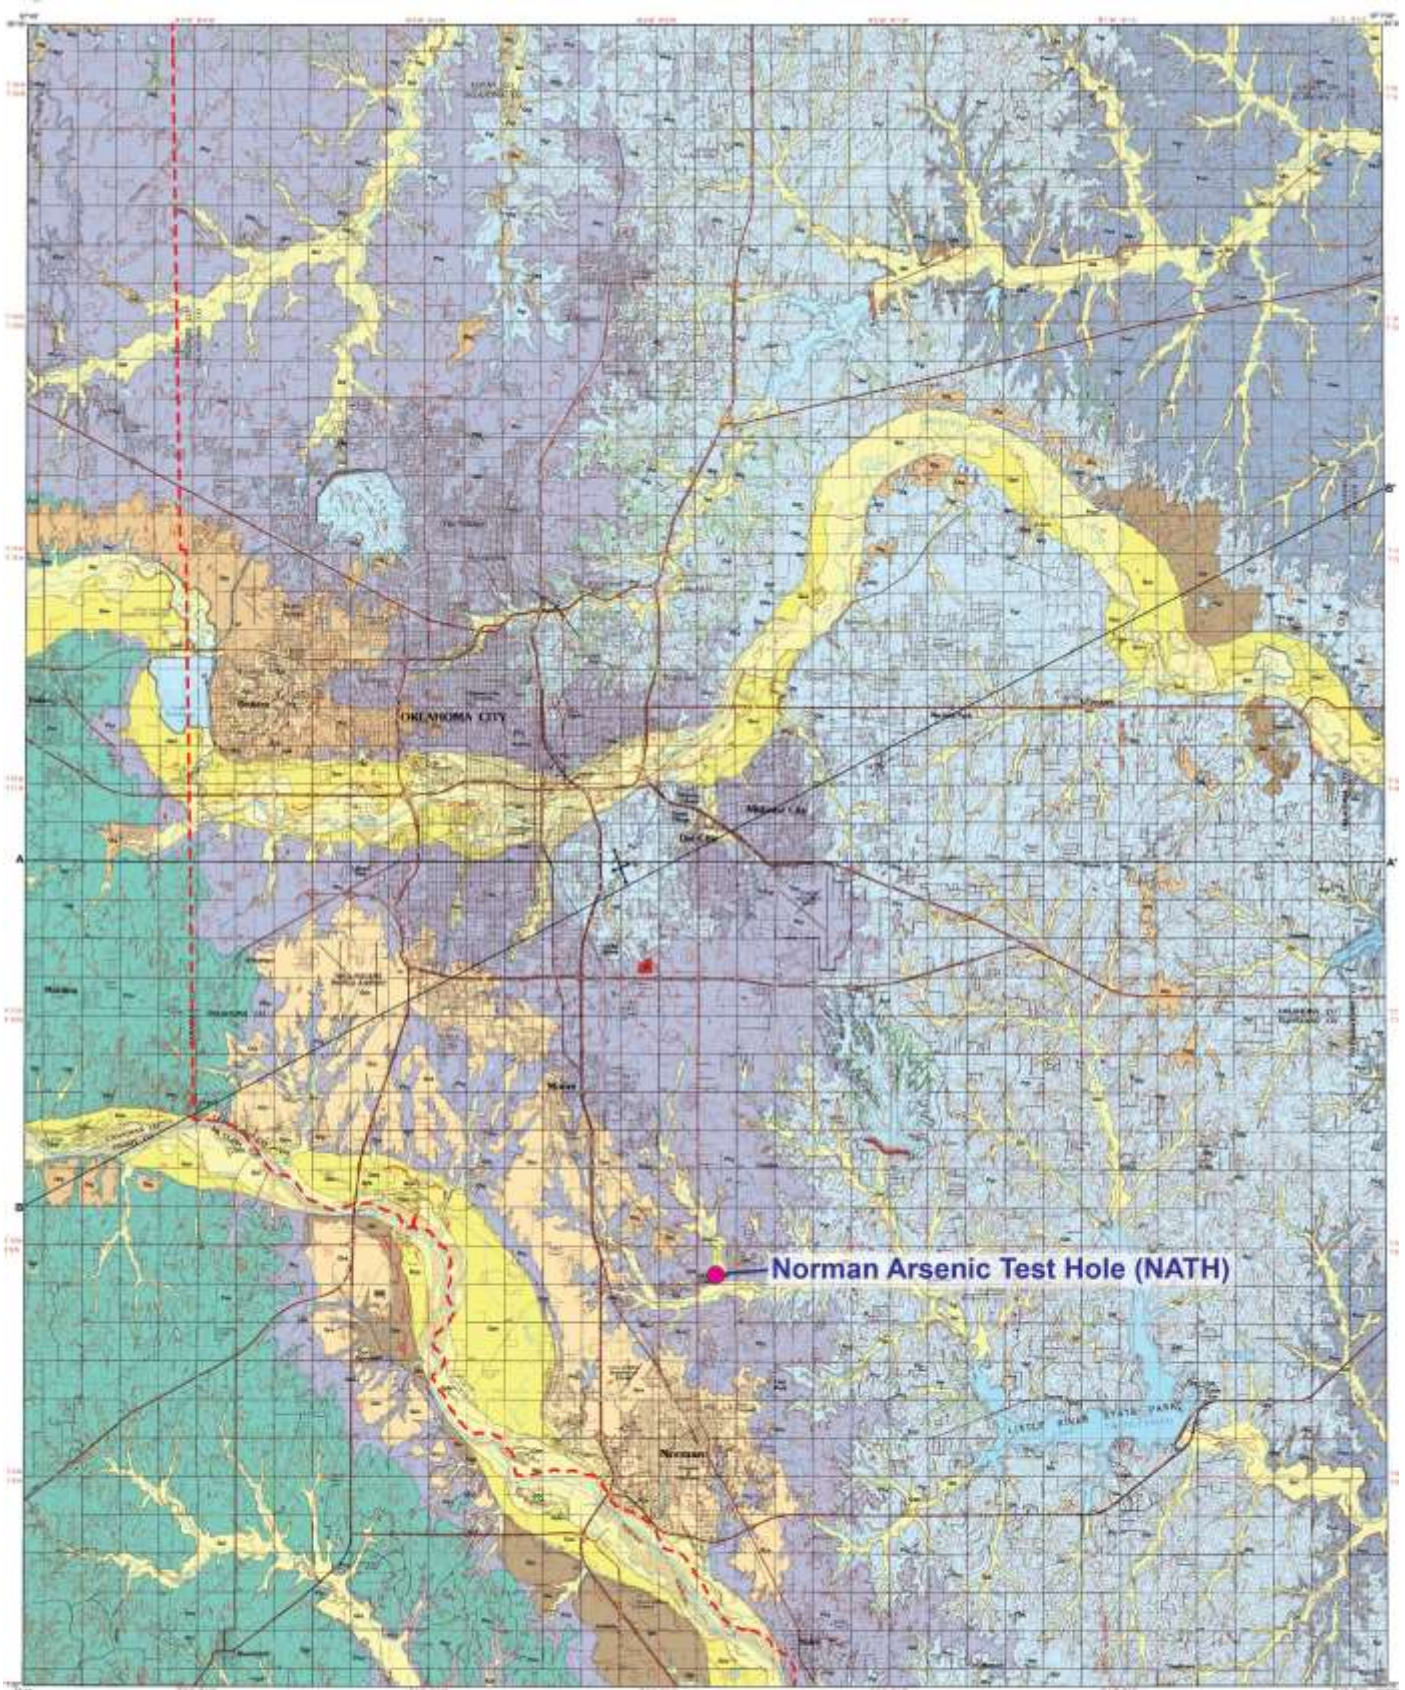

- Qvl
  - Qds
  - Qsa
  - Qcs
  - Qsr
  - Qtg
  - Qts
- Quaternary sand, gravel, and alluvium

- Rln
  - Pky
  - Pgr
  - Pwe
- Duncan Formation  
Hennessey Formation (confining layer)  
Garber Formation  
Wellington Formation
- ) Central Oklahoma Aquifer units

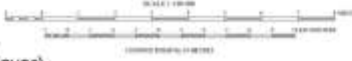

- Norman Arsenic Test Hole (NATH)
- Boundary of the Central Oklahoma Aquifer (from USGS SIM-3147, Mashburn, 2009)

## Methods for statistical evaluation of groundwater data

Data as-received from the various databases was significantly reorganized to successfully perform analyses. Before doing any data processing, it is first necessary to determine the data types. Ellefsen, Smith, and Horton<sup>3</sup>, Engle and Blondes<sup>4</sup>, Fowler et al.<sup>5</sup>, Garrett<sup>6</sup>, Boogaart and Tolosana<sup>7</sup>, etc. have all stated that geochemical data is compositional, which [requires special types of processing. Garrett<sup>6</sup> and van den Boogaart and Tolosana<sup>7</sup> define compositional data as a set of positive numbers (components) that sum up to a constant (the total). Our data (expressed in mmol/kg) may not seem to meet this requirement, but by multiplying by the molar weight of the solute it can easily be converted to ppm units, which must sum to  $10^6$ . The mmol/kg unit simply does not appear to have a fixed sum because it is a ratio between the solute and water components, but that does not affect its compositional nature.

Once the nature of the data was addressed, we also had to determine what information to filter out for the actual clustering analysis. Since a main objective of the study required clustering by geochemistry, we only considered the pH (converted to  $H^+$  concentration in mmol/L), Cr(VI) (converted to mmol/kg),  $CO_3^{2-}$  (mmol/L eq.),  $Ca^{2+}$ ,  $Mg^{2+}$ ,  $Cl^-$ , and  $SO_4^{2-}$  (all represented in mmol/kg). We removed the  $K^+$  and  $SiO_2(aq)$  concentrations from consideration because 19.4% and 50.9% of the values were missing, respectively. Although multiple methods exist for filling in missing values, they could not be accurately applied to our data. One of the methods used by Cloutier et al.<sup>8</sup> was to average values from surrounding wells to fill missing entries. Most of the wells in our dataset with missing sample values had less than 3 nearby usable wells, as seen below. Less than 3 averaged values would make the means inaccurate. Additionally, the rapid lateral changes in lithology within the Garber-Wellington, documented in Ben Abbott's thesis work<sup>9</sup>, would make averaging nearby well values potentially misleading (Figure S2).

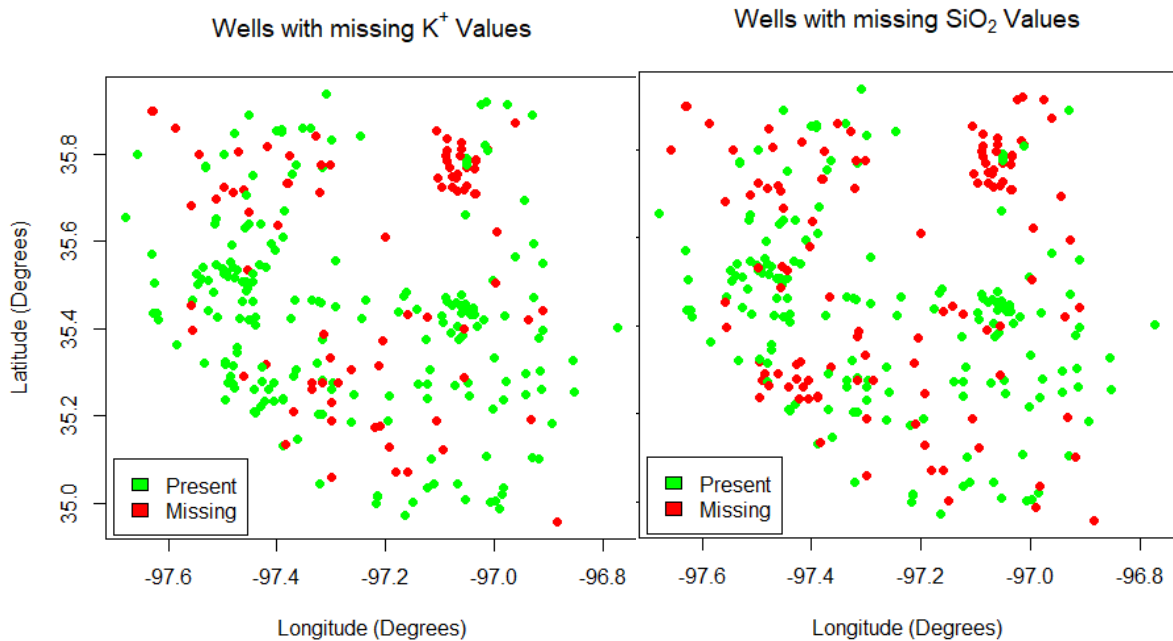

**Figure S2.** Spatial locations (map view) of data missing  $K^+$  and  $SiO_2$  (aq) values. We determined that nearby values were too sparse to consider adding predicted/estimated values; therefore these analytes were not included in the study.

Another common method fills missing at random (MAR) values based on the underlying distribution inferred from the available data, which can take many different forms<sup>7</sup>. With so much of the  $SiO_2$  (aq) and  $K^+$  data missing however, any natural partitions in the data could be easily obscured by whatever distribution model we used to calculate said values and limit the usefulness of the clustering.

A final method of filling in MAR values used by Cloutier et al.<sup>8</sup> was electro-neutrality; they calculated the missing value in the sample such that all the ions in the sample would be charge-balanced. We could not use electroneutrality because the dataset did not include all the ions present in the water samples. Out of 281 samples with both  $K^+$  and  $SiO_2$  (aq) concentrations, only 7 had an electro-neutrality within 10% of neutral, the cutoff point which Cloutier et al.<sup>8</sup> used to remove erroneous measurements. Because of the compositional nature of the data, however,

missing ions do not affect the analysis if the appropriate data processing methods are employed, which will be discussed below.

In addition to missing values, geochemical data often has concentrations which fall below the detection limits (dl's) of the methods used to measure them. Sophisticated methods for replacement usually require that the dataset be lognormally or normally distributed<sup>10</sup>, but our data did not meet that requirement. Farnham et al.<sup>10</sup> simulated a data set and implemented variable dl's such that fixed percentages of the data would fall below the detection limits. They then used PCA to show that replacing the data which fell below the dl with half of the dl value produced results generally closer to the original matrix than replacing the data with 0 or the full dl value. Therefore, we replaced values which fell below detection limits with half of the dl value.

We then isometric log ratio (ilr) transformed the dataset. The ilr transformation is justified for geochemical data in many literature sources (e.g.,<sup>3, 4, 11</sup>). The ilr is a transformation which provides the coordinates of a composition with respect to some orthonormal basis computed from the centered log ratio (clr) hyperplane<sup>7</sup>. This clr hyperplane (and, therefore, the ilr transformation) meets the required properties of compositional data; namely, scaling invariance and subcompositional coherence<sup>7</sup>. The property of scaling invariance states that the size of the sample is irrelevant, which is an obvious necessity for compositional data. Imagine getting two water samples: one 1 kg and one 500g. Let the 1 kg sample contain 0.2 mmol of Na<sup>+</sup>. Let the 500 g sample contain 0.1 mmol of Na<sup>+</sup>. Despite being outwardly different measurements, the two measurements clearly represent the same concentration. Subcompositional coherence essentially states that adding or subtracting components should not change the relationship between the data. Using a ternary diagram (or Piper plot) relies on subcompositional coherence because it

examines the relationships between only a few variables and requires that those results can be extrapolated to the full data set. In fact, the ilr transformation could be considered the x y coordinates of the points on a ternary diagram in a system that contains 3 components.

Therefore, the ilr transformation occupies a  $D-1$  dimensional space. Along the same analogy, the clr transformation takes the points from a ternary plot and projects them back into  $\mathbb{R}^D$  but in an orthonormal basis which is also perpendicular to the  $v = \langle 1, 1, \dots, 1 \rangle$  vector, the vector representing the center of any ternary plot<sup>7</sup>. Since both the clr and ilr transformation meet the requirements for compositional data, they are both readily used for data processing and have their own strengths and weaknesses.

The original data (from the NWIS dataset by USGS) had multiple measurements for some of the wells corresponding to different years and seasons. To avoid giving some of the wells large weights from being sampled more often, we averaged together all of the measurements that came from the same well at the same depth (in ilr space). There was no statistically significant difference in the spring vs. winter geochemistry at 95% confidence, which justifies averaging together the repeat measurements. We created a random sample of 30 wells that were sampled in both the late spring (May/June) and near winter (mostly November, January, and February). A hypothesis test on the null hypothesis that the mean spring geochemistry was equal to the mean summer geochemistry yielded a p-value of 0.9838, indicating that the null hypothesis could not be rejected at 95% confidence.

Once all of the repeat measurements were averaged together in ilr space, they were transformed back to real space and then to clr space for hierarchical cluster analysis. This processing method for cluster analysis is recommended by van den Boogaart and Tolosana<sup>7</sup>, as clr transformation projects the compositional points into a coordinate system that can generate

effective euclidean distance matrices for the cluster analysis. Ward's method for linkage was used along with the euclidean distance calculations using the `dist()` and `hclust()` r functions. Five clusters were chosen because, based on the cluster dendrogram, 5 was the minimum number of clusters which kept within-cluster variation (measured as euclidean distance) relatively small. There is a large gap between the within-cluster variation for 5 or more clusters and less than 5 clusters. Despite the benefits of clr and ilr transformation in clustering, they destroy the original data structure and units; therefore, the original data was used to calculate descriptive statistics for the clusters.

## Bulk chemistry of NATH core samples

| Sample # | Depth (ft) | Cr (ppm) | U (ppm) | As (ppm) | Fe (%) | S (%) |
|----------|------------|----------|---------|----------|--------|-------|
| 1        | 303        | 30       | 0.9     | 11       | 1.1    | 0.01  |
| 2        | 322        | 110      | 2.6     | 7        | 2.7    | 0.01  |
| 3        | 331        | 90       | 2.0     | 12       | 2.5    | 0.01  |
| 4        | 334        | 50       | 1.2     | 0        | 0.9    | <0.01 |
| 5        | 372        | 50       | 0.6     | 0        | 0.3    | 0.01  |
| 6        | 374        | 100      | 2.5     | 8        | 2.8    | 0.01  |
| 7        | 375        | 40       | 1.0     | 0        | 0.7    | 0.02  |
| 8        | 377        | 130      | 3.8     | 11       | 3.6    | 0.04  |
| 9        | 386        | 80       | 2.0     | 5        | 1.8    | 0.01  |
| 10       | 391        | 120      | 3.1     | 18       | 6.0    | 0.01  |
| 11       | 402        | 60       | 1.5     | 3        | 0.9    | 0.01  |
| 12       | 415        | 130      | 3.2     | 5        | 2.2    | <0.01 |
| 13       | 420        | 20       | 0.4     | 0        | 0.3    | <0.01 |
| 14       | 425        | 40       | 1.0     | 0        | 0.5    | <0.01 |
| 15       | 429        | 80       | 1.9     | 0        | 0.4    | <0.01 |
| 16       | 440        | 10       | 0.4     | 0        | 0.2    | <0.01 |
| 17       | 443        | 60       | 1.6     | 7        | 1.4    | <0.01 |
| 18       | 456        | 30       | 0.7     | 0        | 0.2    | 0.01  |
| 19       | 458        | 120      | 3.3     | 0        | 4.7    | 0.01  |
| 20       | 463        | 90       | 2.6     | 5        | 1.9    | 0.01  |
| 21       | 468        | 100      | 3.1     | 11       | 5.4    | 0.02  |
| 22       | 470        | 60       | 2.0     | 0        | 1.9    | 0.02  |
| 23       | 471        | 80       | 2.7     | 0        | 4.5    | 0.03  |
| 24       | 474        | 80       | 2.3     | 0        | 2.1    | 0.04  |
| 25       | 475        | 80       | 2.0     | 0        | 1.4    | 0.02  |
| 26       | 477        | 80       | 2.1     | 6        | 2.1    | 0.03  |
| 27       | 479        | 80       | 2.2     | 0        | 2.6    | 0.04  |
| 28       | 481        | 60       | 1.1     | 0        | 0.8    | 0.03  |
| 29       | 483        | 60       | 1.7     | 8        | 1.9    | 0.04  |
| 30       | 485        | 120      | 2.9     | 15       | 5.1    | 0.04  |
| 31       | 489        | 70       | 1.1     | 0        | 0.5    | 0.01  |
| 32       | 490        | 30       | 0.6     | 0        | 0.5    | 0.01  |
| 33       | 492        | 50       | 0.9     | 0        | 0.4    | 0.01  |
| 34       | 496        | 50       | 1.4     | 0        | 1.8    | 0.02  |
| 35       | 502        | 160      | 2.5     | 0        | 3.1    | 0.01  |
| 36       | 504        | 90       | 2.4     | N/A      | N/A    | N/A   |
| 37       | 512        | 110      | 2.9     | N/A      | N/A    | N/A   |
| 38       | 517        | 100      | 2.9     | 5        | 2.7    | 0.01  |
| 39       | 524        | 130      | 3.3     | 16       | 5.6    | 0.01  |
| 40       | 526        | 120      | 2.7     | 8        | 2.6    | 0.01  |
| 41       | 535        | 110      | 2.9     | 10       | 3.2    | <0.01 |
| 42       | 571        | 40       | 0.8     | 0        | 0.3    | <0.01 |
| 43       | 573        | 20       | 0.5     | 0        | 0.3    | 0.01  |
| 44       | 581        | 30       | 0.7     | N/A      | N/A    | N/A   |
| 45       | 589        | 70       | 1.3     | 0        | 0.8    | <0.01 |
| 46       | 595        | 60       | 1.7     | N/A      | N/A    | N/A   |
| 47       | 642        | 20       | 0.5     | 0        | 0.3    | <0.01 |
| 48       | 647        | 30       | 0.5     | 0        | 0.2    | 0.01  |
| 49       | 649        | 160      | 3.1     | 13       | 4.0    | 0.02  |
| 50       | 651        | 20       | 0.6     | 0        | 0.5    | 0.02  |

**Table S1. Selected bulk chemical analyses of the core samples from the NATHC.** Samples highlighted in grey are mudstones, while the samples in orange are sandstones, and samples in red are conglomerates. All tables displaying results from the NATHC follow this color scheme.



## Mineralogy of NATH core samples by powder XRD

| Sample # | Depth (ft) | % Qtz | % Clay | % Carb | % Plag | % K-spar | % Hem | % Anatase | Total |
|----------|------------|-------|--------|--------|--------|----------|-------|-----------|-------|
| 1        | 303        | 15.2  | 0.7    | 83.1   | 0.5    | 0.5      | 0     | 0         | 100   |
| 2        | 322        | 65.5  | 30     | 0      | 0      | 4        | 0.5   | 0         | 100   |
| 3        | 331        | 89.2  | 7.3    | 0      | 0      | 1.8      | 1.6   | 0         | 99.9  |
| 4        | 334        | 96.3  | 0.1    | 2.9    | 0      | 0        | 0.7   | 0         | 100   |
| 5        | 372        | 61.2  | 0      | 38.4   | 0      | 0.4      | 0     | 1         | 100   |
| 6        | 374        | 64.6  | 21.2   | 10.7   | 1.2    | 0.9      | 1.4   | 0         | 100   |
| 7        | 375        | 78.9  | 17     | 0      | 0.6    | 2.2      | 0.8   | 0.5       | 100   |
| 8        | 377        | 71.9  | 11     | 13.1   | 0      | 2.7      | 1.1   | 0         | 99.8  |
| 9        | 386        | 72.6  | 26.2   | 0      | 0      | 0.8      | 0.4   | 0         | 100   |
| 10       | 391        | 41.8  | 51.6   | 0      | 0.3    | 1.2      | 2.5   | 2.5       | 99.9  |
| 11       | 402        | 82.6  | 14.3   | 0      | 1.2    | 1.4      | 0.5   | 0         | 100   |
| 12       | 415        | 81.2  | 16.9   | 0      | 1.1    | 0.5      | 0.3   | 0         | 100   |
| 13       | 420        | 75.1  | 23.8   | 0.3    | 0.4    | 0.3      | 0.1   | 0         | 100   |
| 14       | 425        | 88.5  | 9.9    | 0      | 0.7    | 0.3      | 0.7   | 0         | 100.1 |
| 15       | 429        | 97.7  | 0.3    | 0      | 0.8    | 1        | 0.2   | 0         | 100   |
| 16       | 440        | 97.5  | 0.6    | 0.6    | 0.8    | 0.7      | 0     | 0         | 100.2 |
| 17       | 443        | 82.6  | 15.1   | 0.2    | 1      | 0.6      | 0.5   | 0         | 100   |
| 18       | 456        | 81.9  | 3.8    | 12.7   | 0.8    | 0.5      | 0.1   | 0         | 99.8  |
| 19       | 458        | 39.6  | 48.7   | 0      | 8.4    | 2.3      | 0.9   | 0         | 99.9  |
| 20       | 463        | 80.6  | 15.3   | 0      | 1.5    | 2.1      | 0.4   | 0         | 99.9  |
| 21       | 468        | 52.5  | 34.7   | 0.5    | 0      | 4.4      | 7.9   | 0         | 100   |
| 22       | 470        | 72.2  | 21.7   | 0      | 0.6    | 5.2      | 0.3   | 0         | 100   |
| 23       | 471        | 66.9  | 25     | 3.4    | 1.8    | 1.3      | 1.5   | 0         | 99.9  |
| 24       | 474        | 24    | 11.3   | 62.2   | 1.1    | 0.7      | 0.4   | 0         | 99.7  |
| 25       | 475        | 77.5  | 15.3   | 0      | 2.3    | 5        | 0     | 0         | 100.1 |
| 26       | 477        | 73.4  | 24.4   | 1      | 0      | 1.2      | 0     | 0         | 100   |
| 27       | 479        | 62.9  | 30.8   | 0.1    | 3.1    | 1.9      | 0.1   | 1         | 99.9  |
| 28       | 481        | 84.6  | 7.7    | 0      | 4.9    | 2.2      | 0.4   | 0.1       | 99.9  |
| 29       | 483        | 68    | 26.9   | 0      | 3.4    | 1        | 0.7   | 0         | 100   |
| 30       | 485        | 67    | 26.7   | 0      | 4.7    | 1.2      | 0.6   | 0         | 100.2 |
| 31       | 489        | 94.4  | 2.1    | 1.4    | 1.4    | 0.5      | 0.2   | 0         | 100   |
| 32       | 490        | 93.4  | 0.7    | 4.8    | 0.9    | 0        | 0.3   | 0         | 100.1 |
| 33       | 492        | 97.1  | 1      | 1.2    | 0.7    | 0.1      | 0     | 0         | 100.1 |
| 34       | 496        | 91.7  | 7.1    | 0.2    | 0.4    | 0        | 0.6   | 0         | 100   |
| 35       | 502        | 67.5  | 29.3   | 0      | 0.2    | 1.3      | 1.1   | 0.5       | 99.9  |
| 36       | 504        | 70.8  | 26.1   | 0      | 1.6    | 0.5      | 0.9   | 0         | 99.9  |
| 37       | 512        | 55.9  | 38     | 0      | 4.3    | 1.3      | 0.6   | 0         | 100.1 |
| 38       | 517        | 57.1  | 40.4   | 0.3    | 1.3    | 0.5      | 0.5   | 0         | 100.1 |
| 39       | 524        | 40.8  | 47.7   | 0      | 6.3    | 0.4      | 3.3   | 1.5       | 100   |
| 40       | 526        | 64.2  | 28.8   | 0      | 3.3    | 1        | 1.9   | 0.9       | 100.1 |
| 41       | 535        | 75.2  | 21.4   | 0      | 1.3    | 1.3      | 0.5   | 0.4       | 100.1 |
| 42       | 571        | 95.4  | 3.2    | 0      | 1      | 0.3      | 0.2   | 0         | 100.1 |
| 43       | 573        | 74.2  | 1.2    | 24.3   | 0      | 0.2      | 0.1   | 0         | 100   |
| 44       | 581        | 95.9  | 1.9    | 1.5    | 0.3    | 0.3      | 0     | 0         | 99.9  |
| 45       | 589        | 90.9  | 5.3    | 2.2    | 0.7    | 0.7      | 0.3   | 0         | 100.1 |
| 46       | 595        | 72.9  | 9.2    | 15.9   | 0.4    | 1        | 0.7   | 0         | 100.1 |
| 47       | 642        | 99    | 0.5    | 0      | 0.3    | 0.1      | 0.1   | 0         | 100   |
| 48       | 647        | 97.6  | 1.9    | 0      | 0.4    | 0        | 0.1   | 0         | 100   |
| 49       | 649        | 61    | 32.8   | 0      | 0.2    | 1.4      | 4.7   | 0         | 100.1 |
| 50       | 651        | 72.3  | 1.6    | 25.7   | 0      | 0.3      | 0.2   | 0         | 100.1 |

**Table S2. Bulk XRD results for the core samples.**

| Sample # | Depth (ft) | % Clay | % Kaol | % Mica/ illite | % Chl | % Carb | % Dol | % Ank | % Cal |
|----------|------------|--------|--------|----------------|-------|--------|-------|-------|-------|
| 1        | 303        | 0.7    | 0.7    | 0              | 0     | 83.1   | 83.1  | 0     | 0     |
| 2        | 322        | 30     | 18     | 12             | 0     | 0      | 0     | 0     | 0     |
| 3        | 331        | 7.3    | 1.9    | 5.4            | 0     | 0      | 0     | 0     | 0     |
| 4        | 334        | 0.1    | 0.1    | 0              | 0     | 2.9    | 0     | 2.9   | 0     |
| 5        | 372        | 0      | 0      | 0              | 0     | 38.4   | 1.3   | 0     | 37.1  |
| 6        | 374        | 21.2   | 12.8   | 8.4            | 0     | 10.7   | 10.7  | 0     | 0     |
| 7        | 375        | 17     | 8.1    | 8.9            | 0     | 0      | 0     | 0     | 0     |
| 8        | 377        | 11     | 9      | 2              | 0     | 13.1   | 10.6  | 0     | 2.5   |
| 9        | 386        | 26.2   | 10     | 13.7           | 2.5   | 0      | 0     | 0     | 0     |
| 10       | 391        | 51.6   | 39.3   | 12.3           | 0     | 0      | 0     | 0     | 0     |
| 11       | 402        | 14.3   | 5.6    | 7.9            | 0.8   | 0      | 0     | 0     | 0     |
| 12       | 415        | 16.9   | 15.1   | 1.8            | 0     | 0      | 0     | 0     | 0     |
| 13       | 420        | 23.8   | 1.3    | 22.5           | 0     | 0.3    | 0.3   | 0     | 0     |
| 14       | 425        | 9.9    | 5.1    | 4.8            | 0     | 0      | 0     | 0     | 0     |
| 15       | 429        | 0.3    | 0.1    | 0.2            | 0     | 0      | 0     | 0     | 0     |
| 16       | 440        | 0.6    | 0.4    | 0.2            | 0     | 0.6    | 0.6   | 0     | 0     |
| 17       | 443        | 15.1   | 11.3   | 3.8            | 0     | 0.2    | 0.2   | 0     | 0     |
| 18       | 456        | 3.8    | 3.8    | 0              | 0     | 12.7   | 12.4  | 0     | 0.3   |
| 19       | 458        | 48.7   | 29.9   | 15             | 3.8   | 0      | 0     | 0     | 0     |
| 20       | 463        | 15.3   | 13.2   | 1.3            | 0.8   | 0      | 0     | 0     | 0     |
| 21       | 468        | 34.7   | 9.3    | 22.3           | 3.1   | 0.5    | 0.5   | 0     | 0     |
| 22       | 470        | 21.7   | 10.3   | 5.2            | 6.2   | 0      | 0     | 0     | 0     |
| 23       | 471        | 25     | 9      | 15.6           | 0.4   | 3.4    | 3.4   | 0     | 0     |
| 24       | 474        | 11.3   | 4.4    | 6.8            | 0.1   | 62.2   | 45.9  | 16.3  | 0     |
| 25       | 475        | 15.3   | 13.5   | 0.7            | 1.1   | 0      | 0     | 0     | 0     |
| 26       | 477        | 24.4   | 9      | 15.4           | 0     | 1      | 1     | 0     | 0     |
| 27       | 479        | 30.8   | 6      | 24.8           | 0     | 0.1    | 0.1   | 0     | 0     |
| 28       | 481        | 7.7    | 2.6    | 3.4            | 1.7   | 0      | 0     | 0     | 0     |
| 29       | 483        | 26.9   | 15.2   | 7              | 4.7   | 0      | 0     | 0     | 0     |
| 30       | 485        | 26.7   | 8.6    | 11.6           | 6.5   | 0      | 0     | 0     | 0     |
| 31       | 489        | 2.1    | 1      | 1.1            | 0     | 1.4    | 0.9   | 0     | 0.5   |
| 32       | 490        | 0.7    | 0.7    | 0              | 0     | 4.8    | 2     | 0     | 2.8   |
| 33       | 492        | 1      | 0.4    | 0.6            | 0     | 1.2    | 1.2   | 0     | 0     |
| 34       | 496        | 7.1    | 5.5    | 1.6            | 0     | 0.2    | 0.1   | 0     | 0.1   |
| 35       | 502        | 29.3   | 17.7   | 8.8            | 2.8   | 0      | 0     | 0     | 0     |
| 36       | 504        | 26.1   | 10.4   | 13.2           | 2.5   | 0      | 0     | 0     | 0     |
| 37       | 512        | 38     | 13.9   | 20.5           | 3.6   | 0      | 0     | 0     | 0     |
| 38       | 517        | 40.4   | 5      | 14.6           | 20.8  | 0.3    | 0.3   | 0     | 0     |
| 39       | 524        | 47.7   | 28.1   | 19.6           | 0     | 0      | 0     | 0     | 0     |
| 40       | 526        | 28.8   | 11.4   | 17.4           | 0     | 0      | 0     | 0     | 0     |
| 41       | 535        | 21.4   | 8      | 13.4           | 0     | 0      | 0     | 0     | 0     |
| 42       | 571        | 3.2    | 2.1    | 1.1            | 0     | 0      | 0     | 0     | 0     |
| 43       | 573        | 1.2    | 0.6    | 0.6            | 0     | 24.3   | 0     | 0     | 24.3  |
| 44       | 581        | 1.9    | 1.2    | 0.7            | 0     | 1.5    | 1.5   | 0     | 0     |
| 45       | 589        | 5.3    | 3.1    | 2.2            | 0     | 2.2    | 2.2   | 0     | 0     |
| 46       | 595        | 9.2    | 6      | 3.2            | 0     | 15.9   | 15.9  | 0     | 0     |
| 47       | 642        | 0.5    | 0.5    | 0              | 0     | 0      | 0     | 0     | 0     |
| 48       | 647        | 1.9    | 1.9    | 0              | 0     | 0      | 0     | 0     | 0     |
| 49       | 649        | 32.8   | 18.8   | 14             | 0     | 0      | 0     | 0     | 0     |
| 50       | 651        | 1.6    | 1.1    | 0.5            | 0     | 25.7   | 25.7  | 0     | 0     |

**Table S3. Detailed Clay and Carbonate bulk XRD results**

Separates % clay into % kaolinite, % illite, and % chlorite, and % carbonate into % dolomite, % calcite, and % ankerite.

## Detailed results from NATH core chemical extractions

| Sample | Depth | Net Cr ox (ppb) | UPW Cr AA (ppb) | PO4 Cr AA (ppb) | HHCl Cr AA (ppb) | 6N HCl AA (ppb) | Mn Oxides (ppm) |
|--------|-------|-----------------|-----------------|-----------------|------------------|-----------------|-----------------|
| 1      | 322   | 35              | BDL             | 47              | BDL              | 758             | 93              |
| 2      | 373   | 8               | BDL             | 45              | 6                | 139             | 3520            |
| 3      | 376   | 20              | 3               | 52              | BDL              | 687             | 365             |
| 4      | 402   | 111             | 2               | 45              | 1                | 377             | 55              |
| 5      | 420   | 252             | BDL             | 31              | 10               | 22              | 292             |
| 6      | 429   | 114             | BDL             | 38              | BDL              | 116             | 74              |
| 7      | 473   | 140             | 1               | 46              | 3                | 438             | 4635            |
| 8      | 479   | 69              | BDL             | 22              | BDL              | 954             | 29              |
| 9      | 485   | 51              | 6               | 53              | BDL              | 1058            | 175             |
| 10     | 502   | 13              | BDL             | 53              | 4                | 2031            | 25              |
| 11     | 535   | 25              | 2               | 55              | 14               | 890             | 382             |
| 12     | 584   | 204             | BDL             | 44              | 7                | 269             | 291             |
| 13     | 595   | 59              | 3               | 59              | BDL              | 717             | 156             |
| 14     | 642   | 228             | 5               | 42              | BDL              | 827             | 113             |

**Table S4. Results from chemical extractions.** “Mn-oxides” corresponds to the Mn value of the supernatant of the selective Mn-HHCl extraction. The table is color-coded based on lithology. BDL=“below detection limit”.

## EPMA and SEM-EDXA data

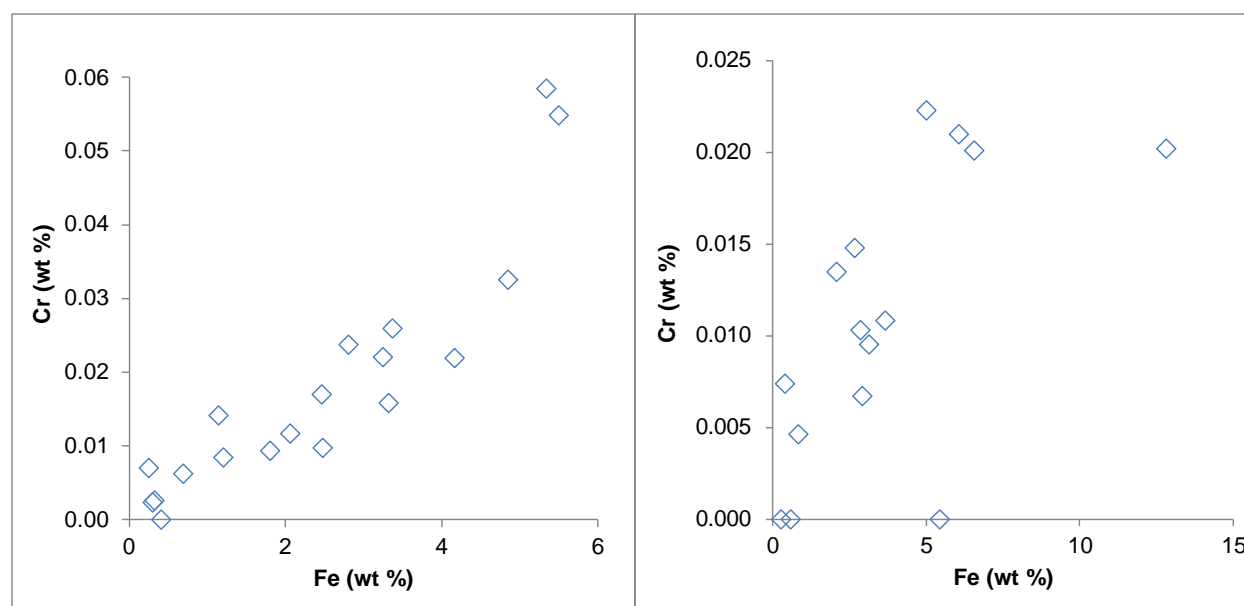

**Fig. S3.** Calculated wt.% values calculated from Wavelength-Dispersive X-ray Spectroscopy (WDS) for individual points determined via EPMA on Norman Arsenic Test Hole (NATH) core samples from 323 ft deep (left) and 502 ft deep (right).

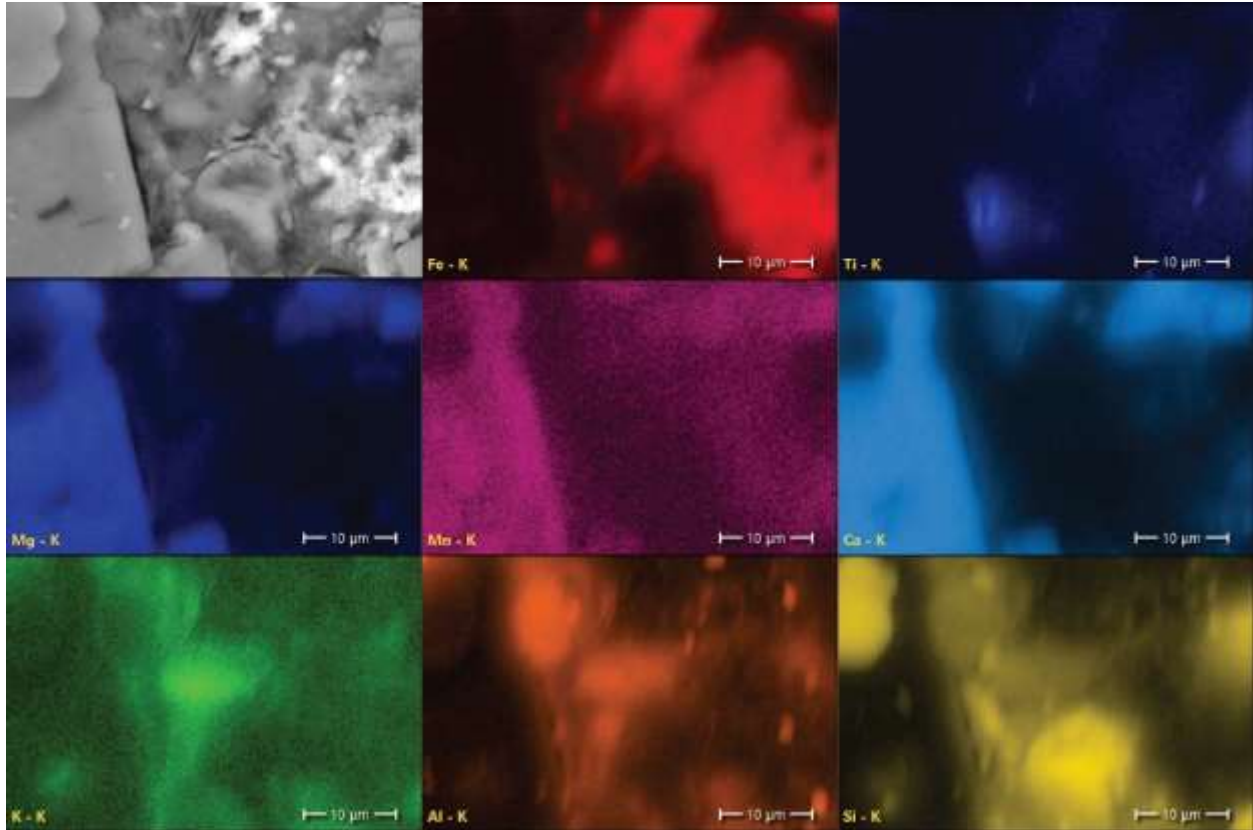

**Figure S4.** Backscattered electron image (upper left) and energy-dispersive X-ray analysis elemental maps (other panels, labelled with element of interest) collected on a thin section sample from the Norman Arsenic Test Hole core at 591 ft. depth. detailing a of a region showing a pore next to dolomite in Mn is enriched both in the relatively coarse-grained Mg-Ca rich dolomite area to the left in addition to the fine-grained Fe-enriched pore filling material that includes Fe, Mn oxides and clays.

## References cited

1. T. M. Stanley and G. R. Standridge, Geologic map compilation of the Oklahoma City Metro Area, Central Oklahoma. *Journal*, 2008, OGQ-74.
2. J. Smith, S. Paxton, S. Christenson, R. Puls and J. Greer, Flow Contribution and Water Quality with Depth in a Test Hole and Public-supply Wells: Implications for Arsenic Remediation Through Well Modification, Norman, Oklahoma, 2003-2006, U.S. Environmental Protection Agency, Office of Research and Development, National Risk Management Laboratory, 2009.
3. K. J. Ellefsen, D. B. Smith and J. D. Horton, A modified procedure for mixture-model clustering of regional geochemical data, *Applied Geochemistry*, 2014, **51**, 315-326.
4. M. A. Engle and M. S. Blondes, Linking compositional data analysis with thermodynamic geochemical modeling: Oilfield brines from the Permian Basin, USA, *Journal of Geochemical Exploration*, 2014, **141**, 61-70.
5. A. Fowler, N. Spycher, R. A. Zierenberg and C. A. Cantwell, Identification of blind geothermal resources in Surprise Valley, CA, using publicly available groundwater well water quality data, *Applied Geochemistry*, 2017, **80**, 24-48.
6. R. G. Garrett, The 'rgr' package for the R Open Source statistical computing and graphics environment - a tool to support geochemical data interpretation, *Geochemistry: Exploration, Environment, Analysis*, 2013, **13**, 355-378.
7. K. G. v. d. Boogaart and R. Tolosana-Delgado, Analyzing Compositional Data with R, 2013, DOI: 10.1007/978-3-642-36809-7.
8. V. Cloutier, R. Lefebvre, R. Therrien and M. M. Savard, Multivariate statistical analysis of geochemical data as indicative of the hydrogeochemical evolution of groundwater in a sedimentary rock aquifer system, *J Hydrol*, 2008, **353**, 294-313.
9. B. N. Abbott, M.S. thesis, Oklahoma State University, 2005.
10. I. M. Farnham, A. K. Singh, K. J. Stetzenbach and K. H. Johannesson, Treatment of nondetects in multivariate analysis of groundwater geochemistry data, *Chemometrics and Intelligent Laboratory Systems*, 2002, **60**, 265-281.
11. H. Iwamori, K. Yoshida, H. Nakamura, T. Kuwatani, M. Hamada, S. Haraguchi and K. Ueki, Classification of geochemical data based on multivariate statistical analyses: Complementary roles of cluster, principal component, and independent component analyses, *Geochemistry, Geophysics, Geosystems*, 2017, **18**, 994-1012.
